# Supplementary material
Source: publisher figshare collection journal article supplement (https://plos.figshare.com/articles/dataset/_/11324555)
Supplement: Supplementary file 1 [file 1]

Archive with 6 entries (6 files):
- pone.0225571.s001.doc
- pone.0225571.s002.docx
- pone.0225571.s003.xls
- pone.0225571.s004.pdf
- pone.0225571.s005.pdf
- pone.0225571.s006.pdf
