# Supplementary material
Source: publisher figshare collection journal article supplement (https://plos.figshare.com/articles/dataset/_/11324555)
Supplement: Supplementary file 1 [file 1 › pone.0225571.s003.xls]

## Sheet: Sheet1
resulthiv_new	resultcd4_new	vcodee	locborn	ethnic	marital	edu	employ	sex	sexage	sexforce	sexno	sexno3mo	msm	alcoh	cig	circum	obwart	resulthiv_pvl	resultcd4e	citizenship	marital_grp	cd4_grp	educ	coitaldebut	nw_hivpvl	nw_hivcd4	cyto	analcyto	dur1	curr_alc	employ_nw	msp1	cons_cd	v1hpvan_6	v1hpvan_11	v1hpvan_16	v1hpvan_16	v1hpvan_18	v1hpvan_26	v1hpvan_26	v1hpvan_31	v1hpvan_33	v1hpvan_35	v1hpvan_35	v1hpvan_39	v1hpvan_40	v1hpvan_42	v1hpvan_45	v1hpvan_51
520	632	1	Kwazulu Natal	Black	Single	Incomplete Secondary	Unemployed	Yes	18	Yes	400	2	No	2 to 3 times a week	Yes	No	No	520		SA	Not married	350 and above	Secondary	16-20 yrs	520	632	LSIL	Abnormal	39.6333	Yes	unemployed	More than one	No	0	0	0	0	0	0	0	0	0	0	0	0	0	0	0	0
-99	435	1	Outside South Africa	Black	Married	Completed Secondary	Unemployed	Yes	18	No	30	1	No	Never	No	No	No	-99		Non-SA	Currently Married	350 and above	Secondary	16-20 yrs	-99	435	ASCUS	Abnormal	20.3333	No	unemployed	One	No	0	0	0	0	0	0	0	0	0	0	0	0	0	0	0	0
40	492	1	North West	Black	Single	Incomplete Secondary	Employed full-time	Yes	18	No	10	1	No	Never	No	Yes	Yes	40		SA	Not married	350 and above	Secondary	16-20 yrs	40	492	LSIL	Abnormal	7.23333	No	Employed	One	No	0	0	0	0	0	0	0	0	0	0	0	0	0	0	0	0
200	156	1	Gauteng	Black	Single	Graduate/Postgraduate	Unemployed	Yes	18	No	100	1	No	2 to 4 times a month	No	No	No	200		SA	Not married	Less than 350	Tertiary	16-20 yrs	200	156	LSIL	Abnormal	22.4667	Yes	unemployed			0	0	0	0	0	0	0	0	0	0	0	0	0	0	0	0
-99	345	1	Gauteng	Black	Single	Incomplete Secondary	Employed part-time	Yes	13	No	999	99	Yes	4 or more times a week	Yes	No	No	-99		SA	Not married	Less than 350	Secondary	10-15 yrs	-99	345	LSIL	Abnormal	10.9667	Yes	Employed	More than one	No	0	0	1	1	0	0	0	0	0	0	0	0	0	0	0	1
264181	385	1	Outside South Africa	Black	Single	Completed Secondary	Employed part-time	Yes	16	No	80	6	No	2 to 3 times a week	No	No	No	264181		Non-SA	Not married	350 and above	Secondary	16-20 yrs	264181	385	Cytology			Yes	Employed	More than one	No	0	0	0	0	0	0	0	0	0	0	0	0	0	0	0	0
0	336	1	Outside South Africa	Black	Widowed	Primary	Employed part-time	Yes	17	No	300	1	No	Never	No	No	No	-99	336	Non-SA	Not married	Less than 350	Primary	16-20 yrs	-99	276	Normal	Normal	28	No	Employed	One	No
40	406	1	Gauteng	Black	Widowed	Primary	Unemployed	Yes	22	No	13	2	No	Never	No	No	No	40		SA	Not married	350 and above	Primary	>20 yrs	40	406	ASCUS	Abnormal	61.7	No	unemployed	More than one	No
0	293	1	Gauteng	Black	Single	Incomplete Secondary	Unemployed	Yes	16	No	12	3	No	2 to 4 times a month	Yes	No	No	0		SA	Not married	Less than 350	Secondary	16-20 yrs	0	293	LSIL	Abnormal	6.36667	Yes	unemployed	More than one	0	0	0	1	1	0	0	0	0	0	0	0	0	0	0	0	0
0	586	1	Kwazulu Natal	Black	Single	Incomplete Secondary	Unemployed	Yes	18	No	150	10	Yes	2 to 3 times a week	No	No	No	-99	586	SA	Not married	350 and above	Secondary	16-20 yrs	-99	548	Normal	Normal	101.6	Yes	unemployed			0	0	0	0	1	0	0	0	0	0	0	0	0	1	0	1
40	442	1	Outside South Africa	Black	Married	Completed Secondary	Employed part-time	Yes	16	No	280	1	No	2 to 4 times a month	No	No	Yes		442	Non-SA	Currently Married	350 and above	Secondary	16-20 yrs	40	442	LSIL	Abnormal	37.0667	Yes	Employed	One	No	0	0	0	0	0	0	0	0	0	0	0	0	0	0	0	0
0	585	1	Outside South Africa	Black	Single	Completed Secondary	Unemployed	Yes	22	No	7	1	No	Never	No	Yes	No	0		Non-SA	Not married	350 and above	Secondary	>20 yrs	0	585	LSIL	Abnormal	40.1667	No	unemployed	One	No	0	0	0	0	0	0	0	0	0	0	0	0	0	0	0	0
40	444	1	Gauteng	Black	Single	Incomplete Secondary	Unemployed	Yes	15	No	20	1	No	2 to 4 times a month	Yes	No	Yes	40		SA	Not married	350 and above	Secondary	10-15 yrs	40	444	Cytology		53.3333	Yes	unemployed	One	No
0	712	1	Gauteng	Black	Divorced/Separated	Incomplete Secondary	Unemployed	Yes	15	No	49	2	No	Once a month or less	No	Yes	No	0		SA	Not married	350 and above	Secondary	10-15 yrs	0	712	LSIL	Abnormal	41.2	Yes	unemployed			0	0	0	0	0	0	0	0	0	0	0	0	0	0	0	0
145337	486	1	Eastern Cape	Black	Single	Completed Secondary	Self employed	Yes	16	No	7	3	Yes	Never	No	No	No	145337		SA	Not married	350 and above	Secondary	16-20 yrs	145337	486	Normal	Normal		No	Employed	More than one	No
40	446	1	Outside South Africa	Black	Married	Graduate/Postgraduate	Self employed	Yes	17	No	18	1	No	Once a month or less	No	No	No	40		Non-SA	Currently Married	350 and above	Tertiary	16-20 yrs	40	446	LSIL	Abnormal	12.9	Yes	Employed	One	0	0	0	0	0	0	0	0	0	0	0	0	0	0	0	0	0
165	960	1	Outside South Africa	Black	Married	Incomplete Secondary	Employed part-time	Yes	14	Yes	5	1	No	Never	No	No	No		960	Non-SA	Currently Married	350 and above	Secondary	10-15 yrs	165	960	Normal	Normal		No	Employed	One	0	0	0	0	0	0	0	0	0	0	0	0	0	0	0	0	0
0	751	1	Gauteng	Black	Single	Incomplete Secondary	Unemployed	Yes	17	No	50	1	No	2 to 4 times a month	No	Yes	No		751	SA	Not married	350 and above	Secondary	16-20 yrs	0	751	ASCUS	Abnormal	93.6	Yes	unemployed	One	No	0	0	0	0	0	0	0	0	0	0	0	0	0	0	0	0
0	329	1	Gauteng	Black	Single	Incomplete Secondary	Self employed	Yes	19	No	20	1	No	2 to 4 times a month	No	No	No		329	SA	Not married	Less than 350	Secondary	16-20 yrs	0	329	ASCUS	Abnormal	30.7333	Yes	Employed	One	No	0	0	0	0	0	0	0	0	0	0	0	0	0	0	0	0
40	373	1	Gauteng	Black	Single	Completed Secondary	Employed full-time	Yes	19	No	5	1	No	Never	No	No	No	40		SA	Not married	350 and above	Secondary	16-20 yrs	40	373	ASCUS	Abnormal	50.5333	No	Employed	One	No	0	0	0	0	0	0	0	0	0	0	0	0	0	0	0	0
40	405	1	Gauteng	Black	Single	Completed Secondary	Unemployed	Yes	18	No	70	1	No	Never	Yes	No	No	40		SA	Not married	350 and above	Secondary	16-20 yrs										1	0	1	1	0	0	0	0	0	0	0	0	0	0	0	0
9731	123	1	Gauteng	Black	Widowed	Incomplete Secondary	Unemployed	Yes	18	No	999	1	No	Once a month or less	No	No	No	9731		SA	Not married	Less than 350	Secondary	16-20 yrs	9731	123	LSIL	Abnormal	13.4333	Yes	unemployed	One	No	0	0	0	0	0	0	0	0	0	0	0	0	0	0	1	0
40	368	1	Kwazulu Natal	Black	Married	Completed Secondary	Employed full-time	Yes	15	No	170	2	No	Once a month or less	No	No	No		368	SA	Currently Married	350 and above	Secondary	10-15 yrs	40	368	Normal	Normal	68.7667	Yes	Employed	More than one	No	0	0	0	0	0	0	0	0	0	0	0	0	0	0	0	0
5675	669	1	Gauteng	Black	Single	Primary	Employed full-time	Yes	16	No	60	6	No	2 to 4 times a month	No	No	No	-99	669	SA	Not married	350 and above	Primary	16-20 yrs	-99	614	Normal	Normal		Yes	Employed	More than one	0	0	0	0	0	0	0	0	0	0	0	0	0	0	0	0	0
0	408	1	Kwazulu Natal	Black	Single	Incomplete Secondary	Employed full-time	Yes	19	No	5	1	No	Never	No	No	No	0		SA	Not married	350 and above	Secondary	16-20 yrs	0	408	Normal	Normal	116.167	No	Employed	One	No	0	0	0	0	0	0	0	0	0	0	0	0	0	0	0	0
38792	78	1	Outside South Africa	Black	Married	Incomplete Secondary	Self employed	Yes	21	No	3	1	No	Never	No	No	Yes	18489		Non-SA	Currently Married	Less than 350	Secondary	>20 yrs	18489	101			7.13333	No	Employed	One	No	0	0	0	0	0	0	0	0	0	0	0	0	0	0	0	0
0	556	1	Kwazulu Natal	Black	Divorced/Separated	Incomplete Secondary	Unemployed	Yes	17	No	100	1	No	Never	No	No	No	0		SA	Not married	350 and above	Secondary	16-20 yrs	0	556			29.4667	No	unemployed	One	No	0	0	0	0	0	0	0	0	0	0	0	0	0	0	0	0
0	436	1	Gauteng	Black	Married	Completed Secondary	Unemployed	Yes	18	No	18	1	No	Once a month or less	No	Yes	No	0		SA	Currently Married	350 and above	Secondary	16-20 yrs	0	436			28.4667	Yes	unemployed	One	No	0	0	0	0	0	0	0	0	0	0	0	0	0	0	0	0
0	607	1	Gauteng	Black	Single	Primary	Unemployed	Yes	15	No	600	1	No	Never	Yes	No	No	0		SA	Not married	350 and above	Primary	10-15 yrs	0	607	Normal	Normal	38.7	No	unemployed	One	No	0	0	0	0	0	0	0	0	0	0	0	0	0	0	0	0
0	494	1	Limpopo	Black	Single	Completed Secondary	Employed part-time	Yes	20	No	9	2	No	Never	No	No	No	0		SA	Not married	350 and above	Secondary	16-20 yrs	0	494	LSIL	Abnormal	69.4333	No	Employed	More than one	No	0	0	0	0	0	0	0	0	0	0	0	0	0	0	0	0
0	485	1	Outside South Africa	Black	Married	Completed Secondary	Self employed	Yes	22	No	500	1	No	Once a month or less	Yes	Yes	No	0		Non-SA	Currently Married	350 and above	Secondary	>20 yrs	0	485	Normal	Normal	31.7333	Yes	Employed	One	0	0	0	0	0	0	0	0	0	0	0	0	0	0	0	0	0
908	412	1	Outside South Africa	Black	Single	Completed Secondary	Employed part-time	Yes	18	No	6	1	No	Never	No	No	No	908		Non-SA	Not married	350 and above	Secondary	16-20 yrs	908	412	ASCUS	Abnormal	18.8333	No	Employed	One	No	0	0	0	0	0	0	0	0	0	0	0	0	0	0	0	0
0	494	1	Gauteng	Black	Single	Completed Secondary	Employed full-time	Yes	22	No	4	1	Yes	Never	No	No	No	0		SA	Not married	350 and above	Secondary	>20 yrs	0	494	LSIL	Abnormal	63.3	No	Employed	One	No	0	0	1	1	0	0	0	1	1	0	0	0	0	0	0	0
56337	448	1	Kwazulu Natal	Black	Single	Incomplete Secondary	Employed part-time	Yes	18	No	999	1	Yes	Once a month or less	No	No	No	56337		SA	Not married	350 and above	Secondary	16-20 yrs	56337	448	Cytology			Yes	Employed	One	No	1	0	1	1	1	0	0	1	0	1	1	0	0	1	1	1
0	343	1	North West	Black	Married	Primary	Employed full-time	Yes	19	No	150	1	No	Never	No	No	No	0		SA	Currently Married	Less than 350	Primary	16-20 yrs	0	343	Normal	Normal	70.4	No	Employed	One	No	0	0	0	0	0	0	0	0	0	0	0	0	0	0	0	0
0	368	1	Free State	Black	Single	Graduate/Postgraduate	Unemployed	Yes	12	No	200	1	Yes	Once a month or less	No	No	No	0		SA	Not married	350 and above	Tertiary	10-15 yrs	0	368	ASCUS	Abnormal	12.6333	Yes	unemployed	One	No	0	0	0	0	0	0	0	0	0	0	0	0	1	0	0	1
0	228	1	Mpumalanga	Black	Divorced/Separated	Completed Secondary	Unemployed	Yes	16	No	500	1	No	2 to 4 times a month	No	No	No	0		SA	Not married	Less than 350	Secondary	16-20 yrs	0	228	Cytology		56.2667	Yes	unemployed	One	No	0	0	0	0	0	0	0	0	0	0	0	0	0	0	0	0
42943	658	1	Outside South Africa	Black	Single	Completed Secondary	Employed full-time	Yes	14	No	100	1	No	2 to 4 times a month	No	No	No		658	Non-SA	Not married	350 and above	Secondary	10-15 yrs	42943	658	LSIL	Abnormal		Yes	Employed	One	No	0	0	0	0	0	0	0	0	0	1	1	0	1	0	0	0
0	193	1	Eastern Cape	Black	Single	Incomplete Secondary	Employed part-time	Yes	17	No	60	2	No	Never	No	No	No	0		SA	Not married	Less than 350	Secondary	16-20 yrs	0	193	ASCUS	Abnormal	5.53333	No	Employed	More than one	No	0	0	0	0	0	0	0	0	0	0	0	0	0	0	0	0
0	552	1	Outside South Africa	Black	Single	Completed Secondary	Employed full-time	Yes	22	No	20	1	No	Never	No	Yes	No	0		Non-SA	Not married	350 and above	Secondary	>20 yrs	0	552	Normal	Normal	7.76667	No	Employed			0	0	0	0	0	0	0	0	0	0	0	0	0	0	0	0
0	507	1	Gauteng	Black	Widowed	Incomplete Secondary	Unemployed	Yes	14	No	300	1	No	Once a month or less	Yes	No	No	0		SA	Not married	350 and above	Secondary	10-15 yrs	0	507	Normal	Normal	31.4667	Yes	unemployed	One	No	0	0	0	0	0	0	0	0	0	0	0	0	0	0	0	0
0	119	1	Gauteng	Black	Single	Incomplete Secondary	Unemployed	Yes	18	No	4	1	No	Never	No	No	Yes			SA	Not married	Less than 350	Secondary	16-20 yrs	0	119	LSIL	Abnormal	21.7333	No	unemployed	One	No	0	1	0	0	0	0	0	0	0	0	0	0	0	0	0	0
40	691	1	Outside South Africa	Black	Divorced/Separated	Incomplete Secondary	Employed part-time	Yes	15	No	40	1	No	Once a month or less	Yes	Yes	No	40		Non-SA	Not married	350 and above	Secondary	10-15 yrs	40	691	Normal	Normal	6.96667	Yes	Employed			0	0	0	0	0	0	0	0	0	0	0	0	0	0	0	0
40	928	1	Gauteng	Black	Single	Primary	Employed part-time	Yes	16	No	18	1	No	4 or more times a week	Yes	Yes	No	40		SA	Not married	350 and above	Primary	16-20 yrs	40	928	ASCUS	Abnormal	44.5	Yes	Employed	One	No	0	0	0	0	0	0	0	0	0	0	0	0	0	0	0	0
0	500	1	Outside South Africa	Black	Single	Incomplete Secondary	Employed full-time	Yes	18	No	20	2	No	Never	No	No	No	0		Non-SA	Not married	350 and above	Secondary	16-20 yrs	0	500	Cytology		34.8667	No	Employed	More than one	No	0	0	0	0	0	0	0	0	0	0	0	0	0	0	0	0
40	792	1	Eastern Cape	Black	Single	Incomplete Secondary	Self employed	Yes	14	No	999	1	No	Once a month or less	No	Yes	No	40		SA	Not married	350 and above	Secondary	10-15 yrs	40	792	LSIL	Abnormal	105.4	Yes	Employed	One	No	0	0	0	0	0	0	0	0	0	0	0	0	0	0	0	0
0	813	1	Gauteng	Black	Single	Graduate/Postgraduate	Employed part-time	Yes	18	No	30	1	No	Once a month or less	Yes	No	No	0		SA	Not married	350 and above	Tertiary	16-20 yrs	0	813	LSIL	Abnormal	25.2	Yes	Employed	One	No	0	0	0	0	0	0	0	0	0	0	0	0	0	0	0	0
40	678	1	Kwazulu Natal	Black	Single	Incomplete Secondary	Employed part-time	Yes	15	No	190	1	No	Once a month or less	No	No	No	40		SA	Not married	350 and above	Secondary	10-15 yrs	40	678	ASCUS	Abnormal	118.633	Yes	Employed	One	0	0	0	0	0	0	0	0	0	0	0	0	0	0	0	0	0
40	298	1	Outside South Africa	Black	Single	Primary	Employed full-time	Yes	22	No	5	1	No	Never	No	No	No	40		Non-SA	Not married	Less than 350	Primary	>20 yrs	40	298	Cytology		26.3333	No	Employed	One	No	0	0	0	0	0	0	0	0	0	0	0	0	0	0	0	0
178901	173	1	Kwazulu Natal	Black	Widowed	Primary	Unemployed	Yes	26	No	999	1	No	Once a month or less	No	Yes	No	178901		SA	Not married	Less than 350	Primary	>20 yrs	178901	173	LSIL	Abnormal	11.8333	Yes	unemployed	One	No	0	0	0	0	0	0	0	0	0	0	0	0	0	0	0	0
13152	451	1	Outside South Africa	Black	Single	Completed Secondary	Unemployed	Yes	18	No	15	1	No	2 to 4 times a month	No	No	Yes	13152		Non-SA	Not married	350 and above	Secondary	16-20 yrs	13152	451	Cytology			Yes	unemployed	One	No
-99	103	1	Kwazulu Natal	Black	Married	Completed Secondary	Employed part-time	Yes	16	No	15	1	No	Once a month or less	No	No	No	-99		SA	Currently Married	Less than 350	Secondary	16-20 yrs	-99	103	Normal	Normal	11.8333	Yes	Employed	One	No
40	180	1	Outside South Africa	Black	Married	Incomplete Secondary	Employed full-time	Yes	17	No	10	1	No	Once a month or less	Yes	Yes	Yes	40		Non-SA	Currently Married	Less than 350	Secondary	16-20 yrs	40	180	Normal	Normal	5.73333	Yes	Employed	One	No
0	399	1	Outside South Africa	Black	Married	Completed Secondary	Employed full-time	Yes	18	No	15	1	No	2 to 3 times a week	No	No	No	0		Non-SA	Currently Married	350 and above	Secondary	16-20 yrs	0	399	LSIL	Abnormal	27.5667	Yes	Employed	One	No	0	0	0	0	1	0	0	0	0	0	0	0	0	0	0	0
0	584	1	Outside South Africa	Black	Married	Incomplete Secondary	Employed full-time	Yes	24	No	50	1	No	Once a month or less	No	Yes	No	0	584	Non-SA	Currently Married	350 and above	Secondary	>20 yrs	0	894	LSIL	Abnormal	58.0333	Yes	Employed	One	No	0	0	0	0	0	0	0	0	0	0	0	0	0	0	0	0
0	496	1	Outside South Africa	Black	Married	Completed Secondary	Employed full-time	Yes	20	No	8	1	No	Never	No	No	No	0		Non-SA	Currently Married	350 and above	Secondary	16-20 yrs	0	496	Normal	Normal	50.8667	No	Employed	One	No	0	0	0	0	0	0	0	0	0	0	0	0	0	0	0	0
13713	411	1	Kwazulu Natal	Black	Single	Incomplete Secondary	Employed full-time	Yes	20	No	6	1	No	Once a month or less	Yes	Yes	No		411	SA	Not married	350 and above	Secondary	16-20 yrs	13713	411	Cytology			Yes	Employed	One	No	0	0	0	0	0	0	0	0	0	0	0	0	0	0	0	0
79235	494	1	Outside South Africa	Black	Single	Incomplete Secondary	Employed full-time	Yes	19	Yes	20	1	No	2 to 4 times a month	Yes	No	No		494	Non-SA	Not married	350 and above	Secondary	16-20 yrs	79235	494	LSIL	Abnormal		Yes	Employed	One	0	0	0	0	0	0	0	0	0	0	0	0	0	0	0	0	0
0	187	1	Outside South Africa	Black	Divorced/Separated	Incomplete Secondary	Self employed	Yes	13	No	7	3	No	Never	No	No	No	0		Non-SA	Not married	Less than 350	Secondary	10-15 yrs	0	187			23.4333	No	Employed	More than one	No	0	0	0	0	0	0	0	0	0	0	0	0	0	0	0	0
2766	457	1	Gauteng	Black	Single	Primary	Unemployed	Yes	13	Yes	8	2	No	2 to 4 times a month	Yes	No	No		457	SA	Not married	350 and above	Primary	10-15 yrs	2766	457	ASCUS	Abnormal		Yes	unemployed	More than one	0	0	0	0	0	0	0	0	0	0	0	0	0	0	0	0	0
40	655	1	Eastern Cape	Black	Single	Graduate/Postgraduate	Self employed	Yes	10	No	50	1	Yes	Never	No	Yes	No	40		SA	Not married	350 and above	Tertiary	Less than 10	40	655	LSIL	Abnormal	54.0333	No	Employed	One	No	1	0	0	0	1	0	0	0	0	0	0	0	0	0	1	0
0	314	1	Outside South Africa	Black	Single	Primary	Unemployed	Yes	16	No	60	1	No	Once a month or less	No	No	No	0		Non-SA	Not married	Less than 350	Primary	16-20 yrs	0	314	Normal	Normal	12.4333	Yes	unemployed	One	No	0	0	0	0	1	0	0	0	0	0	0	0	0	0	0	0
0	168	1	Gauteng	Black	Married	Primary	Employed full-time	Yes	18	No	26	1	No	Never	No	No	No	0		SA	Currently Married	Less than 350	Primary	16-20 yrs	0	168	LSIL	Abnormal	7.83333	No	Employed	One	No	0	0	1	1	0	0	0	0	0	0	0	0	0	0	0	0
0	241	1	Outside South Africa	Black	Married	Completed Secondary	Employed full-time	Yes	13	No	120	2	No	Once a month or less	No	No	No	0		Non-SA	Currently Married	Less than 350	Secondary	10-15 yrs	0	241	LSIL	Abnormal	10.9667	Yes	Employed	More than one	0	0	0	0	0	0	0	0	0	0	0	0	0	0	0	0	0
40	280	1	Kwazulu Natal	Black	Single	Incomplete Secondary	Unemployed	Yes	19	No	6	1	No	Never	Yes	No	No	40		SA	Not married	Less than 350	Secondary	16-20 yrs	40	280	LSIL	Abnormal	5.36667	No	unemployed	One	No	1	0	0	0	0	0	0	1	0	0	0	0	0	0	0	0
52	547	1	Gauteng	Black	Single	Graduate/Postgraduate	Unemployed	Yes	14	No	20	1	No	Never	Yes	No	No	52		SA	Not married	350 and above	Tertiary	10-15 yrs	52	547	Normal	Normal	50.0333	No	unemployed	One	No	0	0	0	0	0	0	0	0	0	0	0	0	0	0	0	0
0	452	1	Outside South Africa	Black	Married	Completed Secondary	Employed full-time	Yes	21	Yes	6	1	No	Never	No	No	No	0		Non-SA	Currently Married	350 and above	Secondary	>20 yrs	0	452	Normal	Normal		No	Employed	One	No	1	0	0	0	0	0	0	0	0	0	0	0	0	0	0	0
0	383	1	Limpopo	Black	Married	Incomplete Secondary	Employed full-time	Yes	22	No	11	1	No	Never	No	Yes	No	0		SA	Currently Married	350 and above	Secondary	>20 yrs	0	383	ASCUS	Abnormal	29.7667	No	Employed	One	No	0	0	0	0	0	0	0	0	0	0	0	0	0	0	0	0
0	673	1	Mpumalanga	Black	Married	Incomplete Secondary	Unemployed	Yes	19	No	32	1	No	Once a month or less	No	No	No	0		SA	Currently Married	350 and above	Secondary	16-20 yrs	0	673	LSIL	Abnormal	102	Yes	unemployed			0	0	0	0	0	0	0	0	0	0	0	0	0	0	0	0
15761	493	1	Kwazulu Natal	Black	Single	Graduate/Postgraduate	Self employed	Yes	13	No	999	3	No	4 or more times a week	Yes	No	No	10835		SA	Not married	350 and above	Tertiary	10-15 yrs	15761	493	Cytology			Yes	Employed	More than one	No	0	0	0	0	0	0	0	0	0	0	0	0	0	0	0	0
37886	501	1	Outside South Africa	Black	Single	Completed Secondary	Unemployed	Yes	16	No	38	1	No	Never	No	No	No		501	Non-SA	Not married	350 and above	Secondary	16-20 yrs	37886	501	ASCUS	Abnormal		No	unemployed	One	No	0	0	0	0	0	0	0	0	0	0	0	0	0	0	0	0
0	396	1	Outside South Africa	Black	Married	Completed Secondary	Employed full-time	Yes	7	Yes	130	2	No	Never	No	No	No	0		Non-SA	Currently Married	350 and above	Secondary	Less than 10	0	396	ASCUS	Abnormal	47.2	No	Employed	More than one	No	0	0	0	0	0	0	0	0	0	0	0	0	0	0	0	0
16093	616	1	Kwazulu Natal	Black	Single	Incomplete Secondary	Unemployed	Yes	16	No	200	1	No	2 to 4 times a month	Yes	No	No		616	SA	Not married	350 and above	Secondary	16-20 yrs	16093	616				Yes	unemployed	One	0	1	1	0	0	0	0	0	0	0	0	0	0	0	0	0	0
65	657	1	Outside South Africa	Black	Married	Completed Secondary	Employed full-time	Yes	18	Yes	10	1	No	Never	No	No	No	65		Non-SA	Currently Married	350 and above	Secondary	16-20 yrs	65	657	LSIL	Abnormal		No	Employed	One	No	0	0	0	0	0	0	0	0	0	0	0	0	0	0	0	0
12614	387	1	Outside South Africa	Black	Married	Graduate/Postgraduate	Employed full-time	Yes	22	No	20	2	No	Never	No	Yes	No		387	Non-SA	Currently Married	350 and above	Tertiary	>20 yrs	12614	387	Normal	Normal		No	Employed	More than one	No
0	292	1	Mpumalanga	Black	Married	Primary	Employed full-time	Yes	17	No	30	1	No	Never	No	No	No	0		SA	Currently Married	Less than 350	Primary	16-20 yrs	0	292	LSIL	Abnormal	75.6	No	Employed	One	No	1	0	0	0	0	0	0	0	0	0	0	0	0	0	1	0
0	631	1	Kwazulu Natal	Black	Single	Completed Secondary	Employed full-time	Yes	20	No	8	1	No	Once a month or less	No	No	No	0		SA	Not married	350 and above	Secondary	16-20 yrs	0	631	LSIL	Abnormal	84.0667	Yes	Employed	One	No	0	0	0	0	0	0	0	0	0	0	0	0	0	0	0	0
0	559	1	Kwazulu Natal	Black	Single	Primary	Unemployed	Yes	25	No	3	1	No	Never	No	No	No	0		SA	Not married	350 and above	Primary	>20 yrs	0	559	LSIL	Abnormal	108.267	No	unemployed	One	No	0	0	0	0	0	0	0	0	0	0	0	0	0	0	0	0
40	610	1	Outside South Africa	Black	Single	Completed Secondary	Employed part-time	Yes	17	No	48	1	No	2 to 4 times a month	No	No	Yes	40		Non-SA	Not married	350 and above	Secondary	16-20 yrs	40	610	LSIL	Abnormal	39	Yes	Employed	One	No	0	0	0	0	0	0	0	0	0	0	0	0	0	0	0	0
0	666	1	North West	Black	Single	Incomplete Secondary	Employed full-time	Yes	15	No	30	2	No	Never	No	Yes	No		666	SA	Not married	350 and above	Secondary	10-15 yrs	0	666	Normal	Normal	67.3333	No	Employed			0	0	0	0	0	0	0	0	0	0	0	0	0	0	0	0
121150	381	1	Kwazulu Natal	Black	Single	Completed Secondary	Employed part-time	Yes	19	No	20	3	No	2 to 4 times a month	No	No	Yes		381	SA	Not married	350 and above	Secondary	16-20 yrs	121150	381				Yes	Employed	More than one	No	0	0	0	0	0	0	0	0	0	0	0	0	0	0	0	0
24778	391	1	Outside South Africa	Black	Married	Incomplete Secondary	Self employed	Yes	16	No	8	1	No	Never	No	No	No	24778		Non-SA	Currently Married	350 and above	Secondary	16-20 yrs	24778	391	LSIL	Abnormal		No	Employed	One	No	0	0	0	0	0	0	0	0	0	1	1	0	0	0	0	0
0	231	1	Gauteng	Black	Single	Graduate/Postgraduate	Employed full-time	Yes	19	No	60	1	No	Never	No	Yes	No	0		SA	Not married	Less than 350	Tertiary	16-20 yrs	0	231	ASCUS	Abnormal	11.7	No	Employed			0	0	0	0	0	0	0	0	0	0	0	0	0	0	0	0
2884	1077	1	Limpopo	Black	Married	Completed Secondary	Employed part-time	Yes	15	No	10	1	No	Once a month or less	Yes	Yes	No	2884		SA	Currently Married	350 and above	Secondary	10-15 yrs	2884	1077	LSIL	Abnormal		Yes	Employed	One	No	0	0	0	0	0	0	0	0	0	0	0	0	0	0	0	0
40	764	1	Gauteng	Black	Single	Incomplete Secondary	Unemployed	Yes	21	No	66	1	No	2 to 4 times a month	No	Yes	No	40		SA	Not married	350 and above	Secondary	>20 yrs	40	764	Normal	Normal		Yes	unemployed	One	No	1	0	0	0	0	0	0	0	0	0	0	0	0	0	0	0
40	379	1	Mpumalanga	Black	Single	Incomplete Secondary	Unemployed	Yes	18	No	22	1	No	Once a month or less	No	No	Yes		379	SA	Not married	350 and above	Secondary	16-20 yrs	40	379	Normal	Normal	5.56667	Yes	unemployed	One	0	0	0	0	0	0	0	0	0	0	0	0	0	0	0	0	0
0	355	1	Mpumalanga	Black	Single	Incomplete Secondary	Employed full-time	Yes	16	No	5	1	No	Never	No	No	No	0		SA	Not married	350 and above	Secondary	16-20 yrs	0	355	LSIL	Abnormal	14.8	No	Employed	One	No	0	0	0	0	0	0	0	0	0	0	0	0	0	0	0	0
1759	328	1	Outside South Africa	Black	Married	Incomplete Secondary	Employed full-time	Yes	18	No	20	1	No	Once a month or less	No	No	No	1759		Non-SA	Currently Married	Less than 350	Secondary	16-20 yrs	1759	328	Normal	Normal		Yes	Employed	One	No	0	0	0	0	0	0	0	0	0	0	0	0	0	0	0	0
0	752	1	Gauteng	Black	Single	Incomplete Secondary	Employed part-time	Yes	14	No	17	1	No	Never	No	No	No	0		SA	Not married	350 and above	Secondary	10-15 yrs	0	752	Normal	Normal	56.9667	No	Employed	One	No	0	0	0	0	0	0	0	0	0	0	0	0	0	0	0	0
0	527	1	Free State	Black	Married	Completed Secondary	Employed full-time	Yes	8	Yes	30	1	No	Never	No	No	Yes		527	SA	Currently Married	350 and above	Secondary	Less than 10	0	527	Normal	Normal	78.9667	No	Employed	One	No	0	0	0	0	0	0	0	0	0	0	0	0	0	0	0	0
36846	483	1	Kwazulu Natal	Black	Single	Incomplete Secondary	Employed full-time	Yes	19	No	24	1	No	Once a month or less	Yes	No	No		483	SA	Not married	350 and above	Secondary	16-20 yrs	36846	483	LSIL	Abnormal		Yes	Employed	One	No	0	0	0	0	0	0	0	0	0	0	0	0	0	0	0	0
0	382	1	Outside South Africa	Black	Married	Primary	Employed full-time	Yes	15	No	5	1	No	Never	No	No	No	0		Non-SA	Currently Married	350 and above	Primary	10-15 yrs	0	382	LSIL	Abnormal	40.2667	No	Employed	One	No
0	451	1	Outside South Africa	Black	Single	Incomplete Secondary	Employed part-time	Yes	22	No	30	2	No	Never	No	No	No	0		Non-SA	Not married	350 and above	Secondary	>20 yrs	0	451	Normal	Normal	11.7	No	Employed	More than one	No	0	0	0	0	0	0	0	0	0	0	0	0	0	0	0	0
0	196	1	Mpumalanga	Black	Single	Incomplete Secondary	Employed full-time	Yes	21	No	5	1	No	Never	No	No	Yes	0		SA	Not married	Less than 350	Secondary	>20 yrs	0	196	Normal	Normal	48.6	No	Employed	One	No	0	0	0	0	0	0	0	0	0	0	0	0	0	0	0	0
40	417	1	Outside South Africa	Black	Single	Incomplete Secondary	Self employed	Yes	20	No	72	1	No	Never	No	No	No	40		Non-SA	Not married	350 and above	Secondary	16-20 yrs	40	417	Cytology		33.2667	No	Employed	One	No	0	0	0	0	0	0	0	0	0	0	0	0	0	0	0	0
27315	449	1	Outside South Africa	Black	Single	Incomplete Secondary	Self employed	Yes	20	No	500	5	No	4 or more times a week	No	No	No		449	Non-SA	Not married	350 and above	Secondary	16-20 yrs	27315	449	ASCUS	Abnormal		Yes	Employed	More than one	No
0	383	1	Free State	Black	Single	Completed Secondary	Employed part-time	Yes	14	No	20	2	No	Once a month or less	Yes	Yes	No	0		SA	Not married	350 and above	Secondary	10-15 yrs	0	383	Cytology		15.2	Yes	Employed	More than one	No	0	0	0	0	0	0	0	0	0	0	0	0	0	0	0	0
2079	458	1	Gauteng	Black	Single	Completed Secondary	Unemployed	Yes	17	No	180	1	No	Never	No	No	No	2079		SA	Not married	350 and above	Secondary	16-20 yrs	2079	458	LSIL	Abnormal	125.533	No	unemployed	One	No	0	0	0	0	0	0	0	0	0	0	0	0	0	0	0	0
0	582	1	Gauteng	Black	Single	Incomplete Secondary	Unemployed	Yes	16	No	6	1	No	2 to 4 times a month	Yes	No	No	0		SA	Not married	350 and above	Secondary	16-20 yrs	0	582	ASCUS	Abnormal	87.9667	Yes	unemployed	One	No	0	0	0	0	0	0	0	0	0	0	0	0	0	0	0	0
40	353	1	Gauteng	Black	Married	Completed Secondary	Unemployed	Yes	18	No	8	1	No	Never	No	No	No	40		SA	Currently Married	350 and above	Secondary	16-20 yrs	40	353			108.333	No	unemployed	One	No
0	414	1	Outside South Africa	Black	Married	Completed Secondary	Self employed	Yes	19	No	300	1	No	2 to 4 times a month	No	No	No		414	Non-SA	Currently Married	350 and above	Secondary	16-20 yrs	0	414	LSIL	Abnormal	11.9	Yes	Employed	One	No	0	0	0	0	0	0	0	0	0	0	0	0	0	0	0	0
840	708	1	Outside South Africa	Black	Single	Completed Secondary	Unemployed	Yes	17	No	4	1	No	Never	No	No	No	840		Non-SA	Not married	350 and above	Secondary	16-20 yrs	840	708	Normal	Normal	65.9667	No	unemployed	One	No	0	0	0	0	0	0	0	0	0	0	0	0	0	0	0	0
0	703	1	Outside South Africa	Black	Married	Completed Secondary	Employed full-time	Yes	20	No	7	1	No	Never	No	No	No	0		Non-SA	Currently Married	350 and above	Secondary	16-20 yrs	0	703	Normal	Normal		No	Employed	One	No	0	0	0	0	0	0	0	0	0	0	0	0	0	0	0	0
40	551	1	Kwazulu Natal	Black	Single	Completed Secondary	Unemployed	Yes	15	No	23	1	No	Once a month or less	Yes	No	No	40		SA	Not married	350 and above	Secondary	10-15 yrs	40	551	Normal	Normal	7.9	Yes	unemployed	One	No
0	690	1	Kwazulu Natal	Black	Single	Incomplete Secondary	Employed full-time	Yes	15	No	4	1	No	Never	No	No	Yes	0		SA	Not married	350 and above	Secondary	10-15 yrs	0	690	Normal	Normal	66.8333	No	Employed	One	No	0	0	0	0	0	0	0	0	0	0	0	0	0	0	1	0
0	253	1	Eastern Cape	Black	Single	Incomplete Secondary	Unemployed	Yes	14	No	50	3	No	Never	No	Yes	No	0		SA	Not married	Less than 350	Secondary	10-15 yrs	0	253	ASCUS	Abnormal	22.3333	No	unemployed	More than one	No	0	0	0	0	0	0	0	0	0	0	0	0	0	0	0	0
0	312	1	Kwazulu Natal	Black	Single	Incomplete Secondary	Self employed	Yes	18	No	150	3	No	Never	No	No	Yes	0		SA	Not married	Less than 350	Secondary	16-20 yrs	0	312	Normal	Normal	16.4	No	Employed	More than one	No	0	0	0	0	0	0	0	0	0	0	0	0	0	0	0	0
0	265	1	Kwazulu Natal	Black	Single	Completed Secondary	Employed full-time	Yes	21	No	5	1	No	Once a month or less	Yes	Yes	Yes	0		SA	Not married	Less than 350	Secondary	>20 yrs	0	265	Normal	Normal	15.3667	Yes	Employed	One	No	1	0	0	0	0	0	0	0	0	0	0	0	0	0	0	0
75	351	1	Kwazulu Natal	Black	Married	Graduate/Postgraduate	Employed full-time	Yes	17	No	6	1	No	Never	No	No	No	75		SA	Currently Married	350 and above	Tertiary	16-20 yrs	75	351	LSIL	Abnormal	2.86667	No	Employed	One	No
40	341	1	Outside South Africa	Black	Married	Incomplete Secondary	Employed full-time	Yes	15	No	28	1	No	Never	No	No	No	40		Non-SA	Currently Married	Less than 350	Secondary	10-15 yrs	40	341	Normal	Normal	31.3333	No	Employed	One	No
0	140	1	Limpopo	Black	Married	Incomplete Secondary	Employed part-time	Yes	21	Yes	30	1	No	Once a month or less	No	Yes	No	0		SA	Currently Married	Less than 350	Secondary	>20 yrs	0	140	LSIL	Abnormal	6.96667	Yes	Employed	One	No	0	0	0	0	0	1	1	0	0	0	0	0	0	0	0	0
40	217	1	Outside South Africa	Black	Married	Incomplete Secondary	Employed full-time	Yes	23	No	3	1	No	Never	No	No	No	40		Non-SA	Currently Married	Less than 350	Secondary	>20 yrs	40	217	Normal	Normal	33.5667	No	Employed	One	No	0	0	0	0	0	0	0	0	0	0	0	0	0	0	0	0
0	303	1	Gauteng	Black	Single	Completed Secondary	Unemployed	Yes	18	No	700	1	No	Never	No	No	No	0		SA	Not married	Less than 350	Secondary	16-20 yrs	0	303	ASCUS	Abnormal	19.2333	No	unemployed	One	No	0	0	0	0	0	0	0	0	0	0	0	0	0	0	0	0
83192	142	1	Gauteng	Black	Widowed	Incomplete Secondary	Unemployed	Yes	25	No	120	1	No	Once a month or less	No	No	No	83192		SA	Not married	Less than 350	Secondary	>20 yrs	83192	142	Normal	Normal	32.4	Yes	unemployed	One	No	0	0	0	0	0	0	0	0	0	0	0	0	0	0	0	0
340	402	1	Gauteng	Black	Single	Incomplete Secondary	Employed part-time	Yes	19	No	700	1	No	2 to 4 times a month	Yes	No	No	340		SA	Not married	350 and above	Secondary	16-20 yrs	340	402	Normal	Normal	59.8333	Yes	Employed	One	No	1	0	0	0	0	0	0	0	0	0	0	0	0	0	0	0
40	265	1	Outside South Africa	Black	Married	Incomplete Secondary	Employed full-time	Yes	23	No	6	1	No	Never	No	No	Yes	40		Non-SA	Currently Married	Less than 350	Secondary	>20 yrs	40	265	Normal	Normal	5.23333	No	Employed	One	No	1	0	0	0	0	0	0	0	0	0	0	0	0	0	0	0
13617	575	1	Gauteng	Black	Single	Incomplete Secondary	Unemployed	Yes	14	No	50	1	No	2 to 4 times a month	Yes	No	No	13617		SA	Not married	350 and above	Secondary	10-15 yrs	13617	575	Cytology			Yes	unemployed	One	0
40	369	1	Gauteng	Black	Single	Incomplete Secondary	Employed part-time	Yes	14	No	999	4	No	2 to 4 times a month	Yes	No	No	40		SA	Not married	350 and above	Secondary	10-15 yrs	40	369	Normal	Normal	52.7333	Yes	Employed
40	563	1	Limpopo	Black	Married	Incomplete Secondary	Employed full-time	Yes	20	No	16	1	No	Never	No	Yes	No	40		SA	Currently Married	350 and above	Secondary	16-20 yrs	40	563	Normal	Normal	3.46667	No	Employed	One	No	0	0	0	0	0	0	0	0	0	0	0	0	0	0	0	0
40	587	1	Gauteng	Black	Married	Incomplete Secondary	Employed full-time	Yes	19	No	3	1	No	Once a month or less	No	No	No	40		SA	Currently Married	350 and above	Secondary	16-20 yrs	40	587	ASCUS	Abnormal	76.3667	Yes	Employed	One	No	1	0	0	0	0	0	0	0	0	0	0	0	0	0	0	0
59563	184	1	Outside South Africa	Black	Single	Incomplete Secondary	Employed part-time	Yes	19	No	15	1	No	Once a month or less	No	No	No	59563		Non-SA	Not married	Less than 350	Secondary	16-20 yrs	59563	184	ASCUS	Abnormal	43	Yes	Employed	One	No	0	0	0	0	0	0	0	0	0	0	0	0	0	0	0	0
0	380	1	Kwazulu Natal	Black	Single	Completed Secondary	Unemployed	Yes	17	No	34	1	No	Never	No	Yes	No	0		SA	Not married	350 and above	Secondary	16-20 yrs	0	380	Normal	Normal	22.7333	No	unemployed	One	No	0	0	0	0	0	0	0	0	0	0	0	0	0	0	0	0
40	362	1	Gauteng	Black	Single	Incomplete Secondary	Self employed	Yes	11	No	30	1	No	2 to 4 times a month	Yes	No	No	40		SA	Not married	350 and above	Secondary	10-15 yrs	40	362	LSIL	Abnormal	8.76667	Yes	Employed	One	No	0	0	0	0	0	0	0	0	0	0	0	0	0	0	0	0
0	367	1	Gauteng	Black	Single	Incomplete Secondary	Employed part-time	Yes	16	No	17	2	No	Never	No	No	No	0		SA	Not married	350 and above	Secondary	16-20 yrs	0	367	ASCUS	Abnormal	140.4	No	Employed	More than one	No	0	0	0	0	0	0	0	0	0	0	0	0	0	0	0	0
0	399	1	Gauteng	Black	Single	Incomplete Secondary	Unemployed	Yes	20	No	80	1	No	Once a month or less	Yes	No	No	0		SA	Not married	350 and above	Secondary	16-20 yrs	0	399			12.5667	Yes	unemployed	One	No	0	0	0	0	0	0	0	0	0	0	0	0	0	0	0	0
40	434	1	Gauteng	Black	Married	Primary	Employed part-time	Yes	18	No	700	1	No	Once a month or less	Yes	Yes	No	40		SA	Currently Married	350 and above	Primary	16-20 yrs	40	434	Normal	Normal	65.4	Yes	Employed	One	No	0	0	0	0	0	0	0	0	0	0	0	0	0	0	0	0
0	529	1	Gauteng	Black	Single	Primary	Unemployed	Yes	22	No	999	1	No	2 to 4 times a month	Yes	Yes	No	0		SA	Not married	350 and above	Primary	>20 yrs	0	529	LSIL	Abnormal	55.2333	Yes	unemployed	One	No	0	1	0	0	0	0	0	0	0	0	0	0	0	0	1	0
40	318	1	Outside South Africa	Black	Married	Incomplete Secondary	Employed full-time	Yes	17	No	12	1	No	Never	No	No	No	40		Non-SA	Currently Married	Less than 350	Secondary	16-20 yrs	40	318	Normal	Normal	16.7333	No	Employed	One	No	0	0	0	0	0	0	0	0	0	0	0	0	0	0	0	0
48	525	1	Gauteng	Black	Single	Completed Secondary	Unemployed	Yes	17	No	4	1	No	Once a month or less	No	No	No	48		SA	Not married	350 and above	Secondary	16-20 yrs	48	525	LSIL	Abnormal	18.9333	Yes	unemployed	One	No	0	0	0	0	0	0	0	0	0	0	0	0	0	0	0	0
31874	462	1	Outside South Africa	Black	Married	Completed Secondary	Employed full-time	Yes	15	No	11	1	No	Once a month or less	No	No	No		462	Non-SA	Currently Married	350 and above	Secondary	10-15 yrs	31874	462	Cytology			Yes	Employed	One	No	0	0	0	0	0	0	0	0	0	0	0	0	0	0	0	0
829	236	1	Kwazulu Natal	Black	Married	Primary	Employed full-time	Yes	20	No	5	1	No	Never	No	No	No		236	SA	Currently Married	Less than 350	Primary	16-20 yrs	829	236	Normal	Normal	4.26667	No	Employed	One	No	0	0	0	0	0	0	0	0	0	0	0	0	0	0	0	0
7811	712	1	Kwazulu Natal	Black	Single	Primary	Self employed	Yes	15	No	50	1	No	4 or more times a week	Yes	No	No	7811		SA	Not married	350 and above	Primary	10-15 yrs	7811	712	Normal	Normal		Yes	Employed	One	0	0	0	0	0	0	0	0	0	0	0	0	0	0	0	0	0
40	618	1	Outside South Africa	Black	Married	Primary	Employed part-time	Yes	23	No	12	1	No	Never	No	No	Yes	40		Non-SA	Currently Married	350 and above	Primary	>20 yrs	40	618	Normal	Normal	6.7	No	Employed	One	No	0	0	0	0	0	0	0	0	0	0	0	0	0	0	0	0
40	1337	1	Outside South Africa	Black	Married	Incomplete Secondary	Employed full-time	Yes	16	No	999	1	No	2 to 4 times a month	No	No	No	40		Non-SA	Currently Married	350 and above	Secondary	16-20 yrs	40	1337	Normal	Normal	54.6	Yes	Employed	One	No	0	0	0	0	0	0	0	0	0	0	0	0	0	0	0	0
40	561	1	Gauteng	Black	Single	Incomplete Secondary	Self employed	Yes	15	No	40	2	No	Once a month or less	Yes	No	No	40		SA	Not married	350 and above	Secondary	10-15 yrs	40	561	Normal	Normal	29.3333	Yes	Employed	More than one	No	1	0	0	0	0	0	0	0	0	0	0	0	0	0	1	0
0	488	1	Kwazulu Natal	Black	Single	Incomplete Secondary	Unemployed	Yes	17	No	15	2	No	Never	No	No	No	0		SA	Not married	350 and above	Secondary	16-20 yrs	0	488			43.5333	No	unemployed	More than one	No	0	0	0	0	0	0	0	0	0	0	0	0	0	0	0	0
0	507	1	Gauteng	Black	Married	Incomplete Secondary	Unemployed	Yes	18	No	10	1	No	2 to 3 times a week	Yes	No	No	0		SA	Currently Married	350 and above	Secondary	16-20 yrs	0	507	Normal	Normal	53.7	Yes	unemployed	One	0	0	0	0	0	0	0	0	0	0	0	0	0	0	0	0	0
0	202	1	Gauteng	Black	Single	Incomplete Secondary	Unemployed	Yes	19	No	900	3	No	Once a month or less	No	No	No	0		SA	Not married	Less than 350	Secondary	16-20 yrs	0	202	Normal	Normal	21.2667	Yes	unemployed	More than one	0	0	0	0	0	0	0	0	0	0	0	0	0	0	0	0	0
40	407	1	Gauteng	Black	Single	Incomplete Secondary	Unemployed	Yes	13	No	38	1	No	2 to 4 times a month	Yes	No	No	40		SA	Not married	350 and above	Secondary	10-15 yrs	40	407	Normal	Normal	67.9333	Yes	unemployed	One	No
		1	Kwazulu Natal	Black	Single	Incomplete Secondary	Employed part-time	Yes	17	No	20	1	No	Once a month or less	No	No	Yes			SA	Not married		Secondary	16-20 yrs						Yes	Employed	One	No
0	428	1	Outside South Africa	Black	Married	Incomplete Secondary	Self employed	Yes	20	No	10	1	No	Never	No	No	No	0		Non-SA	Currently Married	350 and above	Secondary	16-20 yrs	0	428	Normal	Normal	82.0667	No	Employed	One	No	0	0	0	0	0	0	0	0	0	0	0	0	0	0	0	0
48602	114	1	Gauteng	Black	Divorced/Separated	Incomplete Secondary	Unemployed	Yes	13	No	300	4	No	Never	No	No	Yes		114	SA	Not married	Less than 350	Secondary	10-15 yrs	48602	114	Normal	Normal	6.96667	No	unemployed	More than one	0	1	0	1	1	0	1	1	0	0	0	0	0	0	1	0	0
0	569	1	Gauteng	Black	Married	Graduate/Postgraduate	Employed part-time	Yes	15	No	24	1	No	Never	No	No	No	0		SA	Currently Married	350 and above	Tertiary	10-15 yrs	0	569	Normal	Normal		No	Employed	One	No	0	0	0	0	0	0	0	0	0	0	0	0	0	0	0	0
13518	871	1	Kwazulu Natal	Black	Divorced/Separated	Completed Secondary	Employed full-time	Yes	19	No	200	3	No	Once a month or less	Yes	No	No	13518		SA	Not married	350 and above	Secondary	16-20 yrs	13518	871	LSIL	Abnormal		Yes	Employed	More than one	No	0	0	0	0	0	0	0	0	0	0	0	0	0	0	0	0
40	559	1	Outside South Africa	Black	Single	Incomplete Secondary	Employed full-time	Yes	18	No	200	1	No	Never	Yes	Yes	No	40		Non-SA	Not married	350 and above	Secondary	16-20 yrs	40	559	ASCUS	Abnormal	65.9	No	Employed	One	No	0	0	0	0	0	0	0	0	0	0	0	0	0	0	0	0
1098	135	1	Gauteng	Black	Single	Completed Secondary	Unemployed	Yes	17	No	25	3	No	Once a month or less	No	No	No			SA	Not married	Less than 350	Secondary	16-20 yrs	1098	135	ASCUS	Abnormal	14.3	Yes	unemployed	More than one	No	0	0	0	0	0	0	0	0	0	0	0	0	0	0	0	0
32325	672	1	Gauteng	Black	Single	Primary	Unemployed	Yes	17	No	300	1	No	Once a month or less	Yes	No	No	32325		SA	Not married	350 and above	Primary	16-20 yrs	32325	672	ASCUS	Abnormal		Yes	unemployed	One	No	0	0	0	0	0	0	0	0	0	0	0	0	0	0	0	0
129	396	1	Kwazulu Natal	Black	Single	Primary	Employed full-time	Yes	17	No	500	1	No	Never	No	No	Yes	129		SA	Not married	350 and above	Primary	16-20 yrs	129	396	Normal	Normal	8.23333	No	Employed	One	No	0	0	0	0	0	0	0	0	0	0	0	0	0	0	0	0
60865	346	1	Gauteng	Black	Single	Incomplete Secondary	Employed part-time	Yes	16	No	50	3	No	Once a month or less	Yes	No	No		346	SA	Not married	Less than 350	Secondary	16-20 yrs	60865	346	Normal	Normal		Yes	Employed	More than one	No	0	0	0	0	0	0	0	0	0	0	0	0	0	0	0	0
0	395	1	Gauteng	Black	Single	Incomplete Secondary	Unemployed	Yes	15	No	10	1	No	2 to 4 times a month	Yes	No	No	0		SA	Not married	350 and above	Secondary	10-15 yrs	0	395	ASCUS	Abnormal	13.2333	Yes	unemployed	One	No	0	0	0	0	0	0	0	0	0	0	0	0	0	0	0	0
33015	158	1	Outside South Africa	Black	Married	Incomplete Secondary	Employed full-time	Yes	21	No	4	1	No	Never	No	No	No	33015		Non-SA	Currently Married	Less than 350	Secondary	>20 yrs	33015	158	Normal	Normal	36.5667	No	Employed	One	No
0	657	1	Gauteng	Black	Divorced/Separated	Graduate/Postgraduate	Employed full-time	Yes	16	No	50	15	No	2 to 4 times a month	No	No	No	0		SA	Not married	350 and above	Tertiary	16-20 yrs	0	657	Normal	Normal	9	Yes	Employed	More than one	No	0	0	0	0	0	0	0	0	0	0	0	0	0	0	0	0
0	506	1	Limpopo	Black	Married	Completed Secondary	Employed full-time	Yes	17	No	25	1	No	Never	No	Yes	No	0		SA	Currently Married	350 and above	Secondary	16-20 yrs	0	506	ASCUS	Abnormal	78.2	No	Employed	One	No	0	0	0	0	0	0	0	0	0	0	0	0	0	0	0	0
0	343	1	North West	Black	Widowed	Completed Secondary	Employed full-time	Yes	14	No	300	3	No	Once a month or less	No	Yes	No	0		SA	Not married	Less than 350	Secondary	10-15 yrs	0	343	ASCUS	Abnormal	79.2333	Yes	Employed	More than one	No	0	0	0	0	0	0	0	0	0	0	0	0	0	0	0	0
0	906	1	Gauteng	Black	Single	Incomplete Secondary	Employed full-time	Yes	13	No	90	1	No	Once a month or less	Yes	No	No	0		SA	Not married	350 and above	Secondary	10-15 yrs	0	906	Normal	Normal	106.6	Yes	Employed	One	No	0	0	0	0	0	0	0	0	0	0	0	0	0	0	0	0
0	251	1	Gauteng	Black	Single	Completed Secondary	Unemployed	Yes	16	No	7	1	No	Never	No	No	Yes	0		SA	Not married	Less than 350	Secondary	16-20 yrs	0	251			29.5333	No	unemployed	One	No	1	0	0	0	0	0	0	0	0	0	0	0	0	0	0	0
40	521	1	Gauteng	Black	Single	Incomplete Secondary	Unemployed	Yes	16	No	80	4	No	2 to 4 times a month	Yes	Yes	No	40		SA	Not married	350 and above	Secondary	16-20 yrs	40	521	Normal	Normal	30.7667	Yes	unemployed	More than one	No	0	0	0	0	0	0	0	0	0	0	0	0	0	0	0	0
0	186	1	Kwazulu Natal	Black	Single	Primary	Employed part-time	Yes	16	No	9	1	No	Never	No	No	No	0		SA	Not married	Less than 350	Primary	16-20 yrs	0	186	LSIL	Abnormal	16.5667	No	Employed	One	No	0	0	1	1	0	0	0	0	0	0	0	0	0	1	0	0
422	482	1	Gauteng	Black	Single	Primary	Unemployed	Yes	17	No	500	6	No	Never	Yes	Yes	No	422		SA	Not married	350 and above	Primary	16-20 yrs	422	482	Normal	Normal	14.5333	No	unemployed	More than one	No
40	345	1	Gauteng	Black	Single	Incomplete Secondary	Unemployed	Yes	16	No	999	4	No	Once a month or less	Yes	Yes	No	40		SA	Not married	Less than 350	Secondary	16-20 yrs	40	345	Normal	Normal	29.7667	Yes	unemployed	More than one	No	0	0	0	0	0	0	0	0	0	0	0	0	0	0	0	0
40	206	1	Gauteng	Black	Single	Completed Secondary	Self employed	Yes	16	No	450	10	Yes	2 to 4 times a month	Yes	No	Yes	40		SA	Not married	Less than 350	Secondary	16-20 yrs	40	206			5.83333	Yes	Employed	More than one	No	0	0	1	1	1	0	0	0	0	0	0	1	0	0	0	0
0	491	1	Kwazulu Natal	Black	Married	Primary	Employed full-time	Yes	19	No	47	1	No	Never	No	No	No	0		SA	Currently Married	350 and above	Primary	16-20 yrs	0	491	LSIL	Abnormal	66.3333	No	Employed			0	0	0	0	0	0	0	0	0	0	0	0	0	0	0	0
0	291	1	Kwazulu Natal	Black	Married	Incomplete Secondary	Employed full-time	Yes	15	No	15	1	No	Once a month or less	No	Yes	No	0		SA	Currently Married	Less than 350	Secondary	10-15 yrs	0	291	Normal	Normal	52.3333	Yes	Employed			0	0	0	0	0	0	0	0	0	0	0	0	0	0	0	0
40	320	1	Outside South Africa	Black	Married	Incomplete Secondary	Employed part-time	Yes	17	No	99	1	No	Never	No	No	No	40		Non-SA	Currently Married	Less than 350	Secondary	16-20 yrs	40	320	Normal	Normal	33.0667	No	Employed	One	No	0	0	0	0	0	0	0	0	0	0	0	0	0	0	0	0
		1	Outside South Africa	Black	Married	Incomplete Secondary	Employed full-time	Yes	18	No	2	1	No	Never	No	No	No			Non-SA	Currently Married		Secondary	16-20 yrs			Normal	Normal		No	Employed	One	0	0	0	0	0	0	0	0	0	0	0	0	0	0	0	0	0
1354	476	1	Eastern Cape	Black	Single	Graduate/Postgraduate	Employed full-time	Yes	14	No	999	5	Yes	2 to 3 times a week	Yes	Yes	No		476	SA	Not married	350 and above	Tertiary	10-15 yrs	1354	476	LSIL	Abnormal		Yes	Employed	More than one	No	0	0	1	1	1	0	0	1	1	1	1	0	0	0	1	0
		1	Outside South Africa	Black	Single	Completed Secondary	Self employed	Yes	9	Yes	15	1	No	Never	No	Yes	No			Non-SA	Not married		Secondary	Less than 10			Cytology			No	Employed	One	No
40	270	1	Outside South Africa	Black	Married	Incomplete Secondary	Unemployed	Yes	17	No	80	1	Yes	Never	No	No	No	40		Non-SA	Currently Married	Less than 350	Secondary	16-20 yrs	40	270	ASCUS	Abnormal	19.1333	No	unemployed			0	0	0	0	0	0	0	0	0	0	0	0	0	0	0	0
		1	Kwazulu Natal	Black	Single	Incomplete Secondary	Unemployed	Yes	14	No	999	1	No	2 to 4 times a month	No	No	No			SA	Not married		Secondary	10-15 yrs			Normal	Normal		Yes	unemployed	One	No	0	0	0	0	0	0	0	0	0	0	0	0	0	0	0	0
0	678	1	Kwazulu Natal	Coloured	Single	Primary	Employed part-time	Yes	15	No	999	2	No	Never	No	No	No	0		SA	Not married	350 and above	Primary	10-15 yrs	0	678	Normal	Normal	57.4667	No	Employed	More than one	No	0	0	0	0	0	0	0	0	0	0	0	0	0	0	0	0
0	622	1	Kwazulu Natal	Black	Married	Completed Secondary	Employed full-time	Yes	26	No	7	1	No	Never	No	No	No	0		SA	Currently Married	350 and above	Secondary	>20 yrs	0	622	LSIL	Abnormal	44.4333	No	Employed	One	No	0	0	0	0	0	0	0	0	0	0	0	0	0	0	0	0
0	370	1	Outside South Africa	Black	Widowed	Incomplete Secondary	Employed part-time	Yes	19	No	10	1	No	Never	No	No	No	0		Non-SA	Not married	350 and above	Secondary	16-20 yrs	0	370	LSIL	Abnormal	68.7667	No	Employed	One	No	0	0	0	0	0	0	0	0	0	0	0	0	0	0	0	0
40	361	1	Outside South Africa	Black	Divorced/Separated	Incomplete Secondary	Employed part-time	Yes	18	No	999	2	No	Never	No	No	No	40		Non-SA	Not married	350 and above	Secondary	16-20 yrs	40	361	Normal	Normal	30.2333	No	Employed	More than one	No	0	0	0	0	0	0	0	0	0	0	0	0	0	0	0	0
		1	Outside South Africa	Black	Single	Incomplete Secondary	Employed full-time	Yes	12	No	55	1	No	Never	Yes	No	No			Non-SA	Not married		Secondary	10-15 yrs			LSIL	Abnormal	13.0333	No	Employed	One	No	0	0	0	0	0	0	0	0	0	0	0	0	0	0	0	0
40	503	1	Free State	Black	Single	Completed Secondary	Employed full-time	Yes	14	No	10	3	Yes	2 to 4 times a month	No	Yes	No	40		SA	Not married	350 and above	Secondary	10-15 yrs	40	503			32.2667	Yes	Employed			0	0	1	1	0	0	0	0	0	0	0	0	0	0	1	0
40	619	1	North West	Black	Single	Completed Secondary	Unemployed	Yes	18	No	900	25	Yes	Once a month or less	No	No	No	40		SA	Not married	350 and above	Secondary	16-20 yrs	40	619	Cytology		27.4	Yes	unemployed			0	0	0	0	0	0	0	0	0	0	0	0	0	0	0	0
161028	476	1	Gauteng	Black	Single	Graduate/Postgraduate	Employed full-time	Yes	16	No	200	2	No	2 to 4 times a month	No	No	No	161028		SA	Not married	350 and above	Tertiary	16-20 yrs	161028	476	Normal	Normal		Yes	Employed	More than one	No	0	0	0	0	0	0	0	0	0	0	0	0	0	0	0	0
63863	487	1	Kwazulu Natal	Black	Single	Incomplete Secondary	Employed full-time	Yes	17	No	7	2	No	2 to 4 times a month	No	No	No	63863		SA	Not married	350 and above	Secondary	16-20 yrs	63863	487	Normal	Normal		Yes	Employed	More than one	0	0	0	0	0	0	0	0	0	0	0	0	0	0	0	0	0
		1	Kwazulu Natal	Black	Married	Incomplete Secondary	Employed full-time	Yes	17	No	150	1	No	Never	No	No	No			SA	Currently Married		Secondary	16-20 yrs			ASCUS	Abnormal		No	Employed	One	No	0	0	0	0	0	0	0	0	0	0	0	0	0	0	0	0
33054	668	1	Kwazulu Natal	Black	Married	Incomplete Secondary	Employed part-time	Yes	19	No	90	2	No	Once a month or less	Yes	Yes	No		668	SA	Currently Married	350 and above	Secondary	16-20 yrs	33054	668	Normal	Normal		Yes	Employed	More than one	No	0	0	0	0	0	0	0	0	0	0	0	0	0	0	0	0
3663	136	1	Eastern Cape	Black	Single	Incomplete Secondary	Unemployed	Yes	15	No	5	1	No	Never	Yes	Yes	No	3663		SA	Not married	Less than 350	Secondary	10-15 yrs	3663	136			42.4667	No	unemployed	One	No	1	0	0	0	0	0	0	0	1	0	0	0	0	0	0	0
13201	355	1	Limpopo	Black	Single	Completed Secondary	Employed part-time	Yes	19	No	20	2	No	2 to 4 times a month	Yes	No	No	13201		SA	Not married	350 and above	Secondary	16-20 yrs	13201	355	LSIL	Abnormal		Yes	Employed	More than one	0	0	0	0	0	0	0	0	0	0	0	0	0	0	0	0	0
0	649	1	Kwazulu Natal	Black	Married	Completed Secondary	Self employed	Yes	18	No	999	1	No	Once a month or less	No	No	No	0		SA	Currently Married	350 and above	Secondary	16-20 yrs	0	649	Normal	Normal	46.6667	Yes	Employed	One	No	0	0	0	0	0	0	0	0	0	0	0	0	0	0	0	0
100	537	1	Outside South Africa	Black	Single	Incomplete Secondary	Employed full-time	Yes	18	No	6	1	No	Never	No	No	No	100		Non-SA	Not married	350 and above	Secondary	16-20 yrs	100	537	Normal	Normal		No	Employed	One	No
127788	436	1	Kwazulu Natal	Black	Divorced/Separated	Graduate/Postgraduate	Self employed	Yes	18	No	160	2	No	2 to 4 times a month	Yes	No	No		436	SA	Not married	350 and above	Tertiary	16-20 yrs	127788	436	ASCUS	Abnormal		Yes	Employed	More than one	No	0	0	0	0	0	0	0	0	0	0	0	0	0	0	0	0
3928	435	1	Kwazulu Natal	Black	Widowed	Primary	Employed full-time	Yes	23	No	4	1	Yes	Never	Yes	Yes	No	3928		SA	Not married	350 and above	Primary	>20 yrs	3928	435	Normal	Normal		No	Employed	One	No	0	0	0	0	0	0	0	0	0	0	0	0	0	0	0	0
208683	254	1	Outside South Africa	Black	Married	Primary	Employed full-time	Yes	20	No	4	1	No	Never	No	No	Yes	208683		Non-SA	Currently Married	Less than 350	Primary	16-20 yrs	208683	254	Normal	Normal		No	Employed	One	No	0	0	0	0	0	0	0	0	0	0	0	0	0	0	0	0
282	553	1	Gauteng	Coloured	Divorced/Separated	Completed Secondary	Employed full-time	Yes	17	No	10	1	No	Never	Yes	Yes	No		553	SA	Not married	350 and above	Secondary	16-20 yrs	282	553	ASCUS	Abnormal		No	Employed			1	0	0	0	0	0	0	0	0	0	0	0	0	0	0	0
5655	609	1	Outside South Africa	Black	Married	Primary	Employed part-time	Yes	16	No	20	1	No	Never	No	No	No		609	Non-SA	Currently Married	350 and above	Primary	16-20 yrs	5655	609	Normal	Normal		No	Employed	One	0	0	0	0	0	0	0	0	0	0	0	0	0	0	0	0	0
72447	316	1	Kwazulu Natal	Black	Single	Completed Secondary	Employed part-time	Yes	16	No	35	1	No	2 to 4 times a month	Yes	No	No		316	SA	Not married	Less than 350	Secondary	16-20 yrs	72447	316	Normal	Normal		Yes	Employed	One	0
75557	471	1	Gauteng	Black	Married	Primary	Employed full-time	Yes	15	No	10	1	No	Never	No	Yes	No		471	SA	Currently Married	350 and above	Primary	10-15 yrs	75557	471	Normal	Normal		No	Employed	One	No
36461	407	1	Outside South Africa	Black	Married	Incomplete Secondary	Employed part-time	Yes	18	No	10	1	No	2 to 4 times a month	Yes	No	No		407	Non-SA	Currently Married	350 and above	Secondary	16-20 yrs	36461	407	Normal	Normal		Yes	Employed	One	0	0	0	0	0	0	0	0	0	0	0	0	0	0	0	0	0
18871	344	1	Kwazulu Natal	Black	Single	Incomplete Secondary	Employed part-time	Yes	18	No	100	2	No	Once a month or less	Yes	No	No		344	SA	Not married	Less than 350	Secondary	16-20 yrs	18871	344	Normal	Normal		Yes	Employed	More than one	No	0	0	0	0	0	0	0	0	0	0	0	0	0	0	0	0
163300	290	1	Kwazulu Natal	Black	Single	Completed Secondary	Employed part-time	Yes	15	No	100	1	No	Never	No	No	No		290	SA	Not married	Less than 350	Secondary	10-15 yrs	163300	290	Normal	Normal		No	Employed	One	No	0	0	0	0	0	0	0	0	0	0	0	1	0	0	1	0
1067	507	1	Kwazulu Natal	Black	Single	Completed Secondary	Unemployed	Yes	14	No	15	2	No	Never	No	No	No		507	SA	Not married	350 and above	Secondary	10-15 yrs	1067	507	Normal	Normal		No	unemployed
40	299	1	Outside South Africa	Black	Single	Incomplete Secondary	Employed full-time	Yes	15	No	25	1	No	Never	No	No	No		299	Non-SA	Not married	Less than 350	Secondary	10-15 yrs	40	299	Cytology			No	Employed	One	No	0	0	0	0	0	0	0	0	0	0	0	0	0	0	0	0
144964	436	1	Kwazulu Natal	Black	Single	Completed Secondary	Employed part-time	Yes	16	No	30	1	No	2 to 4 times a month	No	No	Yes		436	SA	Not married	350 and above	Secondary	16-20 yrs	144964	436	Normal	Normal		Yes	Employed	One	No	0	0	1	1	0	0	0	0	0	0	0	0	0	0	0	0
33776	524	1	Outside South Africa	Black	Married	Graduate/Postgraduate	Employed full-time	Yes	21	No	3	2	No	Never	No	No	No		524	Non-SA	Currently Married	350 and above	Tertiary	>20 yrs	33776	524	Normal	Normal		No	Employed	More than one	0	0	0	0	0	0	0	0	0	0	0	0	0	0	0	0	0
137737	373	1	Limpopo	Black	Single	Graduate/Postgraduate	Employed full-time	Yes	15	No	12	1	No	Never	No	No	No		373	SA	Not married	350 and above	Tertiary	10-15 yrs	137737	373	Normal	Normal		No	Employed	One	No	0	0	0	0	0	0	0	0	0	0	0	0	0	0	0	0
		1	Eastern Cape	Black	Single	Incomplete Secondary	Employed part-time	Yes	15	No	100	1	No	2 to 4 times a month	No	Yes	No			SA	Not married		Secondary	10-15 yrs			ASCUS	Abnormal		Yes	Employed	One	No
40719	611	1	Kwazulu Natal	Black	Married	Primary	Employed full-time	Yes	20	No	13	3	No	2 to 4 times a month	Yes	No	No		611	SA	Currently Married	350 and above	Primary	16-20 yrs	40719	611				Yes	Employed	More than one	No	1	0	0	0	0	0	0	0	0	0	0	0	0	0	0	0
1052	781	1	Outside South Africa	Black	Single	Incomplete Secondary	Employed part-time	Yes	17	No	50	1	No	Never	No	No	No		781	Non-SA	Not married	350 and above	Secondary	16-20 yrs	1052	781	Normal	Normal		No	Employed	One	No	0	0	0	0	0	0	0	0	0	0	0	0	0	0	0	0
6591	552	1	Mpumalanga	Black	Single	Completed Secondary	Unemployed	Yes	19	No	28	1	No	Never	No	No	No		552	SA	Not married	350 and above	Secondary	16-20 yrs	6591	552	ASCUS	Abnormal		No	unemployed	One	No	0	0	0	0	0	0	0	0	0	0	0	0	0	0	0	0
8001	1317	1	Gauteng	Black	Single	Completed Secondary	Employed full-time	Yes	14	No	23	1	No	2 to 4 times a month	Yes	No	No	8001		SA	Not married	350 and above	Secondary	10-15 yrs	8001	1317	Normal	Normal		Yes	Employed	One	No	0	0	0	0	0	0	0	0	0	0	0	0	0	0	0	0
48	936	1	Kwazulu Natal	Black	Married	Completed Secondary	Employed full-time	Yes	16	No	8	1	No	Once a month or less	No	No	No		936	SA	Currently Married	350 and above	Secondary	16-20 yrs	48	936	ASCUS	Abnormal		Yes	Employed	One	No	0	0	0	0	0	0	0	0	0	0	0	0	0	0	0	0
-99	398	1	Gauteng	Black	Single	Graduate/Postgraduate	Employed part-time	Yes	19	No	15	1	No	2 to 3 times a week	Yes	No	No	-99		SA	Not married	350 and above	Tertiary	16-20 yrs	-99	398				Yes	Employed	One	No	0	0	0	0	0	0	0	0	0	0	0	0	0	0	0	0
897	379	1	Outside South Africa	Black	Single	Incomplete Secondary	Employed full-time	Yes	16	No	3	1	No	Never	No	No	No		379	Non-SA	Not married	350 and above	Secondary	16-20 yrs	897	379	LSIL	Abnormal		No	Employed	One	0	0	0	0	0	0	0	0	0	0	0	0	0	0	0	0	0
		1	Kwazulu Natal	Black	Single	Completed Secondary	Employed full-time	Yes	19	No	9	1	No	Once a month or less	Yes	No	No			SA	Not married		Secondary	16-20 yrs			Normal	Normal		Yes	Employed	One	No	0	0	0	0	0	0	0	0	0	0	0	0	0	0	0	0
40	1304	1	Kwazulu Natal	Black	Single	Completed Secondary	Employed full-time	Yes	17	No	4	1	No	2 to 4 times a month	No	No	No		1304	SA	Not married	350 and above	Secondary	16-20 yrs	40	1304				Yes	Employed			0	0	0	0	0	0	0	0	0	0	0	0	0	0	0	0
613	565	1	Kwazulu Natal	Black	Single	Incomplete Secondary	Unemployed	Yes	18	No	4	2	No	Once a month or less	No	No	Yes		565	SA	Not married	350 and above	Secondary	16-20 yrs	613	565				Yes	unemployed	More than one	No
21092	500	1	Outside South Africa	Black	Divorced/Separated	Incomplete Secondary	Employed part-time	Yes	17	No	60	1	No	Never	No	No	No		500	Non-SA	Not married	350 and above	Secondary	16-20 yrs	21092	500	ASCUS	Abnormal		No	Employed	One	No	0	0	0	0	0	0	0	0	0	0	0	0	0	0	0	0
0	607	1	Kwazulu Natal	Black	Single	Primary	Unemployed	Yes	11	No	10	1	No	Never	Yes	No	Yes	0		SA	Not married	350 and above	Primary	10-15 yrs	0	607	Cytology		50.7333	No	unemployed	One	No	0	0	0	0	0	0	0	0	0	0	0	0	0	0	0	0
0	509	1	Outside South Africa	Black	Married	Primary	Employed full-time	Yes	30	No	10	1	No	Once a month or less	No	No	No	0		Non-SA	Currently Married	350 and above	Primary	>20 yrs	0	509	Normal	Normal	109.6	Yes	Employed	One	No	0	0	0	0	0	0	0	0	0	0	0	0	0	0	0	0
74890	298	1	Kwazulu Natal	Black	Single	Completed Secondary	Employed full-time	Yes	21	No	10	1	No	2 to 4 times a month	No	No	No		298	SA	Not married	Less than 350	Secondary	>20 yrs	74890	298	Normal	Normal		Yes	Employed	One	No
1477	742	1	Kwazulu Natal	Black	Single	Incomplete Secondary	Employed full-time	Yes	15	Yes	12	1	No	Once a month or less	No	No	No	1477		SA	Not married	350 and above	Secondary	10-15 yrs	1477	742	Normal	Normal		Yes	Employed	One	No	0	0	0	0	0	0	0	0	0	0	0	0	0	0	0	0
14118	350	1	Outside South Africa	Black	Single	Incomplete Secondary	Employed part-time	Yes	15	No	10	1	No	2 to 4 times a month	No	No	Yes			Non-SA	Not married	350 and above	Secondary	10-15 yrs	14118	350	Normal	Normal		Yes	Employed	One	No	0	0	0	0	0	0	0	0	0	0	0	0	0	0	0	0
		1	Outside South Africa	Black	Married	Incomplete Secondary	Employed part-time	Yes	21	No	10	1	No	2 to 3 times a week	Yes	No	No			Non-SA	Currently Married		Secondary	>20 yrs			ASCUS	Abnormal		Yes	Employed	One	No	0	0	0	0	0	0	0	0	0	0	0	0	0	0	0	0
		1	Gauteng	Black	Married	Incomplete Secondary	Employed full-time	Yes	25	No	3	1	No	2 to 4 times a month	No	No	No			SA	Currently Married		Secondary	>20 yrs			ASCUS	Abnormal		Yes	Employed	One	0	0	0	0	0	0	0	0	0	0	0	0	0	0	0	0	0
180439	402	1	Outside South Africa	Black	Single	No Schooling	Employed part-time	Yes	18	No	100	1	No	2 to 4 times a month	No	No	No		402	Non-SA	Not married	350 and above	None	16-20 yrs	180439	402	Normal	Normal		Yes	Employed	One	0	0	0	0	0	0	0	0	0	0	0	0	0	0	0	0	0
		1	Kwazulu Natal	Black	Single	Incomplete Secondary	Employed full-time	Yes	19	No	4	1	No	Never	No	No	No			SA	Not married		Secondary	16-20 yrs			Normal	Normal		No	Employed	One	0
22696	724	1	Mpumalanga	Black	Single	Primary	Employed full-time	Yes	20	No	50	1	No	2 to 4 times a month	Yes	No	Yes			SA	Not married	350 and above	Primary	16-20 yrs	22696	724				Yes	Employed	One	No	0	0	0	0	0	0	0	0	0	0	0	0	0	0	0	0
28211	482	1	North West	Black	Married	Primary	Employed full-time	Yes	15	No	30	1	No	2 to 4 times a month	Yes	No	No	28211	482	SA	Currently Married	350 and above	Primary	10-15 yrs	28211	482	LSIL	Abnormal		Yes	Employed	One	No	0	0	0	0	0	0	0	0	0	0	0	0	0	0	0	0
23727	502	1	Outside South Africa	Black	Divorced/Separated	Incomplete Secondary	Employed part-time	Yes	21	No	6	1	No	Once a month or less	Yes	No	No	23727		Non-SA	Not married	350 and above	Secondary	>20 yrs	23727	502	ASCUS	Abnormal		Yes	Employed	One	No	0	0	0	0	0	0	0	0	0	0	0	0	0	0	0	0
9189	742	1	Outside South Africa	Black	Single	Primary	Employed full-time	Yes	22	No	3	1	No	2 to 4 times a month	Yes	Yes	No		742	Non-SA	Not married	350 and above	Primary	>20 yrs	9189	742				Yes	Employed	One	0	0	0	0	0	0	0	0	0	0	0	0	0	0	0	0	0
5392	549	1	Gauteng	Black	Single	Incomplete Secondary	Employed full-time	Yes	21	No	5	1	No	Never	No	Yes	No		549	SA	Not married	350 and above	Secondary	>20 yrs	5392	549	Cytology			No	Employed	One	No	0	0	0	0	0	0	0	0	0	0	0	0	0	0	0	0
14512	573	1	Outside South Africa	Black	Divorced/Separated	Incomplete Secondary	Employed part-time	Yes	17	No	3	1	No	Never	No	Yes	No		573	Non-SA	Not married	350 and above	Secondary	16-20 yrs	14512	573	Normal	Normal		No	Employed	One	No	0	0	0	0	0	0	0	0	0	0	0	0	0	0	0	0
1768	1271	1	Mpumalanga	Black	Married	Completed Secondary	Employed full-time	Yes	17	No	7	1	No	Never	No	No	No		1271	SA	Currently Married	350 and above	Secondary	16-20 yrs	1768	1271	Normal	Normal		No	Employed	One	No
40	87	1	Outside South Africa	Black	Divorced/Separated	Graduate/Postgraduate	Employed part-time	Yes	19	No	20	1	No	Once a month or less	No	No	No	40		Non-SA	Not married	Less than 350	Tertiary	16-20 yrs	40	87	LSIL	Abnormal	9.56667	Yes	Employed	One	No	0	0	1	1	0	0	0	0	0	0	0	0	0	0	0	0
622	844	1	Kwazulu Natal	Black	Single	Incomplete Secondary	Unemployed	Yes	17	No	8	1	No	2 to 4 times a month	Yes	Yes	No		844	SA	Not married	350 and above	Secondary	16-20 yrs	622	844	Normal	Normal		Yes	unemployed	One	No
16746	686	1	Kwazulu Natal	Black	Single	Completed Secondary	Employed part-time	Yes	20	No	300	3	No	Once a month or less	Yes	No	No	16746		SA	Not married	350 and above	Secondary	16-20 yrs	16746	686				Yes	Employed			0	0	0	0	0	0	0	0	0	0	0	0	0	0	0	0
8001	590	1	Outside South Africa	Black	Married	Incomplete Secondary	Employed full-time	Yes	16	No	20	2	No	2 to 4 times a month	No	No	No		590	Non-SA	Currently Married	350 and above	Secondary	16-20 yrs	8001	590				Yes	Employed	More than one	No	0	0	0	0	0	0	0	0	0	0	0	0	0	0	0	0
83205	499	1	Kwazulu Natal	Black	Single	Incomplete Secondary	Employed part-time	Yes	16	No	999	2	No	Once a month or less	Yes	No	Yes		499	SA	Not married	350 and above	Secondary	16-20 yrs	83205	499	LSIL	Abnormal		Yes	Employed	More than one	No	0	0	1	1	0	0	0	0	0	0	0	0	0	0	0	0
13730	462	1	Outside South Africa	Black	Single	Primary	Unemployed	Yes	16	No	20	3	No	2 to 4 times a month	No	Yes	No		462	Non-SA	Not married	350 and above	Primary	16-20 yrs	13730	462	Normal	Normal		Yes	unemployed	More than one	No	0	0	0	0	0	0	0	0	0	0	0	0	0	0	0	0
45176	319	1	Outside South Africa	Black	Married	Primary	Employed part-time	Yes	17	No	100	1	No	Never	No	No	No			Non-SA	Currently Married	Less than 350	Primary	16-20 yrs	45176	319	Normal	Normal		No	Employed	One	0	0	0	0	0	0	0	0	0	0	0	0	0	0	0	0	0
6963	663	1	Outside South Africa	Black	Married	Primary	Employed part-time	Yes	20	No	15	1	No	2 to 3 times a week	Yes	No	No		663	Non-SA	Currently Married	350 and above	Primary	16-20 yrs	6963	663	Normal	Normal		Yes	Employed	One	No	0	0	0	0	0	0	0	0	0	0	0	0	0	0	0	0
236212	216	1	Gauteng	Black	Single	Incomplete Secondary	Unemployed	Yes	15	No	50	4	No	2 to 4 times a month	Yes	No	No			SA	Not married	Less than 350	Secondary	10-15 yrs	236212	216	Normal	Normal		Yes	unemployed	More than one	0	0	0	0	0	0	0	0	0	0	0	0	0	0	0	0	0
0	110	1	Kwazulu Natal	Black	Single	Incomplete Secondary	Employed part-time	Yes	16	No	50	1	No	Never	No	No	Yes			SA	Not married	Less than 350	Secondary	16-20 yrs	0	110	LSIL	Abnormal	8	No	Employed	One	No	1	0	0	0	0	0	0	0	0	0	0	0	0	0	1	0
33061	306	1	Gauteng	Black	Married	Incomplete Secondary	Self employed	Yes	29	No	3	1	No	Never	No	No	No			SA	Currently Married	Less than 350	Secondary	>20 yrs	33061	306	ASCUS	Abnormal		No	Employed	One	No	0	0	0	0	1	0	0	0	0	0	0	0	0	0	0	0
25702	418	1	Kwazulu Natal	Black	Single	Completed Secondary	Employed full-time	Yes	15	No	120	1	No	2 to 4 times a month	No	No	No		418	SA	Not married	350 and above	Secondary	10-15 yrs	25702	418	Normal	Normal		Yes	Employed	One	No	0	0	0	0	0	0	0	0	0	0	0	0	0	0	0	0
0	195	1	Limpopo	Black	Divorced/Separated	Completed Secondary	Employed full-time	Yes	17	No	40	2	No	Never	No	Yes	No			SA	Not married	Less than 350	Secondary	16-20 yrs	0	195	Normal	Normal	45.8	No	Employed	More than one	No	0	0	0	0	0	0	0	0	0	0	0	0	0	0	1	1
-99	585	1	Gauteng	Black	Widowed	Primary	Unemployed	Yes	22	No	7	1	No	Never	No	No	No	-99		SA	Not married	350 and above	Primary	>20 yrs	-99	585	Normal	Normal	8.43333	No	unemployed	One	No	0	0	0	0	0	0	0	0	0	0	0	0	0	0	0	0
171891	481	1	Gauteng	Black	Married	Completed Secondary	Employed full-time	Yes	14	No	500	1	No	2 to 4 times a month	No	Yes	No			SA	Currently Married	350 and above	Secondary	10-15 yrs	171891	481				Yes	Employed	One	No	0	0	0	0	0	0	0	0	0	0	0	0	0	0	0	0
18069	547	1	Mpumalanga	Black	Single	Primary	Employed part-time	Yes	13	No	8	1	No	Never	Yes	No	No		547	SA	Not married	350 and above	Primary	10-15 yrs	18069	547				No	Employed	One	No	0	0	1	1	0	0	0	0	0	0	0	0	1	0	0	0
446	622	1	Kwazulu Natal	Black	Married	Completed Secondary	Employed part-time	Yes	16	No	5	1	No	2 to 4 times a month	No	No	No			SA	Currently Married	350 and above	Secondary	16-20 yrs	446	622	Normal	Normal		Yes	Employed	One	0	0	0	0	0	0	0	0	0	0	0	0	0	0	0	0	0
559	443	1	Outside South Africa	Black	Married	Primary	Employed part-time	Yes	16	No	15	2	No	Once a month or less	Yes	No	No			Non-SA	Currently Married	350 and above	Primary	16-20 yrs	559	443	Normal	Normal		Yes	Employed	More than one	No
40	622	1	Gauteng	Black	Widowed	Primary	Employed full-time	Yes	19	No	17	2	No	Once a month or less	No	No	No			SA	Not married	350 and above	Primary	16-20 yrs	40	622	Normal	Normal	96	Yes	Employed	More than one	No	0	0	0	0	0	0	0	0	0	0	0	0	0	1	1	0
0	412	1	Gauteng	Black	Widowed	Primary	Unemployed	Yes	19	No	30	1	No	Never	Yes	No	No			SA	Not married	350 and above	Primary	16-20 yrs	0	412	Normal	Normal	37.1667	No	unemployed	One	No	0	0	0	0	0	0	0	0	0	0	0	0	0	0	0	0
0	295	1	Kwazulu Natal	Black	Divorced/Separated	No Schooling	Employed full-time	Yes	17	No	40	1	No	Once a month or less	Yes	No	Yes			SA	Not married	Less than 350	None	16-20 yrs	0	295	Normal	Normal	11.8	Yes	Employed	One	No	0	0	1	1	0	0	0	0	0	0	0	0	0	0	0	0
137	242	1	Gauteng	Black	Single	Graduate/Postgraduate	Self employed	Yes	18	No	100	5	No	Once a month or less	Yes	No	Yes			SA	Not married	Less than 350	Tertiary	16-20 yrs	137	242	ASCUS	Abnormal	14.6	Yes	Employed	More than one	0
0	346	1	Free State	Black	Single	No Schooling	Unemployed	Yes	17	No	35	1	No	Never	No	No	No			SA	Not married	Less than 350	None	16-20 yrs	0	346	LSIL	Abnormal	73.4667	No	unemployed	One	No	0	0	0	0	0	0	0	0	0	0	0	0	0	0	0	0
93576	299	1	Kwazulu Natal	Black	Single	Completed Secondary	Employed full-time	Yes	22	No	6	1	No	Never	No	No	No			SA	Not married	Less than 350	Secondary	>20 yrs	93576	299	LSIL	Abnormal		No	Employed	One	No	0	0	0	0	0	0	0	0	0	0	0	0	0	0	0	0
505141	298	1	Free State	Black	Single	Incomplete Secondary	Unemployed	Yes	17	No	800	1	No	2 to 4 times a month	No	No	No			SA	Not married	Less than 350	Secondary	16-20 yrs	505141	298	LSIL	Abnormal	76.6667	Yes	unemployed	One	No	0	0	0	0	0	0	0	0	0	0	0	0	0	0	0	0
138747	767	1	Gauteng	Black	Married	Graduate/Postgraduate	Employed full-time	Yes	19	No	12	1	No	Never	No	No	No			SA	Currently Married	350 and above	Tertiary	16-20 yrs	138747	767	ASCUS	Abnormal		No	Employed	One	No	0	0	0	0	0	0	0	0	0	0	0	0	0	0	0	0
0	595	1	Outside South Africa	Black	Divorced/Separated	Incomplete Secondary	Employed full-time	Yes	16	No	25	1	No	Never	No	No	No			Non-SA	Not married	350 and above	Secondary	16-20 yrs	0	595	ASCUS	Abnormal	31	No	Employed	One	No	0	0	0	0	0	0	0	0	0	0	0	0	0	0	0	0
0	543	1	Outside South Africa	Black	Married	Incomplete Secondary	Employed full-time	Yes	19	No	7	1	No	Never	No	No	No			Non-SA	Currently Married	350 and above	Secondary	16-20 yrs	0	543	Cytology		125.433	No	Employed	One	No	0	0	0	0	0	0	0	0	0	0	0	0	0	0	0	0
0	472	1	Gauteng	Black	Single	Incomplete Secondary	Unemployed	Yes	15	No	999	1	No	Once a month or less	Yes	Yes	No			SA	Not married	350 and above	Secondary	10-15 yrs	0	472	LSIL	Abnormal	23.1333	Yes	unemployed	One	No	0	0	0	0	0	0	0	0	0	0	0	0	0	0	0	0
0	491	1	Outside South Africa	Black	Married	Incomplete Secondary	Employed full-time	Yes	20	No	10	1	No	Once a month or less	No	No	No			Non-SA	Currently Married	350 and above	Secondary	16-20 yrs	0	491			31.2667	Yes	Employed	One	No	0	0	0	0	0	0	0	0	0	0	0	0	0	0	0	0
40	342	1	Gauteng	Black	Single	Incomplete Secondary	Employed full-time	Yes	17	No	15	1	No	Once a month or less	No	No	No			SA	Not married	Less than 350	Secondary	16-20 yrs	40	342			95	Yes	Employed	One	No	0	0	1	1	0	0	0	0	0	0	0	0	0	0	0	0
0	197	1	Kwazulu Natal	Black	Single	Incomplete Secondary	Unemployed	Yes	16	No	300	13	No	Once a month or less	Yes	No	No			SA	Not married	Less than 350	Secondary	16-20 yrs	0	197			17.9	Yes	unemployed	More than one	No	0	0	0	0	0	0	0	0	0	0	0	0	0	0	0	1
0	368	1	Kwazulu Natal	Black	Single	Incomplete Secondary	Employed part-time	Yes	18	No	16	1	No	Never	Yes	Yes	No			SA	Not married	350 and above	Secondary	16-20 yrs	0	368	LSIL	Abnormal	48.4	No	Employed	One	No	0	0	0	0	1	0	0	0	0	0	0	0	0	0	0	0
0	335	1	Outside South Africa	Black	Married	Primary	Unemployed	Yes	15	No	150	1	No	Never	No	No	No			Non-SA	Currently Married	Less than 350	Primary	10-15 yrs	0	335	Normal	Normal	77.8333	No	unemployed	One	No
18704	475	1	Gauteng	Black	Single	Incomplete Secondary	Employed part-time	Yes	18	No	10	2	No	2 to 4 times a month	Yes	No	Yes	18704		SA	Not married	350 and above	Secondary	16-20 yrs	18704	475	LSIL	Abnormal		Yes	Employed	More than one	No	0	0	0	0	0	0	0	0	0	0	0	0	0	0	0	0
-99	545	1	Kwazulu Natal	Black	Single	Completed Secondary	Employed part-time	Yes	18	No	2	1	No	Never	No	No	No	-99		SA	Not married	350 and above	Secondary	16-20 yrs	-99	545			28.2333	No	Employed	One	No	0	0	0	0	0	0	0	0	0	0	0	0	0	0	0	0
40	261	1	North West	Black	Widowed	Primary	Employed full-time	Yes	18	No	7	1	No	Once a month or less	Yes	No	Yes	40		SA	Not married	Less than 350	Primary	16-20 yrs	40	261			87.1			One	No	0	0	0	0	0	0	0	0	0	0	0	0	0	0	0	0
45	534	1	Outside South Africa	Black	Single	Incomplete Secondary	Unemployed	Yes	15	No	24	1	No	Once a month or less	No	No	No	45		Non-SA	Not married	350 and above	Secondary	10-15 yrs	45	534	ASCUS	Abnormal	57.6667	Yes	unemployed	One	0	0	0	0	0	0	0	0	0	0	0	0	0	0	0	0	0
		1	Outside South Africa	Black	Single	Incomplete Secondary	Employed full-time	Yes	17	No	30	2	No	Never	No	No	No			Non-SA	Not married		Secondary	16-20 yrs			LSIL	Abnormal	16.1	No	Employed	More than one	No
40	493	1	Limpopo	Black	Single	Graduate/Postgraduate	Employed full-time	Yes	18	No	7	1	Yes	Never	No	Yes	No	40		SA	Not married	350 and above	Tertiary	16-20 yrs	40	493	Normal	Normal	33.5667	No	Employed			1	1	0	0	0	0	0	0	0	0	0	0	0	0	0	0
2470	902	1	Outside South Africa	Black	Single	Incomplete Secondary	Employed full-time	Yes	18	No	4	1	No	Once a month or less	No	No	No	2470		Non-SA	Not married	350 and above	Secondary	16-20 yrs	2470	902				Yes	Employed	One	0	0	0	0	0	0	0	0	0	0	0	0	0	0	0	0	0
-99	442	1	Outside South Africa	Black	Single	Incomplete Secondary	Employed full-time	Yes	21	No	2	1	No	Never	No	No	No	-99		Non-SA	Not married	350 and above	Secondary	>20 yrs	-99	442			35.2667	No	Employed	One	No
53467	455	1	Kwazulu Natal	Black	Single	Completed Secondary	Unemployed	Yes	17	No	500	2	No	Once a month or less	Yes	No	No		455	SA	Not married	350 and above	Secondary	16-20 yrs	53467	455				Yes	unemployed	More than one	0
-99	574	1	Outside South Africa	Black	Widowed	Incomplete Secondary	Employed full-time	Yes	21	No	500	1	No	Once a month or less	No	No	No	-99		Non-SA	Not married	350 and above	Secondary	>20 yrs	-99	574			125.733	Yes	Employed	One	No
-99	375	1	Gauteng	Black	Single	Incomplete Secondary	Employed full-time	Yes	17	No	4	1	No	Never	No	No	No	-99		SA	Not married	350 and above	Secondary	16-20 yrs	-99	375			20.3667	No	Employed	One	No	0	0	0	0	0	0	0	0	0	0	0	0	0	0	0	0
82	319	1	Kwazulu Natal	Black	Single	Completed Secondary	Self employed	Yes	15	No	30	2	Yes	2 to 4 times a month	Yes	No	No	82		SA	Not married	Less than 350	Secondary	10-15 yrs	82	319			86.7	Yes	Employed	More than one	No
-99	358	1	Outside South Africa	Black	Married	Primary	Unemployed	Yes	18	No	6	1	No	Never	No	No	No	-99		Non-SA	Currently Married	350 and above	Primary	16-20 yrs	-99	358	Normal	Normal	49.7	No	unemployed	One	No	0	0	0	0	0	0	0	0	0	0	0	0	0	0	0	0
40	283	1	Eastern Cape	Black	Married	Completed Secondary	Employed full-time	Yes	16	No	17	1	No	Once a month or less	No	No	No	40		SA	Currently Married	Less than 350	Secondary	16-20 yrs	40	283	ASCUS	Abnormal	16.6	Yes	Employed	One	No	0	0	0	0	0	0	0	0	0	0	0	0	0	0	0	0
-99	232	1	Gauteng	Black	Single	Completed Secondary	Unemployed	Yes	15	No	7	1	No	Never	No	No	No	-99		SA	Not married	Less than 350	Secondary	10-15 yrs	-99	232			17.2667	No	unemployed	One	No	0	0	0	0	0	0	0	0	0	0	0	0	0	0	1	0
40	242	1	Kwazulu Natal	Black	Single	Primary	Unemployed	Yes	26	No	6	1	No	2 to 4 times a month	No	No	Yes	40		SA	Not married	Less than 350	Primary	>20 yrs	40	242	LSIL	Abnormal	10.1667	Yes	unemployed	One	No	0	0	0	0	0	0	0	0	1	0	0	0	0	0	0	0
0	123	1	Kwazulu Natal	Black	Single	Completed Secondary	Self employed	Yes	18	No	20	2	No	Once a month or less	Yes	Yes	No			SA	Not married	Less than 350	Secondary	16-20 yrs	0	123			75.4	Yes	Employed	More than one	No	0	0	0	0	0	0	0	0	0	0	0	0	0	0	0	0
-99	300	1	Eastern Cape	Black	Single	Primary	Unemployed	Yes	25	No	3	1	No	Never	Yes	Yes	No	-99		SA	Not married	Less than 350	Primary	>20 yrs	-99	300			42.6667	No	unemployed	One	No	0	0	0	0	0	0	0	0	0	0	0	0	0	0	0	0
-99	517	1	Gauteng	Black	Married	Incomplete Secondary	Unemployed	Yes	16	No	30	1	No	Never	Yes	No	No	-99		SA	Currently Married	350 and above	Secondary	16-20 yrs	-99	517	Normal	Normal	46.7667	No	unemployed	One	No
0	387	1	Outside South Africa	Black	Single	Primary	Self employed	Yes	16	No	300	3	No	2 to 3 times a week	Yes	No	No			Non-SA	Not married	350 and above	Primary	16-20 yrs	0	387	LSIL	Abnormal	23.5667	Yes	Employed	More than one	No
0	264	1	Outside South Africa	Black	Married	Incomplete Secondary	Employed full-time	Yes	18	No	999	1	No	Never	No	No	No	0		Non-SA	Currently Married	Less than 350	Secondary	16-20 yrs	0	264	ASCUS	Abnormal	72.3	No	Employed	One	No	0	0	0	0	0	0	0	0	0	0	0	0	0	0	0	0
10535	107	1	Kwazulu Natal	Black	Single	Completed Secondary	Employed part-time	Yes	16	No	50	1	No	2 to 4 times a month	Yes	No	No	10535		SA	Not married	Less than 350	Secondary	16-20 yrs	10535	107				Yes	Employed	One	No	0	0	0	0	0	0	0	0	0	0	0	0	0	0	0	0
55	650	1	North West	Black	Single	Graduate/Postgraduate	Unemployed	Yes	19	No	3	1	No	Once a month or less	No	No	No	55		SA	Not married	350 and above	Tertiary	16-20 yrs	55	650			46.9333	Yes	unemployed	One	No	0	0	0	0	0	0	0	0	0	0	0	0	0	0	0	0
0	327	1	Free State	Black	Single	Incomplete Secondary	Employed part-time	Yes	17	No	18	1	No	2 to 4 times a month	Yes	No	Yes	0		SA	Not married	Less than 350	Secondary	16-20 yrs	0	327	LSIL	Abnormal	15.5	Yes	Employed	One	No
40	584	1	Gauteng	Black	Single	Primary	Self employed	Yes	17	No	20	1	No	Once a month or less	Yes	No	No			SA	Not married	350 and above	Primary	16-20 yrs	40	584	LSIL	Abnormal	9.6	Yes	Employed			0	0	0	0	0	0	0	0	0	0	0	0	0	0	0	0
98	547	1	Kwazulu Natal	Black	Single	Completed Secondary	Employed full-time	Yes	23	No	2	2	No	Once a month or less	No	No	No		547	SA	Not married	350 and above	Secondary	>20 yrs	98	547	Normal	Normal		Yes	Employed	More than one	0
1139	377	1	Kwazulu Natal	Black	Single	Completed Secondary	Employed full-time	Yes	22	No	3	1	No	Never	No	Yes	No	1139		SA	Not married	350 and above	Secondary	>20 yrs	1139	377	LSIL	Abnormal	6.5	No	Employed	One	No
		1	Kwazulu Natal	Black	Single	Primary	Employed part-time	Yes	17	No	50	3	No	Once a month or less	No	No	No			SA	Not married		Primary	16-20 yrs			Normal	Normal		Yes	Employed	More than one	No	0	0	0	0	0	0	0	0	0	0	0	0	0	0	0	0
0	817	1	Gauteng	Black	Single	Graduate/Postgraduate	Self employed	Yes	16	No	8	2	No	Once a month or less	No	Yes	No	0		SA	Not married	350 and above	Tertiary	16-20 yrs	0	817	LSIL	Abnormal	14.8	Yes	Employed	More than one	No	0	0	1	1	0	0	0	0	0	0	0	0	0	0	0	0
40	296	1	Gauteng	Black	Single	Primary	Self employed	Yes	23	No	17	3	No	Never	Yes	No	No	40		SA	Not married	Less than 350	Primary	>20 yrs	40	296	LSIL	Abnormal	86.8	No	Employed	More than one	No	0	0	0	0	0	0	0	0	0	0	0	0	0	0	0	0
		1	Outside South Africa	Black	Married	Completed Secondary	Employed full-time	Yes	17	No	4	1	No	Never	No	No	No			Non-SA	Currently Married		Secondary	16-20 yrs			ASCUS	Abnormal		No	Employed	One	No	0	0	0	0	0	0	0	0	0	0	0	0	0	0	0	0
11207	525	1	Outside South Africa	Black	Single	Completed Secondary	Employed full-time	Yes	21	No	5	1	No	Never	No	No	No		525	Non-SA	Not married	350 and above	Secondary	>20 yrs	11207	525	Normal	Normal		No	Employed	One	No	0	0	0	0	0	0	0	0	0	0	0	0	0	0	0	0
28314	246	1	Gauteng	Black	Divorced/Separated	Primary	Unemployed	Yes	21	No	4	1	No	Never	No	No	No	28314		SA	Not married	Less than 350	Primary	>20 yrs	28314	246			38.2333	No	unemployed	One	No	0	0	0	0	0	0	0	0	0	0	0	0	0	0	0	0
0	546	1	Outside South Africa	Black	Divorced/Separated	Graduate/Postgraduate	Self employed	Yes	27	No	50	1	No	Never	No	Yes	No	0		Non-SA	Not married	350 and above	Tertiary	>20 yrs	0	546			49.4	No	Employed	One	0	0	0	0	0	0	0	0	0	0	0	0	0	0	0	0	0
-99	806	1	Kwazulu Natal	Black	Single	Graduate/Postgraduate	Unemployed	Yes	19	No	10	1	No	Never	No	Yes	No	-99		SA	Not married	350 and above	Tertiary	16-20 yrs	-99	806	LSIL	Abnormal	9.7	No	unemployed	One	No	0	0	0	0	0	0	0	0	0	0	0	0	0	0	0	1
		1	Outside South Africa	Black	Married	Completed Secondary	Unemployed	Yes	20	No	15	1	No	Never	No	No	No			Non-SA	Currently Married		Secondary	16-20 yrs			Normal	Normal		No	unemployed	One	0	0	0	0	0	0	0	0	0	0	0	0	0	0	0	0	0
222079	407	1	North West	Black	Married	Primary	Employed part-time	Yes	16	No	30	1	No	2 to 4 times a month	No	Yes	No			SA	Currently Married	350 and above	Primary	16-20 yrs	222079	407	Normal	Normal		Yes	Employed	One	No	0	0	0	0	0	0	0	0	0	0	0	0	0	0	0	0
		1	Mpumalanga	Black	Single	Incomplete Secondary	Employed full-time	Yes	19	No	10	1	No	Never	No	No	No			SA	Not married		Secondary	16-20 yrs			Normal	Normal		No	Employed	One	No	0	0	0	0	0	0	0	0	0	0	0	0	0	0	0	0
0	841	1	Outside South Africa	Black	Married	Completed Secondary	Unemployed	Yes	22	No	10	1	No	Never	No	No	No			Non-SA	Currently Married	350 and above	Secondary	>20 yrs	0	841	Normal	Normal	57.5333	No	unemployed	One	No	0	0	0	0	0	0	0	0	0	0	0	0	0	0	0	0
6515	525	1	Gauteng	Black	Single	Completed Secondary	Unemployed	Yes	15	No	20	1	No	2 to 3 times a week	Yes	No	No			SA	Not married	350 and above	Secondary	10-15 yrs	6515	525	Normal	Normal		Yes	unemployed	One	No	0	0	0	0	0	0	0	0	0	0	0	0	0	0	0	0
0	189	1	Gauteng	Black	Single	Completed Secondary	Self employed	Yes	19	No	60	1	No	2 to 4 times a month	No	No	No			SA	Not married	Less than 350	Secondary	16-20 yrs	0	189	Cytology		33.2	Yes	Employed	One	No	0	0	0	0	0	0	0	0	0	0	0	0	0	0	1	1
-99	461	1	Gauteng	Black	Single	Incomplete Secondary	Unemployed	Yes	14	No	35	1	No	2 to 4 times a month	Yes	No	No			SA	Not married	350 and above	Secondary	10-15 yrs	-99	461	ASCUS	Abnormal	27.1667			One	No	0	0	0	0	0	0	0	0	0	0	0	0	0	0	0	0
40	221	1	Mpumalanga	Black	Married	Incomplete Secondary	Unemployed	Yes	14	No	28	1	No	Once a month or less	No	No	No			SA	Currently Married	Less than 350	Secondary	10-15 yrs	40	221	Normal	Normal	51.5	Yes	unemployed			0	0	0	0	0	0	0	0	0	0	0	0	0	0	0	0
[truncated: 123 more columns]
