# Supplementary material
Source: publisher figshare collection journal article supplement (https://plos.figshare.com/articles/dataset/_/11324555)
Supplement: Supplementary file 1 [file 1 › pone.0225571.s004.pdf]

**Case Report Form****HIM: Enrolment visit****Participant ID****Visit Date****Staff Initials****Visit Code**

□□□□-□

□□/□□□/□□□□

□□□

□□.□

**DD / MM / YY YY****INFORMED CONSENT FORM FOR PHOTOGRAPHY**

Has the participant consented for to have photographs of genital lesion to be taken.

Yes

☐

No

☐**1. SOCIO-DEMOGRAPHICS**

*I'd like to ask you some questions of a personal nature. Please be as honest as you can in your responses. Remember that your responses are confidential and will not be shared with anyone else. This information will be used solely for research purposes.*

1.1 Where were you born?

Gauteng ☐North West Province ☐KwaZulu-Natal ☐Mpumalanga ☐Eastern Cape ☐Western Cape ☐Free State ☐Northern Cape ☐Limpopo ☐Outside South Africa ☐ →Specify \_\_\_\_\_

1.2 Which ethnic group do you belong to?

Black ☐Coloured ☐White ☐Indian ☐Other ☐ →Specify \_\_\_\_\_

1.3 What is your home language ?

isiZulu ☐Ndebele ☐SeSotho ☐Tshivenda ☐isiXhosa ☐Xitsonga ☐SeTswana ☐English ☐SePedi ☐Afrikaans ☐SiSwati ☐Other ☐ →Specify \_\_\_\_\_→Tick **ONLY** one option

1.4 How long have you lived in Johannesburg?

<1 month ☐1-12months ☐> 1 year ☐ →Years

|                                                                                                                                                                                                                                                                                                                                                                                                                                                                                                                                                                                                                                                                                                                                                                                                                                                                   |  |
|-------------------------------------------------------------------------------------------------------------------------------------------------------------------------------------------------------------------------------------------------------------------------------------------------------------------------------------------------------------------------------------------------------------------------------------------------------------------------------------------------------------------------------------------------------------------------------------------------------------------------------------------------------------------------------------------------------------------------------------------------------------------------------------------------------------------------------------------------------------------|--|
| 1.5 How many nights did you sleep outside of Johannesburg in the past 3 months? → <input type="text"/> <input type="text"/> number                                                                                                                                                                                                                                                                                                                                                                                                                                                                                                                                                                                                                                                                                                                                |  |
| 1.6 Are you planning to travel outside of Johannesburg in the next 12 months for more than a month at a time? Yes <input type="checkbox"/> No <input type="checkbox"/>                                                                                                                                                                                                                                                                                                                                                                                                                                                                                                                                                                                                                                                                                            |  |
| 1.7.a What is your current marital status? <div style="display: flex; justify-content: space-between; margin-top: 5px;"> <span>Single <input type="checkbox"/></span> <span>Divorced/ separated <input type="checkbox"/></span> </div> <div style="display: flex; justify-content: space-between; margin-top: 5px;"> <span>Married <input type="checkbox"/></span> <span>Widowed <input type="checkbox"/></span> </div> <div style="display: flex; justify-content: space-between; margin-top: 10px;"> <span>→1.7.b IF <b>MARRIED</b>, do you have more than one wife?</span> <div>             Yes <input type="checkbox"/> → Number <input type="text"/> <input type="text"/><br/>             No <input type="checkbox"/> </div> </div>                                                                                                                        |  |
| 1.8.a Do you have children? Yes <input type="checkbox"/> No <input type="checkbox"/><br><br><div style="border-left: 1px solid black; padding-left: 10px; margin-left: 10px;">           →1.8.b IF <b>YES</b>, and number of children &gt; 1<br/>           do all your children have the same mother do all your children have the same mother? Yes <input type="checkbox"/> No <input type="checkbox"/> <div style="text-align: right; margin-top: 5px;">→ Number <input type="text"/> <input type="text"/></div> </div>                                                                                                                                                                                                                                                                                                                                        |  |
| 1.9 With whom do you live primarily? <div style="display: flex; justify-content: space-between; margin-top: 5px;"> <span>Alone <input type="checkbox"/></span> <span>Partner <input type="checkbox"/></span> </div> <div style="display: flex; justify-content: space-between; margin-top: 5px;"> <span>Family <input type="checkbox"/></span> <span>Parents <input type="checkbox"/></span> </div> <div style="display: flex; justify-content: space-between; margin-top: 5px;"> <span>Sister <input type="checkbox"/></span> <span>Relatives <input type="checkbox"/></span> </div> <div style="display: flex; justify-content: space-between; margin-top: 5px;"> <span>Friend <input type="checkbox"/></span> <span>Shelter <input type="checkbox"/></span> </div> <div style="margin-top: 5px;">           Other<br/>           →Specify _____         </div> |  |
| 1.10 What type of housing do you stay in? <div style="display: flex; justify-content: space-between; margin-top: 5px;"> <span>Room in house/flat(shared accommodation) <input type="checkbox"/></span> <span>Hostel <input type="checkbox"/></span> </div> <div style="display: flex; justify-content: space-between; margin-top: 5px;"> <span>Flat <input type="checkbox"/></span> <span>Student Residence <input type="checkbox"/></span> </div> <div style="display: flex; justify-content: space-between; margin-top: 5px;"> <span>House <input type="checkbox"/></span> <span>Informal Dwelling <input type="checkbox"/></span> </div>                                                                                                                                                                                                                       |  |
| 1.11 What is the <b>highest</b> level of education you have completed? <div style="display: flex; justify-content: space-between; margin-top: 5px;"> <span>No Schooling <input type="checkbox"/></span> <span>Incomplete secondary(up to grade 11 or equivalent) <input type="checkbox"/></span> </div> <div style="display: flex; justify-content: space-between; margin-top: 5px;"> <span>Primary <input type="checkbox"/></span> <span>Completed secondary(Grade 12 or equivalent) <input type="checkbox"/></span> </div> <div style="text-align: right; margin-top: 5px;">Graduate/ postgraduate <input type="checkbox"/></div>                                                                                                                                                                                                                               |  |
| 1.12 What is your current employment status? <div style="display: flex; justify-content: space-between; margin-top: 5px;"> <span>Unemployed <input type="checkbox"/></span> <span>Retired <input type="checkbox"/></span> </div> <div style="display: flex; justify-content: space-between; margin-top: 5px;"> <span>Employed full-time <input type="checkbox"/></span> <span>Other <input type="checkbox"/></span> </div> <div style="display: flex; justify-content: space-between; margin-top: 5px;"> <span>Employed part-time <input type="checkbox"/></span> <span>Specify↓</span> </div> <div style="display: flex; justify-content: space-between; margin-top: 5px;"> <span>Self-employed <input type="checkbox"/></span> <span>_____</span> </div>                                                                                                        |  |
| 1.13 What is your main occupation (or last occupation if currently <div style="display: flex; justify-content: space-between; margin-top: 5px;"> <span>Security guard <input type="checkbox"/></span> <span>Trader <input type="checkbox"/></span> </div>                                                                                                                                                                                                                                                                                                                                                                                                                                                                                                                                                                                                         |  |

| unemployed)?<br><br>→Tick <b>ONLY</b> one option                                                                                                                                                         | Service(waiter, cleaning) <input type="checkbox"/><br><br>Builder/labourer <input type="checkbox"/><br><br>Sales assistant/cashier <input type="checkbox"/><br><br>Scholar/student <input type="checkbox"/>                                                                                                                                                                                                                                                                                                                                                                                                                                                                                                                                                                                                                                                                                                                                                                                                                                                                                                                                                                     | Driver <input type="checkbox"/><br><br>Administrator/clerk <input type="checkbox"/><br><br>Professional <input type="checkbox"/><br><i>(teacher, nurse, engineer, etc)</i> |                               |                               |                               |                               |                          |          |                          |                          |        |                          |                          |            |                          |                          |       |                          |                          |            |                          |                          |  |  |  |  |
|----------------------------------------------------------------------------------------------------------------------------------------------------------------------------------------------------------|---------------------------------------------------------------------------------------------------------------------------------------------------------------------------------------------------------------------------------------------------------------------------------------------------------------------------------------------------------------------------------------------------------------------------------------------------------------------------------------------------------------------------------------------------------------------------------------------------------------------------------------------------------------------------------------------------------------------------------------------------------------------------------------------------------------------------------------------------------------------------------------------------------------------------------------------------------------------------------------------------------------------------------------------------------------------------------------------------------------------------------------------------------------------------------|----------------------------------------------------------------------------------------------------------------------------------------------------------------------------|-------------------------------|-------------------------------|-------------------------------|-------------------------------|--------------------------|----------|--------------------------|--------------------------|--------|--------------------------|--------------------------|------------|--------------------------|--------------------------|-------|--------------------------|--------------------------|------------|--------------------------|--------------------------|--|--|--|--|
| 1.14 Where do you usually seek health care?<br><br>→Tick <b>ONLY</b> one option                                                                                                                          | Primary health care facility <input type="checkbox"/><br><br>Traditional healer <input type="checkbox"/>                                                                                                                                                                                                                                                                                                                                                                                                                                                                                                                                                                                                                                                                                                                                                                                                                                                                                                                                                                                                                                                                        | Pharmacy <input type="checkbox"/><br><br>Private doctor <input type="checkbox"/>                                                                                           |                               |                               |                               |                               |                          |          |                          |                          |        |                          |                          |            |                          |                          |       |                          |                          |            |                          |                          |  |  |  |  |
| 1.15 On a scale of 0 to 5 [where 0 is never and 5 is always] how often do you and your family go without eating food in an average month?                                                                | <input type="checkbox"/><br>0                                                                                                                                                                                                                                                                                                                                                                                                                                                                                                                                                                                                                                                                                                                                                                                                                                                                                                                                                                                                                                                                                                                                                   | <input type="checkbox"/><br>1                                                                                                                                              | <input type="checkbox"/><br>2 | <input type="checkbox"/><br>3 | <input type="checkbox"/><br>4 | <input type="checkbox"/><br>5 |                          |          |                          |                          |        |                          |                          |            |                          |                          |       |                          |                          |            |                          |                          |  |  |  |  |
| 1.16 On a scale of 0 to 5 [where 0 is easy and 5 is difficult] how easy or difficult would it be for you to find R100 for medicines if a person in your family became ill and needed treatment urgently? | <input type="checkbox"/><br>0                                                                                                                                                                                                                                                                                                                                                                                                                                                                                                                                                                                                                                                                                                                                                                                                                                                                                                                                                                                                                                                                                                                                                   | <input type="checkbox"/><br>1                                                                                                                                              | <input type="checkbox"/><br>2 | <input type="checkbox"/><br>3 | <input type="checkbox"/><br>4 | <input type="checkbox"/><br>5 |                          |          |                          |                          |        |                          |                          |            |                          |                          |       |                          |                          |            |                          |                          |  |  |  |  |
| 1.17 Do you personally own any of the following items?                                                                                                                                                   | <table border="0" style="width: 100%;"> <thead> <tr> <th style="text-align: left;">Items</th> <th style="text-align: center;">Yes</th> <th style="text-align: center;">No</th> </tr> </thead> <tbody> <tr> <td>Working car</td> <td style="text-align: center;"><input type="checkbox"/></td> <td style="text-align: center;"><input type="checkbox"/></td> </tr> <tr> <td>Computer</td> <td style="text-align: center;"><input type="checkbox"/></td> <td style="text-align: center;"><input type="checkbox"/></td> </tr> <tr> <td>Fridge</td> <td style="text-align: center;"><input type="checkbox"/></td> <td style="text-align: center;"><input type="checkbox"/></td> </tr> <tr> <td>Television</td> <td style="text-align: center;"><input type="checkbox"/></td> <td style="text-align: center;"><input type="checkbox"/></td> </tr> <tr> <td>Radio</td> <td style="text-align: center;"><input type="checkbox"/></td> <td style="text-align: center;"><input type="checkbox"/></td> </tr> <tr> <td>Cell phone</td> <td style="text-align: center;"><input type="checkbox"/></td> <td style="text-align: center;"><input type="checkbox"/></td> </tr> </tbody> </table> | Items                                                                                                                                                                      | Yes                           | No                            | Working car                   | <input type="checkbox"/>      | <input type="checkbox"/> | Computer | <input type="checkbox"/> | <input type="checkbox"/> | Fridge | <input type="checkbox"/> | <input type="checkbox"/> | Television | <input type="checkbox"/> | <input type="checkbox"/> | Radio | <input type="checkbox"/> | <input type="checkbox"/> | Cell phone | <input type="checkbox"/> | <input type="checkbox"/> |  |  |  |  |
| Items                                                                                                                                                                                                    | Yes                                                                                                                                                                                                                                                                                                                                                                                                                                                                                                                                                                                                                                                                                                                                                                                                                                                                                                                                                                                                                                                                                                                                                                             | No                                                                                                                                                                         |                               |                               |                               |                               |                          |          |                          |                          |        |                          |                          |            |                          |                          |       |                          |                          |            |                          |                          |  |  |  |  |
| Working car                                                                                                                                                                                              | <input type="checkbox"/>                                                                                                                                                                                                                                                                                                                                                                                                                                                                                                                                                                                                                                                                                                                                                                                                                                                                                                                                                                                                                                                                                                                                                        | <input type="checkbox"/>                                                                                                                                                   |                               |                               |                               |                               |                          |          |                          |                          |        |                          |                          |            |                          |                          |       |                          |                          |            |                          |                          |  |  |  |  |
| Computer                                                                                                                                                                                                 | <input type="checkbox"/>                                                                                                                                                                                                                                                                                                                                                                                                                                                                                                                                                                                                                                                                                                                                                                                                                                                                                                                                                                                                                                                                                                                                                        | <input type="checkbox"/>                                                                                                                                                   |                               |                               |                               |                               |                          |          |                          |                          |        |                          |                          |            |                          |                          |       |                          |                          |            |                          |                          |  |  |  |  |
| Fridge                                                                                                                                                                                                   | <input type="checkbox"/>                                                                                                                                                                                                                                                                                                                                                                                                                                                                                                                                                                                                                                                                                                                                                                                                                                                                                                                                                                                                                                                                                                                                                        | <input type="checkbox"/>                                                                                                                                                   |                               |                               |                               |                               |                          |          |                          |                          |        |                          |                          |            |                          |                          |       |                          |                          |            |                          |                          |  |  |  |  |
| Television                                                                                                                                                                                               | <input type="checkbox"/>                                                                                                                                                                                                                                                                                                                                                                                                                                                                                                                                                                                                                                                                                                                                                                                                                                                                                                                                                                                                                                                                                                                                                        | <input type="checkbox"/>                                                                                                                                                   |                               |                               |                               |                               |                          |          |                          |                          |        |                          |                          |            |                          |                          |       |                          |                          |            |                          |                          |  |  |  |  |
| Radio                                                                                                                                                                                                    | <input type="checkbox"/>                                                                                                                                                                                                                                                                                                                                                                                                                                                                                                                                                                                                                                                                                                                                                                                                                                                                                                                                                                                                                                                                                                                                                        | <input type="checkbox"/>                                                                                                                                                   |                               |                               |                               |                               |                          |          |                          |                          |        |                          |                          |            |                          |                          |       |                          |                          |            |                          |                          |  |  |  |  |
| Cell phone                                                                                                                                                                                               | <input type="checkbox"/>                                                                                                                                                                                                                                                                                                                                                                                                                                                                                                                                                                                                                                                                                                                                                                                                                                                                                                                                                                                                                                                                                                                                                        | <input type="checkbox"/>                                                                                                                                                   |                               |                               |                               |                               |                          |          |                          |                          |        |                          |                          |            |                          |                          |       |                          |                          |            |                          |                          |  |  |  |  |
| 1.18 What was your monthly income <b>on average</b> in the last 3 months?                                                                                                                                | R <input type="text"/> <input type="text"/> <input type="text"/> <input type="text"/> <input type="text"/> <input type="text"/> . <input type="text"/> <input type="text"/>                                                                                                                                                                                                                                                                                                                                                                                                                                                                                                                                                                                                                                                                                                                                                                                                                                                                                                                                                                                                     |                                                                                                                                                                            |                               |                               |                               |                               |                          |          |                          |                          |        |                          |                          |            |                          |                          |       |                          |                          |            |                          |                          |  |  |  |  |

→Go to 2. ENVIRONMENT

|                                                                                                    |
|----------------------------------------------------------------------------------------------------|
| <b>2. ENVIRONMENT</b>                                                                              |
| <i>Now I'd like to ask you some questions about your community and the place in which you live</i> |

|                                                                                                                                                          |                                    |                               |                                         |                                      |
|----------------------------------------------------------------------------------------------------------------------------------------------------------|------------------------------------|-------------------------------|-----------------------------------------|--------------------------------------|
| 2.1 In terms of violence, how safe do you consider your community/area/place in which you live?                                                          | Very safe <input type="checkbox"/> | Safe <input type="checkbox"/> | Unsafe <input type="checkbox"/>         | Very unsafe <input type="checkbox"/> |
| 2.2 How often have you heard about problems with crimes such as burglaries, hijackings, rapes, muggings or anything like that in the area that you live? | Never <input type="checkbox"/>     | Once <input type="checkbox"/> | More than once <input type="checkbox"/> |                                      |
| 2.3 How often have you heard about problems with violence directed against foreigners in the area that you live?                                         | Never <input type="checkbox"/>     | Once <input type="checkbox"/> | More than once <input type="checkbox"/> |                                      |
| 2.4 Have you ever experienced any burglaries, hijackings, rapes, muggings, or violence against foreigners, directed at you?                              | Never <input type="checkbox"/>     | Once <input type="checkbox"/> | More than once <input type="checkbox"/> |                                      |
| 2.5 Have you ever spent time in prison for a crime?                                                                                                      | Yes <input type="checkbox"/>       | No <input type="checkbox"/>   |                                         |                                      |

→Go to 3. PARTICIPATION IN RESEARCH

### 3. PARTICIPATION IN RESEARCH

Now I'd like to ask you some questions about your participation in this study

3.1 Where did you hear about this study? Source    Yes    No

Partner ☐ ☐

→ Tick **MULTIPLE RESPONSES** if applicable Community health worker ☐ ☐

SMS ☐ ☐

Male friend ☐ ☐

Radio ☐ ☐

Poster/leaflet ☐ ☐

Other ☐ ☐

Specify Other ↓

\_\_\_\_\_

3.2.a Have you told anyone about volunteering for this study? Yes ☐ ☐ No ☐

→ 3.2.b IF **YES**, whom did you tell and what was their reaction?

| Person                   | Yes                      | No                       | Positive                 | Negative                 | Indifferent              |
|--------------------------|--------------------------|--------------------------|--------------------------|--------------------------|--------------------------|
| Spouse/partner           | <input type="checkbox"/> |
| Parent                   | <input type="checkbox"/> |
| Sibling                  | <input type="checkbox"/> |
| Other relative           | <input type="checkbox"/> |
| Friends/neighbour        | <input type="checkbox"/> |
| Other health care worker | <input type="checkbox"/> |
| Priest/church elder      | <input type="checkbox"/> |
| Traditional healer       | <input type="checkbox"/> |

3.3 Have you ever taken part in any other trial for any medical products? Yes ☐ → Date  / /

No ☐

→ Go to 4. MEDICAL HISTORY

| 4. MEDICAL HISTORY                                                              |                          |                          |                              |                             |
|---------------------------------------------------------------------------------|--------------------------|--------------------------|------------------------------|-----------------------------|
| Now, I'd like to ask you some general questions about your health.              |                          |                          |                              |                             |
| 4.1 Have you ever suffered from any diseases of the:                            | Yes                      | No                       | Don't Know                   | →IF YES give details:       |
| Heart                                                                           | <input type="checkbox"/> | <input type="checkbox"/> | <input type="checkbox"/>     |                             |
| Lungs                                                                           | <input type="checkbox"/> | <input type="checkbox"/> | <input type="checkbox"/>     |                             |
| Liver                                                                           | <input type="checkbox"/> | <input type="checkbox"/> | <input type="checkbox"/>     |                             |
| Kidneys                                                                         | <input type="checkbox"/> | <input type="checkbox"/> | <input type="checkbox"/>     |                             |
| Blood                                                                           | <input type="checkbox"/> | <input type="checkbox"/> | <input type="checkbox"/>     |                             |
| Digestive system                                                                | <input type="checkbox"/> | <input type="checkbox"/> | <input type="checkbox"/>     |                             |
| Brain and nerves                                                                | <input type="checkbox"/> | <input type="checkbox"/> | <input type="checkbox"/>     |                             |
| Hormonal system                                                                 | <input type="checkbox"/> | <input type="checkbox"/> | <input type="checkbox"/>     |                             |
| Skin                                                                            | <input type="checkbox"/> | <input type="checkbox"/> | <input type="checkbox"/>     |                             |
| Autoimmune                                                                      | <input type="checkbox"/> | <input type="checkbox"/> | <input type="checkbox"/>     |                             |
| 4.2 Have you ever suffered from jaundice or hepatitis?                          |                          |                          | Yes <input type="checkbox"/> | No <input type="checkbox"/> |
|                                                                                 |                          |                          | ↓details                     |                             |
| 4.3 Have you ever had fits, faints, seizures or convulsions after the age of 5? |                          |                          | Yes <input type="checkbox"/> | No <input type="checkbox"/> |
| 4.4 Have you ever had any psychiatric problems?                                 |                          |                          | Yes <input type="checkbox"/> | No <input type="checkbox"/> |
| 4.5 Have you or your family ever had any bleeding or clotting disorders?        |                          |                          | Yes <input type="checkbox"/> | No <input type="checkbox"/> |
| 4.6 Have you ever had a blood transfusion or received blood products?           |                          |                          | Yes <input type="checkbox"/> | No <input type="checkbox"/> |
| 4.7 Do you suffer from eczema or asthma?                                        |                          |                          | Yes <input type="checkbox"/> | No <input type="checkbox"/> |
| 4.8 Have you ever suffered from TB?                                             |                          |                          | Yes <input type="checkbox"/> | No <input type="checkbox"/> |
| 4.9 Have you ever suffered from shingles?                                       |                          |                          | Yes <input type="checkbox"/> | No <input type="checkbox"/> |

| 4.10 What is the WHO clinical stage?                                                                      | I <input type="checkbox"/><br>II <input type="checkbox"/><br>III <input type="checkbox"/><br>IV <input type="checkbox"/>                                                                                                                                                                                                                                                                                                                                                                                                                                                                                                                                                                                                                                                                                                                                                                                                                                                                                                                                                                                                                                                                                                                                                                                                                                                                                                                                                                                                                                                                                                                                                                                                                                                                                                                                                                                                                                                                                                                                                                                                                                                                                                                                                                                                                         |                          |     |    |                     |                          |                          |                               |                          |                          |                            |                          |                          |                                    |                          |                          |                                                  |                          |                          |                                                 |                          |                          |                                                                              |                          |                          |             |                          |                          |                |                          |                          |      |                          |                          |
|-----------------------------------------------------------------------------------------------------------|--------------------------------------------------------------------------------------------------------------------------------------------------------------------------------------------------------------------------------------------------------------------------------------------------------------------------------------------------------------------------------------------------------------------------------------------------------------------------------------------------------------------------------------------------------------------------------------------------------------------------------------------------------------------------------------------------------------------------------------------------------------------------------------------------------------------------------------------------------------------------------------------------------------------------------------------------------------------------------------------------------------------------------------------------------------------------------------------------------------------------------------------------------------------------------------------------------------------------------------------------------------------------------------------------------------------------------------------------------------------------------------------------------------------------------------------------------------------------------------------------------------------------------------------------------------------------------------------------------------------------------------------------------------------------------------------------------------------------------------------------------------------------------------------------------------------------------------------------------------------------------------------------------------------------------------------------------------------------------------------------------------------------------------------------------------------------------------------------------------------------------------------------------------------------------------------------------------------------------------------------------------------------------------------------------------------------------------------------|--------------------------|-----|----|---------------------|--------------------------|--------------------------|-------------------------------|--------------------------|--------------------------|----------------------------|--------------------------|--------------------------|------------------------------------|--------------------------|--------------------------|--------------------------------------------------|--------------------------|--------------------------|-------------------------------------------------|--------------------------|--------------------------|------------------------------------------------------------------------------|--------------------------|--------------------------|-------------|--------------------------|--------------------------|----------------|--------------------------|--------------------------|------|--------------------------|--------------------------|
| 4.11 How would you rate your health overall in the past 12 MONTHS?                                        | <div style="display: flex; justify-content: space-between;"> <div style="width: 45%;"> Excellent <input type="checkbox"/><br/> Very good <input type="checkbox"/><br/> Good <input type="checkbox"/> </div> <div style="width: 45%; text-align: right;"> Fair <input type="checkbox"/><br/> Poor (bad) <input type="checkbox"/> </div> </div>                                                                                                                                                                                                                                                                                                                                                                                                                                                                                                                                                                                                                                                                                                                                                                                                                                                                                                                                                                                                                                                                                                                                                                                                                                                                                                                                                                                                                                                                                                                                                                                                                                                                                                                                                                                                                                                                                                                                                                                                    |                          |     |    |                     |                          |                          |                               |                          |                          |                            |                          |                          |                                    |                          |                          |                                                  |                          |                          |                                                 |                          |                          |                                                                              |                          |                          |             |                          |                          |                |                          |                          |      |                          |                          |
| 4.12 In the last 12 MONTHS, did you suffer from any of the following health complaints:                   | <table style="width: 100%; border-collapse: collapse;"> <thead> <tr> <th style="width: 70%;"></th> <th style="width: 15%; text-align: center;">Yes</th> <th style="width: 15%; text-align: center;">No</th> </tr> </thead> <tbody> <tr><td style="text-align: right;">Fever for &gt; 1 month</td><td style="text-align: center;"><input type="checkbox"/></td><td style="text-align: center;"><input type="checkbox"/></td></tr> <tr><td style="text-align: right;">Persistent cough for &gt;1 month</td><td style="text-align: center;"><input type="checkbox"/></td><td style="text-align: center;"><input type="checkbox"/></td></tr> <tr><td style="text-align: right;">Night sweats for &gt; 1 month</td><td style="text-align: center;"><input type="checkbox"/></td><td style="text-align: center;"><input type="checkbox"/></td></tr> <tr><td style="text-align: right;">Pain or difficulty with swallowing</td><td style="text-align: center;"><input type="checkbox"/></td><td style="text-align: center;"><input type="checkbox"/></td></tr> <tr><td style="text-align: right;">Diarrhoea (i.e. &gt;2 loose stools/day) for &gt;1month</td><td style="text-align: center;"><input type="checkbox"/></td><td style="text-align: center;"><input type="checkbox"/></td></tr> <tr><td style="text-align: right;">Persistent mouth or genital sores for &gt; 1 month</td><td style="text-align: center;"><input type="checkbox"/></td><td style="text-align: center;"><input type="checkbox"/></td></tr> <tr><td style="text-align: right;">Unintended loss of weight (&gt; 10% body weight, i.e. &gt;7 kg for an average man)</td><td style="text-align: center;"><input type="checkbox"/></td><td style="text-align: center;"><input type="checkbox"/></td></tr> <tr><td style="text-align: right;">Skin rashes</td><td style="text-align: center;"><input type="checkbox"/></td><td style="text-align: center;"><input type="checkbox"/></td></tr> <tr><td style="text-align: right;">Swollen glands</td><td style="text-align: center;"><input type="checkbox"/></td><td style="text-align: center;"><input type="checkbox"/></td></tr> <tr><td style="text-align: right;">Fits</td><td style="text-align: center;"><input type="checkbox"/></td><td style="text-align: center;"><input type="checkbox"/></td></tr> </tbody> </table> |                          | Yes | No | Fever for > 1 month | <input type="checkbox"/> | <input type="checkbox"/> | Persistent cough for >1 month | <input type="checkbox"/> | <input type="checkbox"/> | Night sweats for > 1 month | <input type="checkbox"/> | <input type="checkbox"/> | Pain or difficulty with swallowing | <input type="checkbox"/> | <input type="checkbox"/> | Diarrhoea (i.e. >2 loose stools/day) for >1month | <input type="checkbox"/> | <input type="checkbox"/> | Persistent mouth or genital sores for > 1 month | <input type="checkbox"/> | <input type="checkbox"/> | Unintended loss of weight (> 10% body weight, i.e. >7 kg for an average man) | <input type="checkbox"/> | <input type="checkbox"/> | Skin rashes | <input type="checkbox"/> | <input type="checkbox"/> | Swollen glands | <input type="checkbox"/> | <input type="checkbox"/> | Fits | <input type="checkbox"/> | <input type="checkbox"/> |
|                                                                                                           | Yes                                                                                                                                                                                                                                                                                                                                                                                                                                                                                                                                                                                                                                                                                                                                                                                                                                                                                                                                                                                                                                                                                                                                                                                                                                                                                                                                                                                                                                                                                                                                                                                                                                                                                                                                                                                                                                                                                                                                                                                                                                                                                                                                                                                                                                                                                                                                              | No                       |     |    |                     |                          |                          |                               |                          |                          |                            |                          |                          |                                    |                          |                          |                                                  |                          |                          |                                                 |                          |                          |                                                                              |                          |                          |             |                          |                          |                |                          |                          |      |                          |                          |
| Fever for > 1 month                                                                                       | <input type="checkbox"/>                                                                                                                                                                                                                                                                                                                                                                                                                                                                                                                                                                                                                                                                                                                                                                                                                                                                                                                                                                                                                                                                                                                                                                                                                                                                                                                                                                                                                                                                                                                                                                                                                                                                                                                                                                                                                                                                                                                                                                                                                                                                                                                                                                                                                                                                                                                         | <input type="checkbox"/> |     |    |                     |                          |                          |                               |                          |                          |                            |                          |                          |                                    |                          |                          |                                                  |                          |                          |                                                 |                          |                          |                                                                              |                          |                          |             |                          |                          |                |                          |                          |      |                          |                          |
| Persistent cough for >1 month                                                                             | <input type="checkbox"/>                                                                                                                                                                                                                                                                                                                                                                                                                                                                                                                                                                                                                                                                                                                                                                                                                                                                                                                                                                                                                                                                                                                                                                                                                                                                                                                                                                                                                                                                                                                                                                                                                                                                                                                                                                                                                                                                                                                                                                                                                                                                                                                                                                                                                                                                                                                         | <input type="checkbox"/> |     |    |                     |                          |                          |                               |                          |                          |                            |                          |                          |                                    |                          |                          |                                                  |                          |                          |                                                 |                          |                          |                                                                              |                          |                          |             |                          |                          |                |                          |                          |      |                          |                          |
| Night sweats for > 1 month                                                                                | <input type="checkbox"/>                                                                                                                                                                                                                                                                                                                                                                                                                                                                                                                                                                                                                                                                                                                                                                                                                                                                                                                                                                                                                                                                                                                                                                                                                                                                                                                                                                                                                                                                                                                                                                                                                                                                                                                                                                                                                                                                                                                                                                                                                                                                                                                                                                                                                                                                                                                         | <input type="checkbox"/> |     |    |                     |                          |                          |                               |                          |                          |                            |                          |                          |                                    |                          |                          |                                                  |                          |                          |                                                 |                          |                          |                                                                              |                          |                          |             |                          |                          |                |                          |                          |      |                          |                          |
| Pain or difficulty with swallowing                                                                        | <input type="checkbox"/>                                                                                                                                                                                                                                                                                                                                                                                                                                                                                                                                                                                                                                                                                                                                                                                                                                                                                                                                                                                                                                                                                                                                                                                                                                                                                                                                                                                                                                                                                                                                                                                                                                                                                                                                                                                                                                                                                                                                                                                                                                                                                                                                                                                                                                                                                                                         | <input type="checkbox"/> |     |    |                     |                          |                          |                               |                          |                          |                            |                          |                          |                                    |                          |                          |                                                  |                          |                          |                                                 |                          |                          |                                                                              |                          |                          |             |                          |                          |                |                          |                          |      |                          |                          |
| Diarrhoea (i.e. >2 loose stools/day) for >1month                                                          | <input type="checkbox"/>                                                                                                                                                                                                                                                                                                                                                                                                                                                                                                                                                                                                                                                                                                                                                                                                                                                                                                                                                                                                                                                                                                                                                                                                                                                                                                                                                                                                                                                                                                                                                                                                                                                                                                                                                                                                                                                                                                                                                                                                                                                                                                                                                                                                                                                                                                                         | <input type="checkbox"/> |     |    |                     |                          |                          |                               |                          |                          |                            |                          |                          |                                    |                          |                          |                                                  |                          |                          |                                                 |                          |                          |                                                                              |                          |                          |             |                          |                          |                |                          |                          |      |                          |                          |
| Persistent mouth or genital sores for > 1 month                                                           | <input type="checkbox"/>                                                                                                                                                                                                                                                                                                                                                                                                                                                                                                                                                                                                                                                                                                                                                                                                                                                                                                                                                                                                                                                                                                                                                                                                                                                                                                                                                                                                                                                                                                                                                                                                                                                                                                                                                                                                                                                                                                                                                                                                                                                                                                                                                                                                                                                                                                                         | <input type="checkbox"/> |     |    |                     |                          |                          |                               |                          |                          |                            |                          |                          |                                    |                          |                          |                                                  |                          |                          |                                                 |                          |                          |                                                                              |                          |                          |             |                          |                          |                |                          |                          |      |                          |                          |
| Unintended loss of weight (> 10% body weight, i.e. >7 kg for an average man)                              | <input type="checkbox"/>                                                                                                                                                                                                                                                                                                                                                                                                                                                                                                                                                                                                                                                                                                                                                                                                                                                                                                                                                                                                                                                                                                                                                                                                                                                                                                                                                                                                                                                                                                                                                                                                                                                                                                                                                                                                                                                                                                                                                                                                                                                                                                                                                                                                                                                                                                                         | <input type="checkbox"/> |     |    |                     |                          |                          |                               |                          |                          |                            |                          |                          |                                    |                          |                          |                                                  |                          |                          |                                                 |                          |                          |                                                                              |                          |                          |             |                          |                          |                |                          |                          |      |                          |                          |
| Skin rashes                                                                                               | <input type="checkbox"/>                                                                                                                                                                                                                                                                                                                                                                                                                                                                                                                                                                                                                                                                                                                                                                                                                                                                                                                                                                                                                                                                                                                                                                                                                                                                                                                                                                                                                                                                                                                                                                                                                                                                                                                                                                                                                                                                                                                                                                                                                                                                                                                                                                                                                                                                                                                         | <input type="checkbox"/> |     |    |                     |                          |                          |                               |                          |                          |                            |                          |                          |                                    |                          |                          |                                                  |                          |                          |                                                 |                          |                          |                                                                              |                          |                          |             |                          |                          |                |                          |                          |      |                          |                          |
| Swollen glands                                                                                            | <input type="checkbox"/>                                                                                                                                                                                                                                                                                                                                                                                                                                                                                                                                                                                                                                                                                                                                                                                                                                                                                                                                                                                                                                                                                                                                                                                                                                                                                                                                                                                                                                                                                                                                                                                                                                                                                                                                                                                                                                                                                                                                                                                                                                                                                                                                                                                                                                                                                                                         | <input type="checkbox"/> |     |    |                     |                          |                          |                               |                          |                          |                            |                          |                          |                                    |                          |                          |                                                  |                          |                          |                                                 |                          |                          |                                                                              |                          |                          |             |                          |                          |                |                          |                          |      |                          |                          |
| Fits                                                                                                      | <input type="checkbox"/>                                                                                                                                                                                                                                                                                                                                                                                                                                                                                                                                                                                                                                                                                                                                                                                                                                                                                                                                                                                                                                                                                                                                                                                                                                                                                                                                                                                                                                                                                                                                                                                                                                                                                                                                                                                                                                                                                                                                                                                                                                                                                                                                                                                                                                                                                                                         | <input type="checkbox"/> |     |    |                     |                          |                          |                               |                          |                          |                            |                          |                          |                                    |                          |                          |                                                  |                          |                          |                                                 |                          |                          |                                                                              |                          |                          |             |                          |                          |                |                          |                          |      |                          |                          |
| 4.13 In the past 12 MONTHS, did a health care provider diagnose you with any of the following conditions: | <table style="width: 100%; border-collapse: collapse;"> <thead> <tr> <th style="width: 70%;"></th> <th style="width: 15%; text-align: center;">Yes</th> <th style="width: 15%; text-align: center;">No</th> </tr> </thead> <tbody> <tr><td style="text-align: right;">TB</td><td style="text-align: center;"><input type="checkbox"/></td><td style="text-align: center;"><input type="checkbox"/></td></tr> <tr><td style="text-align: right;">Pneumonia</td><td style="text-align: center;"><input type="checkbox"/></td><td style="text-align: center;"><input type="checkbox"/></td></tr> <tr><td style="text-align: right;">Shingles</td><td style="text-align: center;"><input type="checkbox"/></td><td style="text-align: center;"><input type="checkbox"/></td></tr> <tr><td style="text-align: right;">Oral thrush</td><td style="text-align: center;"><input type="checkbox"/></td><td style="text-align: center;"><input type="checkbox"/></td></tr> <tr><td style="text-align: right;">Meningitis</td><td style="text-align: center;"><input type="checkbox"/></td><td style="text-align: center;"><input type="checkbox"/></td></tr> <tr><td style="text-align: right;">Kaposi's Sarcoma</td><td style="text-align: center;"><input type="checkbox"/></td><td style="text-align: center;"><input type="checkbox"/></td></tr> </tbody> </table>                                                                                                                                                                                                                                                                                                                                                                                                                                                                                                                                                                                                                                                                                                                                                                                                                                                                                                                                                                                     |                          | Yes | No | TB                  | <input type="checkbox"/> | <input type="checkbox"/> | Pneumonia                     | <input type="checkbox"/> | <input type="checkbox"/> | Shingles                   | <input type="checkbox"/> | <input type="checkbox"/> | Oral thrush                        | <input type="checkbox"/> | <input type="checkbox"/> | Meningitis                                       | <input type="checkbox"/> | <input type="checkbox"/> | Kaposi's Sarcoma                                | <input type="checkbox"/> | <input type="checkbox"/> |                                                                              |                          |                          |             |                          |                          |                |                          |                          |      |                          |                          |
|                                                                                                           | Yes                                                                                                                                                                                                                                                                                                                                                                                                                                                                                                                                                                                                                                                                                                                                                                                                                                                                                                                                                                                                                                                                                                                                                                                                                                                                                                                                                                                                                                                                                                                                                                                                                                                                                                                                                                                                                                                                                                                                                                                                                                                                                                                                                                                                                                                                                                                                              | No                       |     |    |                     |                          |                          |                               |                          |                          |                            |                          |                          |                                    |                          |                          |                                                  |                          |                          |                                                 |                          |                          |                                                                              |                          |                          |             |                          |                          |                |                          |                          |      |                          |                          |
| TB                                                                                                        | <input type="checkbox"/>                                                                                                                                                                                                                                                                                                                                                                                                                                                                                                                                                                                                                                                                                                                                                                                                                                                                                                                                                                                                                                                                                                                                                                                                                                                                                                                                                                                                                                                                                                                                                                                                                                                                                                                                                                                                                                                                                                                                                                                                                                                                                                                                                                                                                                                                                                                         | <input type="checkbox"/> |     |    |                     |                          |                          |                               |                          |                          |                            |                          |                          |                                    |                          |                          |                                                  |                          |                          |                                                 |                          |                          |                                                                              |                          |                          |             |                          |                          |                |                          |                          |      |                          |                          |
| Pneumonia                                                                                                 | <input type="checkbox"/>                                                                                                                                                                                                                                                                                                                                                                                                                                                                                                                                                                                                                                                                                                                                                                                                                                                                                                                                                                                                                                                                                                                                                                                                                                                                                                                                                                                                                                                                                                                                                                                                                                                                                                                                                                                                                                                                                                                                                                                                                                                                                                                                                                                                                                                                                                                         | <input type="checkbox"/> |     |    |                     |                          |                          |                               |                          |                          |                            |                          |                          |                                    |                          |                          |                                                  |                          |                          |                                                 |                          |                          |                                                                              |                          |                          |             |                          |                          |                |                          |                          |      |                          |                          |
| Shingles                                                                                                  | <input type="checkbox"/>                                                                                                                                                                                                                                                                                                                                                                                                                                                                                                                                                                                                                                                                                                                                                                                                                                                                                                                                                                                                                                                                                                                                                                                                                                                                                                                                                                                                                                                                                                                                                                                                                                                                                                                                                                                                                                                                                                                                                                                                                                                                                                                                                                                                                                                                                                                         | <input type="checkbox"/> |     |    |                     |                          |                          |                               |                          |                          |                            |                          |                          |                                    |                          |                          |                                                  |                          |                          |                                                 |                          |                          |                                                                              |                          |                          |             |                          |                          |                |                          |                          |      |                          |                          |
| Oral thrush                                                                                               | <input type="checkbox"/>                                                                                                                                                                                                                                                                                                                                                                                                                                                                                                                                                                                                                                                                                                                                                                                                                                                                                                                                                                                                                                                                                                                                                                                                                                                                                                                                                                                                                                                                                                                                                                                                                                                                                                                                                                                                                                                                                                                                                                                                                                                                                                                                                                                                                                                                                                                         | <input type="checkbox"/> |     |    |                     |                          |                          |                               |                          |                          |                            |                          |                          |                                    |                          |                          |                                                  |                          |                          |                                                 |                          |                          |                                                                              |                          |                          |             |                          |                          |                |                          |                          |      |                          |                          |
| Meningitis                                                                                                | <input type="checkbox"/>                                                                                                                                                                                                                                                                                                                                                                                                                                                                                                                                                                                                                                                                                                                                                                                                                                                                                                                                                                                                                                                                                                                                                                                                                                                                                                                                                                                                                                                                                                                                                                                                                                                                                                                                                                                                                                                                                                                                                                                                                                                                                                                                                                                                                                                                                                                         | <input type="checkbox"/> |     |    |                     |                          |                          |                               |                          |                          |                            |                          |                          |                                    |                          |                          |                                                  |                          |                          |                                                 |                          |                          |                                                                              |                          |                          |             |                          |                          |                |                          |                          |      |                          |                          |
| Kaposi's Sarcoma                                                                                          | <input type="checkbox"/>                                                                                                                                                                                                                                                                                                                                                                                                                                                                                                                                                                                                                                                                                                                                                                                                                                                                                                                                                                                                                                                                                                                                                                                                                                                                                                                                                                                                                                                                                                                                                                                                                                                                                                                                                                                                                                                                                                                                                                                                                                                                                                                                                                                                                                                                                                                         | <input type="checkbox"/> |     |    |                     |                          |                          |                               |                          |                          |                            |                          |                          |                                    |                          |                          |                                                  |                          |                          |                                                 |                          |                          |                                                                              |                          |                          |             |                          |                          |                |                          |                          |      |                          |                          |
| 4.14 In the past 12 MONTHS, have you been admitted to hospital?                                           | Yes <input type="checkbox"/> → Specify _____<br>No <input type="checkbox"/>                                                                                                                                                                                                                                                                                                                                                                                                                                                                                                                                                                                                                                                                                                                                                                                                                                                                                                                                                                                                                                                                                                                                                                                                                                                                                                                                                                                                                                                                                                                                                                                                                                                                                                                                                                                                                                                                                                                                                                                                                                                                                                                                                                                                                                                                      |                          |     |    |                     |                          |                          |                               |                          |                          |                            |                          |                          |                                    |                          |                          |                                                  |                          |                          |                                                 |                          |                          |                                                                              |                          |                          |             |                          |                          |                |                          |                          |      |                          |                          |

|                                                                                                                  |                                                                                                                                                                                                                                                                                                                                              |                                                                                                                                                  |
|------------------------------------------------------------------------------------------------------------------|----------------------------------------------------------------------------------------------------------------------------------------------------------------------------------------------------------------------------------------------------------------------------------------------------------------------------------------------|--------------------------------------------------------------------------------------------------------------------------------------------------|
| <p>4.15 What is your ART status?</p>                                                                             | <p><b>Status</b></p> <p>Never taken ARVs   <input type="checkbox"/> <b>Go to 4.20</b></p> <p>On treatment   <input type="checkbox"/> <b>Go to 4.16</b></p> <p>Past prophylaxis   <input type="checkbox"/> <b>Go to 4.20</b></p>                                                                                                              |                                                                                                                                                  |
| <p>4.16a First date on ART</p>                                                                                   | <p><input type="text"/>/ <input type="text"/>/ <input type="text"/><input type="text"/><input type="text"/><br/>(dd/mm/yyyy)</p>                                                                                                                                                                                                             |                                                                                                                                                  |
| <p>4.16b For how long have you been on ART?</p>                                                                  | <p><input type="text"/><input type="text"/> years   <input type="text"/><input type="text"/> months</p>                                                                                                                                                                                                                                      |                                                                                                                                                  |
| <p>4.16c1 What is the ART code (Refer to the HIM-SA ATC code)</p> <p>4.16c2 What is the therapy edge number?</p> | <p><input type="text"/><input type="text"/><input type="text"/><input type="text"/><input type="text"/><input type="text"/><br/>(Drop down menu eg <b>Jo5XXo6</b>)</p> <p><input type="text"/><input type="text"/><input type="text"/><input type="text"/><input type="text"/><input type="text"/>   <b>N/A</b> <input type="checkbox"/></p> |                                                                                                                                                  |
| <p>4.17 What is the line of treatment?</p>                                                                       | <p>1 <input type="checkbox"/></p> <p>2 <input type="checkbox"/></p> <p>3 <input type="checkbox"/></p>                                                                                                                                                                                                                                        | <p>≥3   <input type="checkbox"/></p> <p>Missing   <input type="checkbox"/></p> <p>Unknown   <input type="checkbox"/></p>                         |
| <p>4.18 How well do you adhere to your ART?</p>                                                                  | <p><input type="checkbox"/> None (&lt; 10%)</p> <p><input type="checkbox"/> A few times (10-30%)</p> <p><input type="checkbox"/> About half the times (30-60%)</p>                                                                                                                                                                           | <p><input type="checkbox"/> Most of the times (60-90%)</p> <p><input type="checkbox"/> All (&gt;90%)</p> <p><input type="checkbox"/> Unknown</p> |

| <p>4.19 What are some of the reason(s) that make you not take your medication? <i>(Tick all that apply)</i></p>              | <table border="0"> <thead> <tr> <th>Reason</th> <th>Yes</th> <th>No</th> </tr> </thead> <tbody> <tr> <td>Toxicity</td> <td><input type="checkbox"/></td> <td><input type="checkbox"/></td> </tr> <tr> <td>Share with others</td> <td><input type="checkbox"/></td> <td><input type="checkbox"/></td> </tr> <tr> <td>Forgot</td> <td><input type="checkbox"/></td> <td><input type="checkbox"/></td> </tr> <tr> <td>Felt better</td> <td><input type="checkbox"/></td> <td><input type="checkbox"/></td> </tr> <tr> <td>Stock out</td> <td><input type="checkbox"/></td> <td><input type="checkbox"/></td> </tr> <tr> <td>Lost pills</td> <td><input type="checkbox"/></td> <td><input type="checkbox"/></td> </tr> </tbody> </table> | Reason                   | Yes | No | Toxicity | <input type="checkbox"/> | <input type="checkbox"/> | Share with others | <input type="checkbox"/> | <input type="checkbox"/> | Forgot | <input type="checkbox"/> | <input type="checkbox"/> | Felt better | <input type="checkbox"/> | <input type="checkbox"/> | Stock out | <input type="checkbox"/> | <input type="checkbox"/> | Lost pills | <input type="checkbox"/> | <input type="checkbox"/> | <table border="0"> <thead> <tr> <th>Reason</th> <th>Yes</th> <th>No</th> </tr> </thead> <tbody> <tr> <td>Missed appointment</td> <td><input type="checkbox"/></td> <td><input type="checkbox"/></td> </tr> <tr> <td>Ran out of Rx</td> <td><input type="checkbox"/></td> <td><input type="checkbox"/></td> </tr> <tr> <td>They taste badly</td> <td><input type="checkbox"/></td> <td><input type="checkbox"/></td> </tr> <tr> <td>Other</td> <td><input type="checkbox"/></td> <td><input type="checkbox"/></td> </tr> <tr> <td>Unknown</td> <td><input type="checkbox"/></td> <td><input type="checkbox"/></td> </tr> </tbody> </table> | Reason | Yes | No | Missed appointment | <input type="checkbox"/> | <input type="checkbox"/> | Ran out of Rx | <input type="checkbox"/> | <input type="checkbox"/> | They taste badly | <input type="checkbox"/> | <input type="checkbox"/> | Other | <input type="checkbox"/> | <input type="checkbox"/> | Unknown | <input type="checkbox"/> | <input type="checkbox"/> |
|------------------------------------------------------------------------------------------------------------------------------|--------------------------------------------------------------------------------------------------------------------------------------------------------------------------------------------------------------------------------------------------------------------------------------------------------------------------------------------------------------------------------------------------------------------------------------------------------------------------------------------------------------------------------------------------------------------------------------------------------------------------------------------------------------------------------------------------------------------------------------|--------------------------|-----|----|----------|--------------------------|--------------------------|-------------------|--------------------------|--------------------------|--------|--------------------------|--------------------------|-------------|--------------------------|--------------------------|-----------|--------------------------|--------------------------|------------|--------------------------|--------------------------|-------------------------------------------------------------------------------------------------------------------------------------------------------------------------------------------------------------------------------------------------------------------------------------------------------------------------------------------------------------------------------------------------------------------------------------------------------------------------------------------------------------------------------------------------------------------------------------------------------------------------------------------|--------|-----|----|--------------------|--------------------------|--------------------------|---------------|--------------------------|--------------------------|------------------|--------------------------|--------------------------|-------|--------------------------|--------------------------|---------|--------------------------|--------------------------|
| Reason                                                                                                                       | Yes                                                                                                                                                                                                                                                                                                                                                                                                                                                                                                                                                                                                                                                                                                                                  | No                       |     |    |          |                          |                          |                   |                          |                          |        |                          |                          |             |                          |                          |           |                          |                          |            |                          |                          |                                                                                                                                                                                                                                                                                                                                                                                                                                                                                                                                                                                                                                           |        |     |    |                    |                          |                          |               |                          |                          |                  |                          |                          |       |                          |                          |         |                          |                          |
| Toxicity                                                                                                                     | <input type="checkbox"/>                                                                                                                                                                                                                                                                                                                                                                                                                                                                                                                                                                                                                                                                                                             | <input type="checkbox"/> |     |    |          |                          |                          |                   |                          |                          |        |                          |                          |             |                          |                          |           |                          |                          |            |                          |                          |                                                                                                                                                                                                                                                                                                                                                                                                                                                                                                                                                                                                                                           |        |     |    |                    |                          |                          |               |                          |                          |                  |                          |                          |       |                          |                          |         |                          |                          |
| Share with others                                                                                                            | <input type="checkbox"/>                                                                                                                                                                                                                                                                                                                                                                                                                                                                                                                                                                                                                                                                                                             | <input type="checkbox"/> |     |    |          |                          |                          |                   |                          |                          |        |                          |                          |             |                          |                          |           |                          |                          |            |                          |                          |                                                                                                                                                                                                                                                                                                                                                                                                                                                                                                                                                                                                                                           |        |     |    |                    |                          |                          |               |                          |                          |                  |                          |                          |       |                          |                          |         |                          |                          |
| Forgot                                                                                                                       | <input type="checkbox"/>                                                                                                                                                                                                                                                                                                                                                                                                                                                                                                                                                                                                                                                                                                             | <input type="checkbox"/> |     |    |          |                          |                          |                   |                          |                          |        |                          |                          |             |                          |                          |           |                          |                          |            |                          |                          |                                                                                                                                                                                                                                                                                                                                                                                                                                                                                                                                                                                                                                           |        |     |    |                    |                          |                          |               |                          |                          |                  |                          |                          |       |                          |                          |         |                          |                          |
| Felt better                                                                                                                  | <input type="checkbox"/>                                                                                                                                                                                                                                                                                                                                                                                                                                                                                                                                                                                                                                                                                                             | <input type="checkbox"/> |     |    |          |                          |                          |                   |                          |                          |        |                          |                          |             |                          |                          |           |                          |                          |            |                          |                          |                                                                                                                                                                                                                                                                                                                                                                                                                                                                                                                                                                                                                                           |        |     |    |                    |                          |                          |               |                          |                          |                  |                          |                          |       |                          |                          |         |                          |                          |
| Stock out                                                                                                                    | <input type="checkbox"/>                                                                                                                                                                                                                                                                                                                                                                                                                                                                                                                                                                                                                                                                                                             | <input type="checkbox"/> |     |    |          |                          |                          |                   |                          |                          |        |                          |                          |             |                          |                          |           |                          |                          |            |                          |                          |                                                                                                                                                                                                                                                                                                                                                                                                                                                                                                                                                                                                                                           |        |     |    |                    |                          |                          |               |                          |                          |                  |                          |                          |       |                          |                          |         |                          |                          |
| Lost pills                                                                                                                   | <input type="checkbox"/>                                                                                                                                                                                                                                                                                                                                                                                                                                                                                                                                                                                                                                                                                                             | <input type="checkbox"/> |     |    |          |                          |                          |                   |                          |                          |        |                          |                          |             |                          |                          |           |                          |                          |            |                          |                          |                                                                                                                                                                                                                                                                                                                                                                                                                                                                                                                                                                                                                                           |        |     |    |                    |                          |                          |               |                          |                          |                  |                          |                          |       |                          |                          |         |                          |                          |
| Reason                                                                                                                       | Yes                                                                                                                                                                                                                                                                                                                                                                                                                                                                                                                                                                                                                                                                                                                                  | No                       |     |    |          |                          |                          |                   |                          |                          |        |                          |                          |             |                          |                          |           |                          |                          |            |                          |                          |                                                                                                                                                                                                                                                                                                                                                                                                                                                                                                                                                                                                                                           |        |     |    |                    |                          |                          |               |                          |                          |                  |                          |                          |       |                          |                          |         |                          |                          |
| Missed appointment                                                                                                           | <input type="checkbox"/>                                                                                                                                                                                                                                                                                                                                                                                                                                                                                                                                                                                                                                                                                                             | <input type="checkbox"/> |     |    |          |                          |                          |                   |                          |                          |        |                          |                          |             |                          |                          |           |                          |                          |            |                          |                          |                                                                                                                                                                                                                                                                                                                                                                                                                                                                                                                                                                                                                                           |        |     |    |                    |                          |                          |               |                          |                          |                  |                          |                          |       |                          |                          |         |                          |                          |
| Ran out of Rx                                                                                                                | <input type="checkbox"/>                                                                                                                                                                                                                                                                                                                                                                                                                                                                                                                                                                                                                                                                                                             | <input type="checkbox"/> |     |    |          |                          |                          |                   |                          |                          |        |                          |                          |             |                          |                          |           |                          |                          |            |                          |                          |                                                                                                                                                                                                                                                                                                                                                                                                                                                                                                                                                                                                                                           |        |     |    |                    |                          |                          |               |                          |                          |                  |                          |                          |       |                          |                          |         |                          |                          |
| They taste badly                                                                                                             | <input type="checkbox"/>                                                                                                                                                                                                                                                                                                                                                                                                                                                                                                                                                                                                                                                                                                             | <input type="checkbox"/> |     |    |          |                          |                          |                   |                          |                          |        |                          |                          |             |                          |                          |           |                          |                          |            |                          |                          |                                                                                                                                                                                                                                                                                                                                                                                                                                                                                                                                                                                                                                           |        |     |    |                    |                          |                          |               |                          |                          |                  |                          |                          |       |                          |                          |         |                          |                          |
| Other                                                                                                                        | <input type="checkbox"/>                                                                                                                                                                                                                                                                                                                                                                                                                                                                                                                                                                                                                                                                                                             | <input type="checkbox"/> |     |    |          |                          |                          |                   |                          |                          |        |                          |                          |             |                          |                          |           |                          |                          |            |                          |                          |                                                                                                                                                                                                                                                                                                                                                                                                                                                                                                                                                                                                                                           |        |     |    |                    |                          |                          |               |                          |                          |                  |                          |                          |       |                          |                          |         |                          |                          |
| Unknown                                                                                                                      | <input type="checkbox"/>                                                                                                                                                                                                                                                                                                                                                                                                                                                                                                                                                                                                                                                                                                             | <input type="checkbox"/> |     |    |          |                          |                          |                   |                          |                          |        |                          |                          |             |                          |                          |           |                          |                          |            |                          |                          |                                                                                                                                                                                                                                                                                                                                                                                                                                                                                                                                                                                                                                           |        |     |    |                    |                          |                          |               |                          |                          |                  |                          |                          |       |                          |                          |         |                          |                          |
| <p>4.20a Are you on any prescribed medications?</p>                                                                          | <p>Yes No</p> <p><input type="checkbox"/> <input type="checkbox"/></p> <p><b>If yes fill the Concomitant Log</b></p>                                                                                                                                                                                                                                                                                                                                                                                                                                                                                                                                                                                                                 |                          |     |    |          |                          |                          |                   |                          |                          |        |                          |                          |             |                          |                          |           |                          |                          |            |                          |                          |                                                                                                                                                                                                                                                                                                                                                                                                                                                                                                                                                                                                                                           |        |     |    |                    |                          |                          |               |                          |                          |                  |                          |                          |       |                          |                          |         |                          |                          |
| <p>4.20b Are you on any other medication including traditional, home remedies or over the counter?</p>                       | <p>Yes No</p> <p><input type="checkbox"/> <input type="checkbox"/></p>                                                                                                                                                                                                                                                                                                                                                                                                                                                                                                                                                                                                                                                               |                          |     |    |          |                          |                          |                   |                          |                          |        |                          |                          |             |                          |                          |           |                          |                          |            |                          |                          |                                                                                                                                                                                                                                                                                                                                                                                                                                                                                                                                                                                                                                           |        |     |    |                    |                          |                          |               |                          |                          |                  |                          |                          |       |                          |                          |         |                          |                          |
| <p>4.21a Do you know what was your lowest <b>(nadir)</b> CD4+ ?</p> <p>4.21b When was the count and date of nadir CD4+ ?</p> | <p>Yes No</p> <p><input type="checkbox"/> <input type="checkbox"/> <b>If yes go to 4.21b</b></p> <p><b>If no go 5.</b></p> <p>CD+4 Count <input type="text"/><input type="text"/><input type="text"/></p> <p><b>Date</b> <input type="text"/><input type="text"/><input type="text"/><input type="text"/><input type="text"/><input type="text"/><br/> <b>(dd/mm/yyyy)</b></p>                                                                                                                                                                                                                                                                                                                                                       |                          |     |    |          |                          |                          |                   |                          |                          |        |                          |                          |             |                          |                          |           |                          |                          |            |                          |                          |                                                                                                                                                                                                                                                                                                                                                                                                                                                                                                                                                                                                                                           |        |     |    |                    |                          |                          |               |                          |                          |                  |                          |                          |       |                          |                          |         |                          |                          |

## 5. LIFESTYLE AND RISK BEHAVIOURS

Now I'm going to ask you some questions about your use of alcohol, tobacco and other drugs. I am going to ask you questions about your experiences of using these substances across your lifetime and more recently. While some of this information may be embarrassing or difficult to remember, please try and answer as truthfully as you can. Your responses are confidential and will only be recorded for research purposes.

### 5.1 Alcohol

|                                                         | 0                        | 1                        | 2                        | 3                        | 4                        |
|---------------------------------------------------------|--------------------------|--------------------------|--------------------------|--------------------------|--------------------------|
|                                                         | Never                    | Once a month or less     | 2 to 4 times a month     | 2 to 3 times a week      | 4 or more times a week   |
| 5.1.1 How often do you have a drink containing alcohol? | <input type="checkbox"/> |

→ IF 0, skip to 5.2 Smoking

5.1.2 What kind of alcohol do you usually drink?

Type of alcohol Yes NO

Type of alcohol Yes NO

Beer/cider/alco-pop ☐ ☐

Wine/champagne/port/sherry ☐ ☐

Spirits ☐ ☐

Home-brew/traditional beer ☐ ☐

→ Tick **MULTIPLE RESPONSES** if applicable

Other Specify \_\_\_\_\_ ↓

|                                                                                                                                                                                                                                   | 0                        | 1                        | 2                        | 3                        | 4                        |
|-----------------------------------------------------------------------------------------------------------------------------------------------------------------------------------------------------------------------------------|--------------------------|--------------------------|--------------------------|--------------------------|--------------------------|
|                                                                                                                                                                                                                                   | 1 or 2                   | 3 or 4                   | 5 or 6                   | 7 to 9                   | 10 or more               |
| 5.1.3 How many drinks containing alcohol do you have on a typical day when you are drinking?<br><br><b>A drink is defined as....</b><br><b>1 can (330 ml) beer</b><br><b>1 small glass (140 ml) wine</b><br><b>1 shot spirits</b> | <input type="checkbox"/> |
|                                                                                                                                                                                                                                   | Never                    | Less than monthly        | Monthly                  | Weekly                   | Daily or almost daily    |
| 5.1.4 How often do you have 6 or more drinks on one occasion?                                                                                                                                                                     | <input type="checkbox"/> |

SCORE

=

→IF question 5.1.4 is 0, skip to 5.2 Smoking

↓For respondents who have 6 or more drinks on one occasion

|                                                                                                                                                | 0                        | 1                        | 2                             | 3                        | 4                         |
|------------------------------------------------------------------------------------------------------------------------------------------------|--------------------------|--------------------------|-------------------------------|--------------------------|---------------------------|
|                                                                                                                                                | Never                    | Less than monthly        | Monthly                       | Weekly                   | Daily or almost daily     |
| 5.1.5 How often during the last 12 months have you found that you were not able to stop drinking once you started?                             | <input type="checkbox"/> | <input type="checkbox"/> | <input type="checkbox"/>      | <input type="checkbox"/> | <input type="checkbox"/>  |
| 5.1.6 How often during the last 12 months did you fail to do what was normally expected of you because of drinking?                            | <input type="checkbox"/> | <input type="checkbox"/> | <input type="checkbox"/>      | <input type="checkbox"/> | <input type="checkbox"/>  |
| 5.1.7 How often in the last 12 months have you needed a drink first thing in the morning to get yourself going after a heavy drinking session? | <input type="checkbox"/> | <input type="checkbox"/> | <input type="checkbox"/>      | <input type="checkbox"/> | <input type="checkbox"/>  |
| 5.1.8 How often in the past 12 months have you had a feeling of guilt or remorse after drinking?                                               | <input type="checkbox"/> | <input type="checkbox"/> | <input type="checkbox"/>      | <input type="checkbox"/> | <input type="checkbox"/>  |
| 5.1.9 How often in the past 12 months have you been unable to remember what happened the night before because of your drinking?                | <input type="checkbox"/> | <input type="checkbox"/> | <input type="checkbox"/>      | <input type="checkbox"/> | <input type="checkbox"/>  |
|                                                                                                                                                | No                       |                          | Yes, but not in the last year |                          | Yes, during the last year |
| 5.1.10 Have you or someone else been injured as a result of your drinking?                                                                     | <input type="checkbox"/> |                          | <input type="checkbox"/>      |                          | <input type="checkbox"/>  |
| 5.1.11 Has a relative, friend, doctor or other health care worker been concerned about your drinking or suggested that you cut down?           | <input type="checkbox"/> |                          | <input type="checkbox"/>      |                          | <input type="checkbox"/>  |

|  |              |   |
|--|--------------|---|
|  | <b>SCORE</b> | = |
|--|--------------|---|

## 5.2 Smoking

|                                                          |                              |                                                                                                                                                                                                            |
|----------------------------------------------------------|------------------------------|------------------------------------------------------------------------------------------------------------------------------------------------------------------------------------------------------------|
| 5.2.1.a Do you currently smoke cigarettes?               | Yes <input type="checkbox"/> | →Specify how many per day on average <input type="text"/> <input type="text"/>                                                                                                                             |
|                                                          | No <input type="checkbox"/>  |                                                                                                                                                                                                            |
| →5.2.1.b IF <b>NO</b> , have you ever smoked cigarettes? | Yes <input type="checkbox"/> | →Date stopped <input type="text"/> |
|                                                          | No <input type="checkbox"/>  |                                                                                                                                                                                                            |

## 5.3 Substance use

*Now, I am going to ask you some questions about your experience of using substances other than those prescribed by a doctor for medical reasons. These substances can be smoked, swallowed, inhaled, injected or taken in the form of pills. Please be assured that the information on substance use will be treated as strictly confidential. We will use this information to assist us to identify any health needs you may have.*

| 5.3.1 In your lifetime, which of the following substances have you ever used other than for prescribed medical reasons? | Never                    | Once                     | More than once           |
|-------------------------------------------------------------------------------------------------------------------------|--------------------------|--------------------------|--------------------------|
| Cannabis (dagga, marijuana, hash)                                                                                       | <input type="checkbox"/> | <input type="checkbox"/> | <input type="checkbox"/> |
| Inhalants (glue, petrol, paint thinners)                                                                                | <input type="checkbox"/> | <input type="checkbox"/> | <input type="checkbox"/> |
| Cocaine (coke, crack, freebase)                                                                                         | <input type="checkbox"/> | <input type="checkbox"/> | <input type="checkbox"/> |
| Amphetamines (tik, khat, Ritalin)                                                                                       | <input type="checkbox"/> | <input type="checkbox"/> | <input type="checkbox"/> |
| Sedatives or sleeping pills (mandrax, valium, dormicum)                                                                 | <input type="checkbox"/> | <input type="checkbox"/> | <input type="checkbox"/> |
| Opiates (heroin, opium, morphine, codeine)                                                                              | <input type="checkbox"/> | <input type="checkbox"/> | <input type="checkbox"/> |
| Hallucinogens (ecstasy, LSD)                                                                                            | <input type="checkbox"/> | <input type="checkbox"/> | <input type="checkbox"/> |
| GHB (gamma hydroxyl butyrate)                                                                                           | <input type="checkbox"/> | <input type="checkbox"/> | <input type="checkbox"/> |
| Others                                                                                                                  | <input type="checkbox"/> | <input type="checkbox"/> | <input type="checkbox"/> |
| ↓ Specify _____                                                                                                         |                          |                          |                          |

**→IF NEVER to all items above skip to 5.4 Violence**

*These questions relate to your use of substances over the PAST 12 MONTHS*

|                                                                                    | <b>0</b>                 | <b>2</b>                 | <b>3</b>                 | <b>4</b>                 | <b>6</b>                     |
|------------------------------------------------------------------------------------|--------------------------|--------------------------|--------------------------|--------------------------|------------------------------|
| 5.3.2 In the past 12 months, how often have you used the substances you mentioned? | <b>Never</b>             | <b>Once or twice</b>     | <b>Monthly</b>           | <b>Weekly</b>            | <b>Daily or almost daily</b> |
| Cannabis                                                                           | <input type="checkbox"/>     |
| Inhalants                                                                          | <input type="checkbox"/>     |
| Cocaine                                                                            | <input type="checkbox"/>     |
| Amphetamines                                                                       | <input type="checkbox"/>     |
| Sedatives incl. Mandrax                                                            | <input type="checkbox"/>     |
| Opiates                                                                            | <input type="checkbox"/>     |
| Hallucinogens                                                                      | <input type="checkbox"/>     |
| GHB                                                                                | <input type="checkbox"/>     |
| Other<br>↓Specify<br>_____                                                         | <input type="checkbox"/>     |
| <b>SCORE</b>                                                                       |                          |                          |                          |                          | =                            |

→IF **NEVER** to all items above, is **0**, skip to **5.4 Violence**

↓For respondents who report substance use in PAST 12 MONTHS

|                                                                                                                                                                  | <b>0</b>                                 | <b>2</b>                                             | <b>3</b>                                   | <b>4</b>                                  | <b>6</b>                                                 |
|------------------------------------------------------------------------------------------------------------------------------------------------------------------|------------------------------------------|------------------------------------------------------|--------------------------------------------|-------------------------------------------|----------------------------------------------------------|
|                                                                                                                                                                  | <b>Never</b>                             | <b>Once a month or less</b>                          | <b>2 to 4 times a month.</b>               | <b>2 to 3 times a week.</b>               | <b>4 or more times a week.</b>                           |
| 5.3.3 Do you use more than one type of drug on the same occasion?                                                                                                | <input type="checkbox"/>                 | <input type="checkbox"/>                             | <input type="checkbox"/>                   | <input type="checkbox"/>                  | <input type="checkbox"/>                                 |
| 5.3.4 How often in the past 12 months have you had a strong desire or urge to use drugs that you found hard to resist?                                           | <b>Never</b><br><input type="checkbox"/> | <b>Less than monthly</b><br><input type="checkbox"/> | <b>Monthly</b><br><input type="checkbox"/> | <b>Weekly</b><br><input type="checkbox"/> | <b>Daily or almost daily</b><br><input type="checkbox"/> |
| 5.3.5 How often in the last 12 months has it happened that you have not been able to stop taking drugs once you started?                                         | <input type="checkbox"/>                 | <input type="checkbox"/>                             | <input type="checkbox"/>                   | <input type="checkbox"/>                  | <input type="checkbox"/>                                 |
| 5.3.6 How often in the last 12 months did you fail to do what was normally expected of you because of drug use?                                                  | <input type="checkbox"/>                 | <input type="checkbox"/>                             | <input type="checkbox"/>                   | <input type="checkbox"/>                  | <input type="checkbox"/>                                 |
| 5.3.7 How often in the last 12 months have you had to take drugs first thing in the morning to get yourself going after a heavy drug use session the day before? | <input type="checkbox"/>                 | <input type="checkbox"/>                             | <input type="checkbox"/>                   | <input type="checkbox"/>                  | <input type="checkbox"/>                                 |
| 5.3.8 How often in the past 12 months have you had a feeling of guilt or remorse after using drugs?                                                              | <input type="checkbox"/>                 | <input type="checkbox"/>                             | <input type="checkbox"/>                   | <input type="checkbox"/>                  | <input type="checkbox"/>                                 |
| <b>SCORE</b>                                                                                                                                                     |                                          |                                                      |                                            |                                           | =                                                        |

↓For respondents who report substance use in PAST 12 MONTHS

|                                                                                                                                         | Yes, during the<br>last 12 months | Yes, but not<br>in the last 12<br>months     | No                                               |
|-----------------------------------------------------------------------------------------------------------------------------------------|-----------------------------------|----------------------------------------------|--------------------------------------------------|
| 5.3.9 Have you become involved in fights while under the influence of drugs?                                                            | <input type="checkbox"/>          | <input type="checkbox"/>                     | <input type="checkbox"/>                         |
| 5.3.10 Have you engaged in sex for money, goods or drugs in order to obtain drugs?                                                      | <input type="checkbox"/>          | <input type="checkbox"/>                     | <input type="checkbox"/>                         |
| 5.3.11 Have you engaged in illegal activities in order to obtain drugs?                                                                 | <input type="checkbox"/>          | <input type="checkbox"/>                     | <input type="checkbox"/>                         |
| 5.3.12 Have you been arrested for possession of illegal drugs?                                                                          | <input type="checkbox"/>          | <input type="checkbox"/>                     | <input type="checkbox"/>                         |
| 5.3.13 Have you ever had blackouts or flashbacks as a result of using drugs?                                                            | <input type="checkbox"/>          | <input type="checkbox"/>                     | <input type="checkbox"/>                         |
| 5.3.14 Have you ever experienced withdrawal symptoms (felt sick) when you stopped taking drugs?                                         | <input type="checkbox"/>          | <input type="checkbox"/>                     | <input type="checkbox"/>                         |
| 5.3.15 Have you ever had medical problems as a result of your drug use (e.g. memory loss, fits, bleeding or hepatitis)?                 | <input type="checkbox"/>          | <input type="checkbox"/>                     | <input type="checkbox"/>                         |
| 5.3.16 Have you or someone else been mentally or physically hurt because you used drugs?                                                | <input type="checkbox"/>          | <input type="checkbox"/>                     | <input type="checkbox"/>                         |
| 5.3.17 Has a relative, friend, doctor or other health care worker been concerned about your drug use or suggested that you should stop? | <input type="checkbox"/>          | <input type="checkbox"/>                     | <input type="checkbox"/>                         |
| 5.3.18.a Have you ever injected drugs?                                                                                                  | <input type="checkbox"/>          | <input type="checkbox"/>                     | <input type="checkbox"/>                         |
| →5.3.18.b IF <b>YES</b> , how often did you inject drugs in the past 12 months?                                                         |                                   | Once weekly or less <input type="checkbox"/> | More than once per week <input type="checkbox"/> |

#### 5.4 Violence

*You are doing really well and we are about half-way of the way through the interview. The information you have given us is very important.*

*There are now a few more questions about your experiences growing up, and your relationships with others. Some men find these questions hard to talk about, others find it easy. Remember that everything you share here will only be used for research purposes and will be kept strictly secret. We have not written down your name anywhere and what you say in this interview cannot be linked to you in any way, but it **WILL** help us a lot in understanding the lives of men in South Africa.*

|                                                                                                                                                                   | <b>Never</b>             | <b>Once</b>              | <b>More than once</b>    |
|-------------------------------------------------------------------------------------------------------------------------------------------------------------------|--------------------------|--------------------------|--------------------------|
| 5.4.1 While you were growing up, how often did someone in your household push, grab, shove, throw something, slap, hit, kick or punch you?                        | <input type="checkbox"/> | <input type="checkbox"/> | <input type="checkbox"/> |
| 5.4.2 While you were growing up, how often did your parents or the people who raised you push, grab, shove, throw something, slap, hit, kick or punch each other? | <input type="checkbox"/> | <input type="checkbox"/> | <input type="checkbox"/> |

→Go to 6. SEXUAL BEHAVIOUR AND PRACTICES

## 6. SEXUAL BEHAVIOUR AND PRACTICES

*I'd now like to ask you about your sexual partners and practices. While some of this information may be embarrassing or difficult to remember, please try and answer as truthfully as you can.*

6.1.1 Have you ever had sexual intercourse? Yes ☐ No ☐

*(By this I mean penetrative sex where the penis enters the vagina, anus or mouth)*

**→IF NO, participant is not eligible**

6.1.2 At what age did you first have sex? Years

6.1.3 The first time you had sex, were you forced? Yes ☐ No ☐

6.1.4 How many sexual partners have you had in your lifetime?  partners

**→IF 0 partners participant is not eligible**

6.1.5.a How many sexual partners have you had in the past 3 months?  partners

**→IF 0 partners participant is not eligible**

**→6.1.5.b IF >1 partner, did you have a relationship with more than one person at the same time during the last 3 months?** Yes ☐ No ☐

6.1.6.a Some men have sex with other men. Have you ever had sex with another man? Yes ☐ No ☐

**→6.1.6.b IF YES, at what age did you first have sex with another man?** Years

**→6.1.6.c The first time you had sex with a man did you have sex against your will?** Yes ☐ No ☐

6.1.7 How do you identify yourself?

Heterosexual/Straight ☐

Bisexual ☐

Homosexual/Gay ☐

Other ☐

**→ Specify** \_\_\_\_\_

Thanks for answering those. The information you have given us is very important. There are now a few more questions about things you may **have done with women** whether they were partners or girlfriends or other women. These next questions are asking about the whole of your life, including when you were a boy. Please feel free in answering these questions, we really want to learn more about things men do. Remember that what your answer here cannot be linked to you in any way.

|                                                                                                                      | Never                    | Once                     | More than once           |
|----------------------------------------------------------------------------------------------------------------------|--------------------------|--------------------------|--------------------------|
| 6.1.8 How many times have you slept with a woman or girl when she didn't consent to sex or after you forced her?     | <input type="checkbox"/> | <input type="checkbox"/> | <input type="checkbox"/> |
| 6.1.9 How many times have you slept with a woman or girl when she was too drunk to say whether she wanted it or not? | <input type="checkbox"/> | <input type="checkbox"/> | <input type="checkbox"/> |
| 6.1.10 Have you ever done anything sexual with a boy or man when he didn't consent or you forced him?                | <input type="checkbox"/> | <input type="checkbox"/> | <input type="checkbox"/> |
| 6.1.11 Have you ever had sex with someone because they threatened you?                                               | <input type="checkbox"/> | <input type="checkbox"/> | <input type="checkbox"/> |

## 6.2 Partners

I'd like to know more about your most recent sexual partner in the last 3 months up to a maximum of 3 partners **as indicated in Question 6.15a** starting with your most recent sexual partner.

For these questions, sex is defined as any vaginal or anal sex that is where a man inserts his penis into the vagina or anus. A sexual partner is someone with whom you have had sex either regularly or only once.

### 6.2.1 Most recent partner

|                                                                                                                                                                                                                                                                                |                                                                                                                               |
|--------------------------------------------------------------------------------------------------------------------------------------------------------------------------------------------------------------------------------------------------------------------------------|-------------------------------------------------------------------------------------------------------------------------------|
| 6.2.1.a How old is this person?                                                                                                                                                                                                                                                | Years <input type="text"/> <input type="text"/>                                                                               |
| 6.2.1.b Is this person male or female?                                                                                                                                                                                                                                         | Female <input type="checkbox"/> Male <input type="checkbox"/>                                                                 |
| 6.2.1.c How would you characterise your relationship with this person?                                                                                                                                                                                                         | Main partner <input type="checkbox"/> Regular partner <input type="checkbox"/><br>Occasional partner <input type="checkbox"/> |
| <p><b>Main partner</b> = person you regularly have sex with<br/>AND married to/living with</p> <p><b>Regular partner</b> = person you regularly have sex with but not married/not living together</p> <p><b>Occasional partner</b> = person you had sex with once or twice</p> |                                                                                                                               |

| 6.2.1.d Is this person a new partner, i.e. someone that you had sex with for the first time in the past 3 months?                               | Yes <input type="checkbox"/>                                                                                                                                                                                                                                                                                                                                                                                                                                                                                                                                                                                                                                                                                                                                                                                                                                                                                                                                                                                                                                                                                                                                                                                                                                                                                                                                             | No <input type="checkbox"/>                                                                                         |             |     |    |                                        |                          |                          |                                         |                          |                          |                                  |                          |                          |                                                                |                          |                          |                                                                       |                          |                          |                                         |                          |                          |                                         |                          |                          |                                           |                          |                          |                                            |                          |                          |
|-------------------------------------------------------------------------------------------------------------------------------------------------|--------------------------------------------------------------------------------------------------------------------------------------------------------------------------------------------------------------------------------------------------------------------------------------------------------------------------------------------------------------------------------------------------------------------------------------------------------------------------------------------------------------------------------------------------------------------------------------------------------------------------------------------------------------------------------------------------------------------------------------------------------------------------------------------------------------------------------------------------------------------------------------------------------------------------------------------------------------------------------------------------------------------------------------------------------------------------------------------------------------------------------------------------------------------------------------------------------------------------------------------------------------------------------------------------------------------------------------------------------------------------|---------------------------------------------------------------------------------------------------------------------|-------------|-----|----|----------------------------------------|--------------------------|--------------------------|-----------------------------------------|--------------------------|--------------------------|----------------------------------|--------------------------|--------------------------|----------------------------------------------------------------|--------------------------|--------------------------|-----------------------------------------------------------------------|--------------------------|--------------------------|-----------------------------------------|--------------------------|--------------------------|-----------------------------------------|--------------------------|--------------------------|-------------------------------------------|--------------------------|--------------------------|--------------------------------------------|--------------------------|--------------------------|
| 6.2.1.e Is this partner a recent immigrant to South Africa (i.e. arrived within the last 3 years)?                                              | Yes <input type="checkbox"/><br>Don't know <input type="checkbox"/>                                                                                                                                                                                                                                                                                                                                                                                                                                                                                                                                                                                                                                                                                                                                                                                                                                                                                                                                                                                                                                                                                                                                                                                                                                                                                                      | No <input type="checkbox"/>                                                                                         |             |     |    |                                        |                          |                          |                                         |                          |                          |                                  |                          |                          |                                                                |                          |                          |                                                                       |                          |                          |                                         |                          |                          |                                         |                          |                          |                                           |                          |                          |                                            |                          |                          |
| 6.2.1.f Has this person ever tested positive for HIV?                                                                                           | Yes <input type="checkbox"/><br>Don't know <input type="checkbox"/>                                                                                                                                                                                                                                                                                                                                                                                                                                                                                                                                                                                                                                                                                                                                                                                                                                                                                                                                                                                                                                                                                                                                                                                                                                                                                                      | No <input type="checkbox"/>                                                                                         |             |     |    |                                        |                          |                          |                                         |                          |                          |                                  |                          |                          |                                                                |                          |                          |                                                                       |                          |                          |                                         |                          |                          |                                         |                          |                          |                                           |                          |                          |                                            |                          |                          |
| 6.2.1.g How long did you know this person before you first had sex with them?                                                                   | Minutes <input type="checkbox"/> <input type="checkbox"/><br>Hours <input type="checkbox"/> <input type="checkbox"/><br>Weeks <input type="checkbox"/> <input type="checkbox"/>                                                                                                                                                                                                                                                                                                                                                                                                                                                                                                                                                                                                                                                                                                                                                                                                                                                                                                                                                                                                                                                                                                                                                                                          | Months <input type="checkbox"/> <input type="checkbox"/><br>Years <input type="checkbox"/> <input type="checkbox"/> |             |     |    |                                        |                          |                          |                                         |                          |                          |                                  |                          |                          |                                                                |                          |                          |                                                                       |                          |                          |                                         |                          |                          |                                         |                          |                          |                                           |                          |                          |                                            |                          |                          |
| 6.2.1.h During the last 3 months, how many times did you have sex with this partner?                                                            | No. of times <input type="checkbox"/> <input type="checkbox"/> <input type="checkbox"/>                                                                                                                                                                                                                                                                                                                                                                                                                                                                                                                                                                                                                                                                                                                                                                                                                                                                                                                                                                                                                                                                                                                                                                                                                                                                                  |                                                                                                                     |             |     |    |                                        |                          |                          |                                         |                          |                          |                                  |                          |                          |                                                                |                          |                          |                                                                       |                          |                          |                                         |                          |                          |                                         |                          |                          |                                           |                          |                          |                                            |                          |                          |
| 6.2.1.i How often did you use a condom when you had sex?                                                                                        | Always <input type="checkbox"/><br>>/= to half the time <input type="checkbox"/>                                                                                                                                                                                                                                                                                                                                                                                                                                                                                                                                                                                                                                                                                                                                                                                                                                                                                                                                                                                                                                                                                                                                                                                                                                                                                         | < half the time <input type="checkbox"/><br>Never <input type="checkbox"/>                                          |             |     |    |                                        |                          |                          |                                         |                          |                          |                                  |                          |                          |                                                                |                          |                          |                                                                       |                          |                          |                                         |                          |                          |                                         |                          |                          |                                           |                          |                          |                                            |                          |                          |
| 6.2.1.j Did you drink alcohol the last time that you had sex with this partner (either during sex or up to two hours before you had sex)?       | Yes <input type="checkbox"/>                                                                                                                                                                                                                                                                                                                                                                                                                                                                                                                                                                                                                                                                                                                                                                                                                                                                                                                                                                                                                                                                                                                                                                                                                                                                                                                                             | No <input type="checkbox"/>                                                                                         |             |     |    |                                        |                          |                          |                                         |                          |                          |                                  |                          |                          |                                                                |                          |                          |                                                                       |                          |                          |                                         |                          |                          |                                         |                          |                          |                                           |                          |                          |                                            |                          |                          |
| 6.2.1.k Did this partner give you or receive from you money, drugs, food or a place to stay in exchange for sex the last time that you had sex? | Yes <input type="checkbox"/>                                                                                                                                                                                                                                                                                                                                                                                                                                                                                                                                                                                                                                                                                                                                                                                                                                                                                                                                                                                                                                                                                                                                                                                                                                                                                                                                             | No <input type="checkbox"/>                                                                                         |             |     |    |                                        |                          |                          |                                         |                          |                          |                                  |                          |                          |                                                                |                          |                          |                                                                       |                          |                          |                                         |                          |                          |                                         |                          |                          |                                           |                          |                          |                                            |                          |                          |
| 6.2.1.l What type of sex did you have with this person?                                                                                         | <table border="0"> <thead> <tr> <th>Type of sex</th> <th>Yes</th> <th>No</th> </tr> </thead> <tbody> <tr> <td>Oral received <input type="checkbox"/></td> <td><input type="checkbox"/></td> <td><input type="checkbox"/></td> </tr> <tr> <td>Oral performed <input type="checkbox"/></td> <td><input type="checkbox"/></td> <td><input type="checkbox"/></td> </tr> <tr> <td>Vaginal <input type="checkbox"/></td> <td><input type="checkbox"/></td> <td><input type="checkbox"/></td> </tr> <tr> <td>Receptive insertion of digits in anus <input type="checkbox"/></td> <td><input type="checkbox"/></td> <td><input type="checkbox"/></td> </tr> <tr> <td>Receptive insertion of other objects in anus <input type="checkbox"/></td> <td><input type="checkbox"/></td> <td><input type="checkbox"/></td> </tr> <tr> <td>Anal receptive <input type="checkbox"/></td> <td><input type="checkbox"/></td> <td><input type="checkbox"/></td> </tr> <tr> <td>Anal insertive <input type="checkbox"/></td> <td><input type="checkbox"/></td> <td><input type="checkbox"/></td> </tr> <tr> <td>Rimming received <input type="checkbox"/></td> <td><input type="checkbox"/></td> <td><input type="checkbox"/></td> </tr> <tr> <td>Rimming performed <input type="checkbox"/></td> <td><input type="checkbox"/></td> <td><input type="checkbox"/></td> </tr> </tbody> </table> |                                                                                                                     | Type of sex | Yes | No | Oral received <input type="checkbox"/> | <input type="checkbox"/> | <input type="checkbox"/> | Oral performed <input type="checkbox"/> | <input type="checkbox"/> | <input type="checkbox"/> | Vaginal <input type="checkbox"/> | <input type="checkbox"/> | <input type="checkbox"/> | Receptive insertion of digits in anus <input type="checkbox"/> | <input type="checkbox"/> | <input type="checkbox"/> | Receptive insertion of other objects in anus <input type="checkbox"/> | <input type="checkbox"/> | <input type="checkbox"/> | Anal receptive <input type="checkbox"/> | <input type="checkbox"/> | <input type="checkbox"/> | Anal insertive <input type="checkbox"/> | <input type="checkbox"/> | <input type="checkbox"/> | Rimming received <input type="checkbox"/> | <input type="checkbox"/> | <input type="checkbox"/> | Rimming performed <input type="checkbox"/> | <input type="checkbox"/> | <input type="checkbox"/> |
| Type of sex                                                                                                                                     | Yes                                                                                                                                                                                                                                                                                                                                                                                                                                                                                                                                                                                                                                                                                                                                                                                                                                                                                                                                                                                                                                                                                                                                                                                                                                                                                                                                                                      | No                                                                                                                  |             |     |    |                                        |                          |                          |                                         |                          |                          |                                  |                          |                          |                                                                |                          |                          |                                                                       |                          |                          |                                         |                          |                          |                                         |                          |                          |                                           |                          |                          |                                            |                          |                          |
| Oral received <input type="checkbox"/>                                                                                                          | <input type="checkbox"/>                                                                                                                                                                                                                                                                                                                                                                                                                                                                                                                                                                                                                                                                                                                                                                                                                                                                                                                                                                                                                                                                                                                                                                                                                                                                                                                                                 | <input type="checkbox"/>                                                                                            |             |     |    |                                        |                          |                          |                                         |                          |                          |                                  |                          |                          |                                                                |                          |                          |                                                                       |                          |                          |                                         |                          |                          |                                         |                          |                          |                                           |                          |                          |                                            |                          |                          |
| Oral performed <input type="checkbox"/>                                                                                                         | <input type="checkbox"/>                                                                                                                                                                                                                                                                                                                                                                                                                                                                                                                                                                                                                                                                                                                                                                                                                                                                                                                                                                                                                                                                                                                                                                                                                                                                                                                                                 | <input type="checkbox"/>                                                                                            |             |     |    |                                        |                          |                          |                                         |                          |                          |                                  |                          |                          |                                                                |                          |                          |                                                                       |                          |                          |                                         |                          |                          |                                         |                          |                          |                                           |                          |                          |                                            |                          |                          |
| Vaginal <input type="checkbox"/>                                                                                                                | <input type="checkbox"/>                                                                                                                                                                                                                                                                                                                                                                                                                                                                                                                                                                                                                                                                                                                                                                                                                                                                                                                                                                                                                                                                                                                                                                                                                                                                                                                                                 | <input type="checkbox"/>                                                                                            |             |     |    |                                        |                          |                          |                                         |                          |                          |                                  |                          |                          |                                                                |                          |                          |                                                                       |                          |                          |                                         |                          |                          |                                         |                          |                          |                                           |                          |                          |                                            |                          |                          |
| Receptive insertion of digits in anus <input type="checkbox"/>                                                                                  | <input type="checkbox"/>                                                                                                                                                                                                                                                                                                                                                                                                                                                                                                                                                                                                                                                                                                                                                                                                                                                                                                                                                                                                                                                                                                                                                                                                                                                                                                                                                 | <input type="checkbox"/>                                                                                            |             |     |    |                                        |                          |                          |                                         |                          |                          |                                  |                          |                          |                                                                |                          |                          |                                                                       |                          |                          |                                         |                          |                          |                                         |                          |                          |                                           |                          |                          |                                            |                          |                          |
| Receptive insertion of other objects in anus <input type="checkbox"/>                                                                           | <input type="checkbox"/>                                                                                                                                                                                                                                                                                                                                                                                                                                                                                                                                                                                                                                                                                                                                                                                                                                                                                                                                                                                                                                                                                                                                                                                                                                                                                                                                                 | <input type="checkbox"/>                                                                                            |             |     |    |                                        |                          |                          |                                         |                          |                          |                                  |                          |                          |                                                                |                          |                          |                                                                       |                          |                          |                                         |                          |                          |                                         |                          |                          |                                           |                          |                          |                                            |                          |                          |
| Anal receptive <input type="checkbox"/>                                                                                                         | <input type="checkbox"/>                                                                                                                                                                                                                                                                                                                                                                                                                                                                                                                                                                                                                                                                                                                                                                                                                                                                                                                                                                                                                                                                                                                                                                                                                                                                                                                                                 | <input type="checkbox"/>                                                                                            |             |     |    |                                        |                          |                          |                                         |                          |                          |                                  |                          |                          |                                                                |                          |                          |                                                                       |                          |                          |                                         |                          |                          |                                         |                          |                          |                                           |                          |                          |                                            |                          |                          |
| Anal insertive <input type="checkbox"/>                                                                                                         | <input type="checkbox"/>                                                                                                                                                                                                                                                                                                                                                                                                                                                                                                                                                                                                                                                                                                                                                                                                                                                                                                                                                                                                                                                                                                                                                                                                                                                                                                                                                 | <input type="checkbox"/>                                                                                            |             |     |    |                                        |                          |                          |                                         |                          |                          |                                  |                          |                          |                                                                |                          |                          |                                                                       |                          |                          |                                         |                          |                          |                                         |                          |                          |                                           |                          |                          |                                            |                          |                          |
| Rimming received <input type="checkbox"/>                                                                                                       | <input type="checkbox"/>                                                                                                                                                                                                                                                                                                                                                                                                                                                                                                                                                                                                                                                                                                                                                                                                                                                                                                                                                                                                                                                                                                                                                                                                                                                                                                                                                 | <input type="checkbox"/>                                                                                            |             |     |    |                                        |                          |                          |                                         |                          |                          |                                  |                          |                          |                                                                |                          |                          |                                                                       |                          |                          |                                         |                          |                          |                                         |                          |                          |                                           |                          |                          |                                            |                          |                          |
| Rimming performed <input type="checkbox"/>                                                                                                      | <input type="checkbox"/>                                                                                                                                                                                                                                                                                                                                                                                                                                                                                                                                                                                                                                                                                                                                                                                                                                                                                                                                                                                                                                                                                                                                                                                                                                                                                                                                                 | <input type="checkbox"/>                                                                                            |             |     |    |                                        |                          |                          |                                         |                          |                          |                                  |                          |                          |                                                                |                          |                          |                                                                       |                          |                          |                                         |                          |                          |                                         |                          |                          |                                           |                          |                          |                                            |                          |                          |
| → <b>MULTIPLE RESPONSES</b><br>possible                                                                                                         |                                                                                                                                                                                                                                                                                                                                                                                                                                                                                                                                                                                                                                                                                                                                                                                                                                                                                                                                                                                                                                                                                                                                                                                                                                                                                                                                                                          |                                                                                                                     |             |     |    |                                        |                          |                          |                                         |                          |                          |                                  |                          |                          |                                                                |                          |                          |                                                                       |                          |                          |                                         |                          |                          |                                         |                          |                          |                                           |                          |                          |                                            |                          |                          |
| 6.2.1.m Do you know or suspect that this person has other sexual partners?                                                                      | Yes <input type="checkbox"/>                                                                                                                                                                                                                                                                                                                                                                                                                                                                                                                                                                                                                                                                                                                                                                                                                                                                                                                                                                                                                                                                                                                                                                                                                                                                                                                                             | No <input type="checkbox"/>                                                                                         |             |     |    |                                        |                          |                          |                                         |                          |                          |                                  |                          |                          |                                                                |                          |                          |                                                                       |                          |                          |                                         |                          |                          |                                         |                          |                          |                                           |                          |                          |                                            |                          |                          |

|                                                                                                                                                                                                                                                                            |                                                                                                                                                         |                                                                                                     |
|----------------------------------------------------------------------------------------------------------------------------------------------------------------------------------------------------------------------------------------------------------------------------|---------------------------------------------------------------------------------------------------------------------------------------------------------|-----------------------------------------------------------------------------------------------------|
|                                                                                                                                                                                                                                                                            |                                                                                                                                                         |                                                                                                     |
| <b>6.2.2 Second most recent partner in past 3 months</b>                                                                                                                                                                                                                   |                                                                                                                                                         |                                                                                                     |
| 6.2.2.a How old is this person?                                                                                                                                                                                                                                            | Years <input type="text"/> <input type="text"/>                                                                                                         |                                                                                                     |
| 6.2.2.b Is this person male or female?                                                                                                                                                                                                                                     | Female <input type="checkbox"/>                                                                                                                         | Male <input type="checkbox"/>                                                                       |
| 6.2.2.c How would you characterise your relationship with this person?                                                                                                                                                                                                     | Main partner <input type="checkbox"/><br>Occasional partner <input type="checkbox"/>                                                                    | Regular partner <input type="checkbox"/>                                                            |
| <p><b>Main partner</b> = person you regularly have sex with AND married to/living with</p> <p><b>Regular partner</b> = person you regularly have sex with but not married/not living together</p> <p><b>Occasional partner</b> = person you had sex with once or twice</p> |                                                                                                                                                         |                                                                                                     |
| 6.2.2.d Is this person a new partner, i.e. someone that you had sex with for the first time in the past 3 months?                                                                                                                                                          | Yes <input type="checkbox"/>                                                                                                                            | No <input type="checkbox"/>                                                                         |
| 6.2.2.e Is this partner a recent immigrant to South Africa (i.e. arrived within the last 3 years)?                                                                                                                                                                         | Yes <input type="checkbox"/><br>Don't know <input type="checkbox"/>                                                                                     | No <input type="checkbox"/>                                                                         |
| 6.2.2.f Has this person ever tested positive for HIV?                                                                                                                                                                                                                      | Yes <input type="checkbox"/><br>Don't know <input type="checkbox"/>                                                                                     | No <input type="checkbox"/>                                                                         |
| 6.2.2.g How long did you know this person before you first had sex with them?                                                                                                                                                                                              | Minutes <input type="text"/> <input type="text"/><br>Hours <input type="text"/> <input type="text"/><br>Weeks <input type="text"/> <input type="text"/> | Months <input type="text"/> <input type="text"/><br>Years <input type="text"/> <input type="text"/> |
| 6.2.2.h During the last 3 months, how many times did you have sex with this partner?                                                                                                                                                                                       | No. of times <input type="text"/> <input type="text"/>                                                                                                  |                                                                                                     |
| 6.2.2.i How often did you use a condom when you had sex?                                                                                                                                                                                                                   | Always <input type="checkbox"/><br>>/= to half the time <input type="checkbox"/>                                                                        | < half the time <input type="checkbox"/><br>Never <input type="checkbox"/>                          |
| 6.2.2.j Did you drink alcohol the last time that you had sex with this partner – either during sex or up to two hours before you had sex?                                                                                                                                  | Yes <input type="checkbox"/>                                                                                                                            | No <input type="checkbox"/>                                                                         |

|                                                                                                                                                                                                                                                                                                                                                   |                                                                                                                                                                                                                                                                                                                                                                                                                                                                                                                                                                                                                                                                                                                  |                                          |             |     |    |               |                          |                          |                |                          |                          |         |                          |                          |                |                          |                          |                |                          |                          |
|---------------------------------------------------------------------------------------------------------------------------------------------------------------------------------------------------------------------------------------------------------------------------------------------------------------------------------------------------|------------------------------------------------------------------------------------------------------------------------------------------------------------------------------------------------------------------------------------------------------------------------------------------------------------------------------------------------------------------------------------------------------------------------------------------------------------------------------------------------------------------------------------------------------------------------------------------------------------------------------------------------------------------------------------------------------------------|------------------------------------------|-------------|-----|----|---------------|--------------------------|--------------------------|----------------|--------------------------|--------------------------|---------|--------------------------|--------------------------|----------------|--------------------------|--------------------------|----------------|--------------------------|--------------------------|
| 6.2.2.k Did this partner give you or receive from you money, drugs, food or a place to stay in exchange for sex the last time that you had sex?                                                                                                                                                                                                   | Yes <input type="checkbox"/>                                                                                                                                                                                                                                                                                                                                                                                                                                                                                                                                                                                                                                                                                     | No <input type="checkbox"/>              |             |     |    |               |                          |                          |                |                          |                          |         |                          |                          |                |                          |                          |                |                          |                          |
| 6.2.2.l What type of sex did you have with this person?<br><br>→ <b>MULTIPLE RESPONSES</b> possible                                                                                                                                                                                                                                               | <table style="width: 100%; border-collapse: collapse;"> <tr> <td style="width: 40%;">Type of sex</td> <td style="width: 10%;">Yes</td> <td style="width: 10%;">No</td> </tr> <tr> <td>Oral received</td> <td><input type="checkbox"/></td> <td><input type="checkbox"/></td> </tr> <tr> <td>Oral performed</td> <td><input type="checkbox"/></td> <td><input type="checkbox"/></td> </tr> <tr> <td>Vaginal</td> <td><input type="checkbox"/></td> <td><input type="checkbox"/></td> </tr> <tr> <td>Anal receptive</td> <td><input type="checkbox"/></td> <td><input type="checkbox"/></td> </tr> <tr> <td>Anal insertive</td> <td><input type="checkbox"/></td> <td><input type="checkbox"/></td> </tr> </table> |                                          | Type of sex | Yes | No | Oral received | <input type="checkbox"/> | <input type="checkbox"/> | Oral performed | <input type="checkbox"/> | <input type="checkbox"/> | Vaginal | <input type="checkbox"/> | <input type="checkbox"/> | Anal receptive | <input type="checkbox"/> | <input type="checkbox"/> | Anal insertive | <input type="checkbox"/> | <input type="checkbox"/> |
| Type of sex                                                                                                                                                                                                                                                                                                                                       | Yes                                                                                                                                                                                                                                                                                                                                                                                                                                                                                                                                                                                                                                                                                                              | No                                       |             |     |    |               |                          |                          |                |                          |                          |         |                          |                          |                |                          |                          |                |                          |                          |
| Oral received                                                                                                                                                                                                                                                                                                                                     | <input type="checkbox"/>                                                                                                                                                                                                                                                                                                                                                                                                                                                                                                                                                                                                                                                                                         | <input type="checkbox"/>                 |             |     |    |               |                          |                          |                |                          |                          |         |                          |                          |                |                          |                          |                |                          |                          |
| Oral performed                                                                                                                                                                                                                                                                                                                                    | <input type="checkbox"/>                                                                                                                                                                                                                                                                                                                                                                                                                                                                                                                                                                                                                                                                                         | <input type="checkbox"/>                 |             |     |    |               |                          |                          |                |                          |                          |         |                          |                          |                |                          |                          |                |                          |                          |
| Vaginal                                                                                                                                                                                                                                                                                                                                           | <input type="checkbox"/>                                                                                                                                                                                                                                                                                                                                                                                                                                                                                                                                                                                                                                                                                         | <input type="checkbox"/>                 |             |     |    |               |                          |                          |                |                          |                          |         |                          |                          |                |                          |                          |                |                          |                          |
| Anal receptive                                                                                                                                                                                                                                                                                                                                    | <input type="checkbox"/>                                                                                                                                                                                                                                                                                                                                                                                                                                                                                                                                                                                                                                                                                         | <input type="checkbox"/>                 |             |     |    |               |                          |                          |                |                          |                          |         |                          |                          |                |                          |                          |                |                          |                          |
| Anal insertive                                                                                                                                                                                                                                                                                                                                    | <input type="checkbox"/>                                                                                                                                                                                                                                                                                                                                                                                                                                                                                                                                                                                                                                                                                         | <input type="checkbox"/>                 |             |     |    |               |                          |                          |                |                          |                          |         |                          |                          |                |                          |                          |                |                          |                          |
| 6.2.2.m Do you know or suspect that this person has other sexual partners?                                                                                                                                                                                                                                                                        | Yes <input type="checkbox"/>                                                                                                                                                                                                                                                                                                                                                                                                                                                                                                                                                                                                                                                                                     | No <input type="checkbox"/>              |             |     |    |               |                          |                          |                |                          |                          |         |                          |                          |                |                          |                          |                |                          |                          |
|                                                                                                                                                                                                                                                                                                                                                   |                                                                                                                                                                                                                                                                                                                                                                                                                                                                                                                                                                                                                                                                                                                  |                                          |             |     |    |               |                          |                          |                |                          |                          |         |                          |                          |                |                          |                          |                |                          |                          |
| <b>6.2.3 Third most recent partner in past 3 months</b>                                                                                                                                                                                                                                                                                           |                                                                                                                                                                                                                                                                                                                                                                                                                                                                                                                                                                                                                                                                                                                  |                                          |             |     |    |               |                          |                          |                |                          |                          |         |                          |                          |                |                          |                          |                |                          |                          |
| 6.2.3.a How old is this person?                                                                                                                                                                                                                                                                                                                   | Years <input type="text"/> <input type="text"/>                                                                                                                                                                                                                                                                                                                                                                                                                                                                                                                                                                                                                                                                  |                                          |             |     |    |               |                          |                          |                |                          |                          |         |                          |                          |                |                          |                          |                |                          |                          |
| 6.2.3.b Is this person male or female?                                                                                                                                                                                                                                                                                                            | Female <input type="checkbox"/>                                                                                                                                                                                                                                                                                                                                                                                                                                                                                                                                                                                                                                                                                  | Male <input type="checkbox"/>            |             |     |    |               |                          |                          |                |                          |                          |         |                          |                          |                |                          |                          |                |                          |                          |
|                                                                                                                                                                                                                                                                                                                                                   |                                                                                                                                                                                                                                                                                                                                                                                                                                                                                                                                                                                                                                                                                                                  |                                          |             |     |    |               |                          |                          |                |                          |                          |         |                          |                          |                |                          |                          |                |                          |                          |
| 6.2.3.c How would you characterise your relationship with this person?<br><br><b>Main partner</b> = person you regularly have sex with AND married to/living with<br><br><b>Regular partner</b> = person you regularly have sex with but not married/not living together<br><br><b>Occasional partner</b> = person you had sex with once or twice | Main partner <input type="checkbox"/><br><br>Occasional partner <input type="checkbox"/>                                                                                                                                                                                                                                                                                                                                                                                                                                                                                                                                                                                                                         | Regular partner <input type="checkbox"/> |             |     |    |               |                          |                          |                |                          |                          |         |                          |                          |                |                          |                          |                |                          |                          |
| 6.2.3.d Is this person a new partner, i.e. someone that you had sex with for the first time in the past 3 months?                                                                                                                                                                                                                                 | Yes <input type="checkbox"/>                                                                                                                                                                                                                                                                                                                                                                                                                                                                                                                                                                                                                                                                                     | No <input type="checkbox"/>              |             |     |    |               |                          |                          |                |                          |                          |         |                          |                          |                |                          |                          |                |                          |                          |
| 6.2.3.e Is this partner a recent immigrant to South Africa (i.e. arrived within the last 3 years)?                                                                                                                                                                                                                                                | Yes <input type="checkbox"/><br><br>Don't know <input type="checkbox"/>                                                                                                                                                                                                                                                                                                                                                                                                                                                                                                                                                                                                                                          | No <input type="checkbox"/>              |             |     |    |               |                          |                          |                |                          |                          |         |                          |                          |                |                          |                          |                |                          |                          |
| 6.2.3.f Has this person ever tested positive for HIV?                                                                                                                                                                                                                                                                                             | Yes <input type="checkbox"/>                                                                                                                                                                                                                                                                                                                                                                                                                                                                                                                                                                                                                                                                                     | No <input type="checkbox"/>              |             |     |    |               |                          |                          |                |                          |                          |         |                          |                          |                |                          |                          |                |                          |                          |

|                                                                                                                                                 |                                                                                                                                                                                                                                                                                                                                                                                                                                                                                                                                                                                                                 |                                                                                                                     |             |     |    |               |                          |                          |                |                          |                          |                |                          |                          |                |                          |                          |         |                          |                          |
|-------------------------------------------------------------------------------------------------------------------------------------------------|-----------------------------------------------------------------------------------------------------------------------------------------------------------------------------------------------------------------------------------------------------------------------------------------------------------------------------------------------------------------------------------------------------------------------------------------------------------------------------------------------------------------------------------------------------------------------------------------------------------------|---------------------------------------------------------------------------------------------------------------------|-------------|-----|----|---------------|--------------------------|--------------------------|----------------|--------------------------|--------------------------|----------------|--------------------------|--------------------------|----------------|--------------------------|--------------------------|---------|--------------------------|--------------------------|
| Don't know <input type="checkbox"/>                                                                                                             |                                                                                                                                                                                                                                                                                                                                                                                                                                                                                                                                                                                                                 |                                                                                                                     |             |     |    |               |                          |                          |                |                          |                          |                |                          |                          |                |                          |                          |         |                          |                          |
| 6.2.3.g How long did you know this person before you first had sex with them?                                                                   | Minutes <input type="checkbox"/> <input type="checkbox"/><br>Hours <input type="checkbox"/> <input type="checkbox"/><br>Weeks <input type="checkbox"/> <input type="checkbox"/>                                                                                                                                                                                                                                                                                                                                                                                                                                 | Months <input type="checkbox"/> <input type="checkbox"/><br>Years <input type="checkbox"/> <input type="checkbox"/> |             |     |    |               |                          |                          |                |                          |                          |                |                          |                          |                |                          |                          |         |                          |                          |
| 6.2.3.h During the last 3 months, how many times did you have sex with this partner?                                                            | No. of times <input type="checkbox"/> <input type="checkbox"/>                                                                                                                                                                                                                                                                                                                                                                                                                                                                                                                                                  |                                                                                                                     |             |     |    |               |                          |                          |                |                          |                          |                |                          |                          |                |                          |                          |         |                          |                          |
| 6.2.3.i How often did you use a condom when you had sex?                                                                                        | Always <input type="checkbox"/><br>>/= to half the time <input type="checkbox"/>                                                                                                                                                                                                                                                                                                                                                                                                                                                                                                                                | < half the time <input type="checkbox"/><br>Never <input type="checkbox"/>                                          |             |     |    |               |                          |                          |                |                          |                          |                |                          |                          |                |                          |                          |         |                          |                          |
| 6.2.3.j Did you drink alcohol the last time that you had sex with this partner – either during sex or up to two hours before you had sex?       | Yes <input type="checkbox"/>                                                                                                                                                                                                                                                                                                                                                                                                                                                                                                                                                                                    | No <input type="checkbox"/>                                                                                         |             |     |    |               |                          |                          |                |                          |                          |                |                          |                          |                |                          |                          |         |                          |                          |
| 6.2.3.k Did this partner give you or receive from you money, drugs, food or a place to stay in exchange for sex the last time that you had sex? | Yes <input type="checkbox"/>                                                                                                                                                                                                                                                                                                                                                                                                                                                                                                                                                                                    | No <input type="checkbox"/>                                                                                         |             |     |    |               |                          |                          |                |                          |                          |                |                          |                          |                |                          |                          |         |                          |                          |
| 6.2.3.l What type of sex did you have with this person?<br><br>→ <b>MULTIPLE RESPONSES</b> possible                                             | <table border="0"> <tr> <td>Type of sex</td> <td>Yes</td> <td>No</td> </tr> <tr> <td>Oral received</td> <td><input type="checkbox"/></td> <td><input type="checkbox"/></td> </tr> <tr> <td>Oral performed</td> <td><input type="checkbox"/></td> <td><input type="checkbox"/></td> </tr> <tr> <td>Anal insertive</td> <td><input type="checkbox"/></td> <td><input type="checkbox"/></td> </tr> <tr> <td>Anal receptive</td> <td><input type="checkbox"/></td> <td><input type="checkbox"/></td> </tr> <tr> <td>Vaginal</td> <td><input type="checkbox"/></td> <td><input type="checkbox"/></td> </tr> </table> |                                                                                                                     | Type of sex | Yes | No | Oral received | <input type="checkbox"/> | <input type="checkbox"/> | Oral performed | <input type="checkbox"/> | <input type="checkbox"/> | Anal insertive | <input type="checkbox"/> | <input type="checkbox"/> | Anal receptive | <input type="checkbox"/> | <input type="checkbox"/> | Vaginal | <input type="checkbox"/> | <input type="checkbox"/> |
| Type of sex                                                                                                                                     | Yes                                                                                                                                                                                                                                                                                                                                                                                                                                                                                                                                                                                                             | No                                                                                                                  |             |     |    |               |                          |                          |                |                          |                          |                |                          |                          |                |                          |                          |         |                          |                          |
| Oral received                                                                                                                                   | <input type="checkbox"/>                                                                                                                                                                                                                                                                                                                                                                                                                                                                                                                                                                                        | <input type="checkbox"/>                                                                                            |             |     |    |               |                          |                          |                |                          |                          |                |                          |                          |                |                          |                          |         |                          |                          |
| Oral performed                                                                                                                                  | <input type="checkbox"/>                                                                                                                                                                                                                                                                                                                                                                                                                                                                                                                                                                                        | <input type="checkbox"/>                                                                                            |             |     |    |               |                          |                          |                |                          |                          |                |                          |                          |                |                          |                          |         |                          |                          |
| Anal insertive                                                                                                                                  | <input type="checkbox"/>                                                                                                                                                                                                                                                                                                                                                                                                                                                                                                                                                                                        | <input type="checkbox"/>                                                                                            |             |     |    |               |                          |                          |                |                          |                          |                |                          |                          |                |                          |                          |         |                          |                          |
| Anal receptive                                                                                                                                  | <input type="checkbox"/>                                                                                                                                                                                                                                                                                                                                                                                                                                                                                                                                                                                        | <input type="checkbox"/>                                                                                            |             |     |    |               |                          |                          |                |                          |                          |                |                          |                          |                |                          |                          |         |                          |                          |
| Vaginal                                                                                                                                         | <input type="checkbox"/>                                                                                                                                                                                                                                                                                                                                                                                                                                                                                                                                                                                        | <input type="checkbox"/>                                                                                            |             |     |    |               |                          |                          |                |                          |                          |                |                          |                          |                |                          |                          |         |                          |                          |
| 6.2.3.m Do you know or suspect that this person has other sexual partners?                                                                      | Yes <input type="checkbox"/>                                                                                                                                                                                                                                                                                                                                                                                                                                                                                                                                                                                    | No <input type="checkbox"/>                                                                                         |             |     |    |               |                          |                          |                |                          |                          |                |                          |                          |                |                          |                          |         |                          |                          |

→ Go to 7. GENITAL HYGIENE PRACTICES

|                                                                                                                                                                                                                        |                                                        |                                                  |                          |
|------------------------------------------------------------------------------------------------------------------------------------------------------------------------------------------------------------------------|--------------------------------------------------------|--------------------------------------------------|--------------------------|
| <b>7. GENITAL HYGIENE PRACTICES</b>                                                                                                                                                                                    |                                                        |                                                  |                          |
| <p><i>Now I'm going to ask you some questions about your personal hygiene practices. While some of these questions may be embarrassing or difficult to answer, please try and answer as truthfully as you can.</i></p> |                                                        |                                                  |                          |
| 7.1.a Are you circumcised?                                                                                                                                                                                             | Yes <input type="checkbox"/>                           | → Age of circumcision <input type="text"/>       | <input type="text"/>     |
|                                                                                                                                                                                                                        | No <input type="checkbox"/>                            |                                                  |                          |
| →7.1.b Where were you circumcised?                                                                                                                                                                                     | Traditional initiation school <input type="checkbox"/> | Other religious setting <input type="checkbox"/> |                          |
|                                                                                                                                                                                                                        | Health care facility <input type="checkbox"/>          | Don't know <input type="checkbox"/>              |                          |
| 7.2.a Do you clean your penis before and/or after you have sex?                                                                                                                                                        | Yes, before sex <input type="checkbox"/>               |                                                  |                          |
|                                                                                                                                                                                                                        | Yes, before and after sex <input type="checkbox"/>     |                                                  |                          |
|                                                                                                                                                                                                                        | Yes, after sex <input type="checkbox"/>                |                                                  |                          |
|                                                                                                                                                                                                                        | No <input type="checkbox"/>                            | →IF <b>NO</b> , go to 8.4.a                      |                          |
| →7.2.b IF <b>YES</b> , what do you use to clean your penis before and/or after sex?                                                                                                                                    | Item                                                   | Yes                                              | No                       |
|                                                                                                                                                                                                                        | Water                                                  | <input type="checkbox"/>                         | <input type="checkbox"/> |
|                                                                                                                                                                                                                        | Water and soap                                         | <input type="checkbox"/>                         | <input type="checkbox"/> |
|                                                                                                                                                                                                                        | Imbiza/herbs                                           | <input type="checkbox"/>                         | <input type="checkbox"/> |
|                                                                                                                                                                                                                        | Cloth/towel to wipe/apply products                     | <input type="checkbox"/>                         | <input type="checkbox"/> |
|                                                                                                                                                                                                                        | Other household products                               | <input type="checkbox"/>                         | <input type="checkbox"/> |
| →Tick <b>MULTIPLE RESPONSES</b> if applicable                                                                                                                                                                          |                                                        |                                                  |                          |
| 7.3 How often do you clean your penis at the time of sex?                                                                                                                                                              | Always <input type="checkbox"/>                        |                                                  |                          |
|                                                                                                                                                                                                                        | More than half of sex acts <input type="checkbox"/>    |                                                  |                          |
|                                                                                                                                                                                                                        | Less than half of sex acts <input type="checkbox"/>    |                                                  |                          |
| 7.4.a Did you use any substances to enhance your sexual performance?                                                                                                                                                   | Yes <input type="checkbox"/>                           | No <input type="checkbox"/>                      |                          |
| →7.4.b IF <b>YES</b> , what products did you use to enhance your sexual performance?                                                                                                                                   | <b>Substances</b>                                      | <b>Yes</b>                                       | <b>No</b>                |
|                                                                                                                                                                                                                        | Taken orally                                           | <input type="checkbox"/>                         | <input type="checkbox"/> |
|                                                                                                                                                                                                                        | Applied to penis                                       | <input type="checkbox"/>                         | <input type="checkbox"/> |
|                                                                                                                                                                                                                        | Pills                                                  | <input type="checkbox"/>                         | <input type="checkbox"/> |
|                                                                                                                                                                                                                        | Other                                                  | <input type="checkbox"/>                         | <input type="checkbox"/> |
| (Substances: Imbiza/muti/herbs/powders)                                                                                                                                                                                | Other specify _____                                    |                                                  |                          |

7.5 Do you know whether your sexual partner/s  
use products other than water to clean or  
tighten his/her genital area before and/or  
after sex?

Yes ☐

No ☐

Don't know ☐

→Go to 8.

## 8. SEXUAL HEALTH HISTORY

8.1 Have you ever had a sexually transmitted infection? Yes ☐ No ☐  
Don't know ☐

8.2 In the last 3 months, has a health care provider other than someone from the study, diagnosed you with or treated you for any of the following sexually transmitted or genital infections:

|                                                                                | Yes                      | No                       | Don't know               |
|--------------------------------------------------------------------------------|--------------------------|--------------------------|--------------------------|
| Burning urine or discharge from the penis                                      | <input type="checkbox"/> | <input type="checkbox"/> | <input type="checkbox"/> |
| Genital ulcer disease (including genital herpes)                               | <input type="checkbox"/> | <input type="checkbox"/> | <input type="checkbox"/> |
| Swollen glands in the groin (Bubo)                                             | <input type="checkbox"/> | <input type="checkbox"/> | <input type="checkbox"/> |
| Pain or swelling of testicles                                                  | <input type="checkbox"/> | <input type="checkbox"/> | <input type="checkbox"/> |
| Genital warts                                                                  | <input type="checkbox"/> | <input type="checkbox"/> | <input type="checkbox"/> |
| NA <input type="checkbox"/> For <b>MSM</b> : Pain or discharge from the rectum | <input type="checkbox"/> | <input type="checkbox"/> | <input type="checkbox"/> |
| Syphilis (by serological test)                                                 | <input type="checkbox"/> | <input type="checkbox"/> | <input type="checkbox"/> |

8.3 Were you diagnosed with a sexually transmitted infection but don't know the name or it is not listed above? Yes ☐ → Details \_\_\_\_\_  
No ☐  
Don't know ☐

8.4 Were you given treatment because your partner had a sexually transmitted infection? Yes ☐ No ☐  
Don't know ☐

8.5 Have you sought care from anywhere other than a government clinic in the past 12 months? Yes ☐ → Details \_\_\_\_\_  
No ☐ → Go to Question 8.6

8.6 IF you received treatment, did you:

→8.6.a Complete your treatment as prescribed? Yes ☐ No ☐

→8.6.b Have sex while taking treatment? Yes ☐ No ☐

→8.6.c IF **you had sex while taking treatment**, did you use a condom for every sex act?  
Yes ☐ No ☐

→8.6.d Were all your partners treated? Yes ☐ No ☐  
Don't know ☐ Not applicable ☐

→8.6.e Do you still have any genital symptoms? Yes ☐ No ☐

Not applicable ☐

| 8.7 In the past 7 days, have you experienced:                                        |                                                    | Yes                      | No                       | Don't Know               |
|--------------------------------------------------------------------------------------|----------------------------------------------------|--------------------------|--------------------------|--------------------------|
|                                                                                      | Burning urine or discharge from the penis          | <input type="checkbox"/> | <input type="checkbox"/> | <input type="checkbox"/> |
|                                                                                      | Blisters or sores in the genital area              | <input type="checkbox"/> | <input type="checkbox"/> | <input type="checkbox"/> |
|                                                                                      | Swollen glands in the groin (Bubo)                 | <input type="checkbox"/> | <input type="checkbox"/> | <input type="checkbox"/> |
|                                                                                      | Pain or swelling of testicles                      | <input type="checkbox"/> | <input type="checkbox"/> | <input type="checkbox"/> |
|                                                                                      | Genital warts                                      | <input type="checkbox"/> | <input type="checkbox"/> | <input type="checkbox"/> |
| NA<br><input type="checkbox"/>                                                       | For <b>MSM</b> : Pain or discharge from the rectum | <input type="checkbox"/> | <input type="checkbox"/> | <input type="checkbox"/> |
| 8.8 In the past 7 days have you been given treatment because your partner has an STI |                                                    | <input type="checkbox"/> | <input type="checkbox"/> | <input type="checkbox"/> |

→Go to 9. PHYSICAL EXAMINATION

|                                                                |                                      |                                                                                                 |                          |                          |                                                                                |                                                                    |
|----------------------------------------------------------------|--------------------------------------|-------------------------------------------------------------------------------------------------|--------------------------|--------------------------|--------------------------------------------------------------------------------|--------------------------------------------------------------------|
| <b>9. PHYSICAL EXAMINATION</b>                                 |                                      |                                                                                                 |                          |                          |                                                                                |                                                                    |
| 9.1 Body Temperature                                           |                                      | <input type="text"/> <input type="text"/> <input type="text"/> °C                               |                          |                          |                                                                                |                                                                    |
| 9.2 Height                                                     |                                      | <input type="text"/> . <input type="text"/> <input type="text"/> meters                         |                          |                          |                                                                                |                                                                    |
| 9.3 Weight                                                     |                                      | <input type="text"/> <input type="text"/> <input type="text"/> . <input type="text"/> kilograms |                          |                          |                                                                                |                                                                    |
| 9.4 Heart Rate                                                 |                                      | <input type="text"/> <input type="text"/> <input type="text"/> per minute                       |                          |                          |                                                                                |                                                                    |
| 9.5 Blood Pressure                                             |                                      | Systolic: <input type="text"/> <input type="text"/> <input type="text"/> mmHg                   |                          |                          | Diastolic: <input type="text"/> <input type="text"/> <input type="text"/> mmHg |                                                                    |
| <b>9.6 Body system or Part Observations</b> (only if required) |                                      | <b>Not Examined</b>                                                                             | <b>Normal</b>            | <b>Abnormal</b>          | <b>→IF ABNORMAL, details below:</b>                                            |                                                                    |
| a.                                                             | Skin and mucous membranes            | <input type="checkbox"/>                                                                        | <input type="checkbox"/> | <input type="checkbox"/> |                                                                                |                                                                    |
| b.                                                             | Head and neck                        | <input type="checkbox"/>                                                                        | <input type="checkbox"/> | <input type="checkbox"/> |                                                                                |                                                                    |
| c.                                                             | Cardiovascular                       | <input type="checkbox"/>                                                                        | <input type="checkbox"/> | <input type="checkbox"/> |                                                                                |                                                                    |
| d.                                                             | Respiratory                          | <input type="checkbox"/>                                                                        | <input type="checkbox"/> | <input type="checkbox"/> |                                                                                |                                                                    |
| e.                                                             | Gastrointestinal (abdominal & liver) | <input type="checkbox"/>                                                                        | <input type="checkbox"/> | <input type="checkbox"/> |                                                                                |                                                                    |
| f.                                                             | Neurological                         | <input type="checkbox"/>                                                                        | <input type="checkbox"/> | <input type="checkbox"/> |                                                                                |                                                                    |
| g.                                                             | Genital                              | <input type="checkbox"/>                                                                        | <input type="checkbox"/> | <input type="checkbox"/> |                                                                                |                                                                    |
| <b>9.7 Genital Examination Observations</b>                    |                                      | <b>Not Examined</b>                                                                             | <b>No</b>                | <b>Yes</b>               | <b>→IF YES details below:</b>                                                  |                                                                    |
| a.                                                             | Is participant circumcised?          | <input type="checkbox"/>                                                                        | <input type="checkbox"/> | <input type="checkbox"/> | Partial <input type="checkbox"/>                                               | Full <input type="checkbox"/>                                      |
| b.                                                             | Inguinal lymphadenopathy?            | <input type="checkbox"/>                                                                        | <input type="checkbox"/> | <input type="checkbox"/> | Single <input type="checkbox"/>                                                | Multiple <input type="checkbox"/><br>Bubo <input type="checkbox"/> |
| c.                                                             | Balanitis?                           | <input type="checkbox"/>                                                                        | <input type="checkbox"/> | <input type="checkbox"/> |                                                                                |                                                                    |
| d.                                                             | Discharge?                           | <input type="checkbox"/>                                                                        | <input type="checkbox"/> | <input type="checkbox"/> | Meatal <input type="checkbox"/>                                                | Subpreputial <input type="checkbox"/>                              |
| <b>9.7 General examinations</b>                                |                                      | <b>Not examined</b>                                                                             | <b>No</b>                | <b>Yes</b>               | <b>If yes give details</b>                                                     |                                                                    |

|    |                                                                                                                    |                                                                                                                                                                                                                                                                                                                                                                                                                                                                                                                                                                                                                                                                                                                                                                                                                                                                                                                                              |
|----|--------------------------------------------------------------------------------------------------------------------|----------------------------------------------------------------------------------------------------------------------------------------------------------------------------------------------------------------------------------------------------------------------------------------------------------------------------------------------------------------------------------------------------------------------------------------------------------------------------------------------------------------------------------------------------------------------------------------------------------------------------------------------------------------------------------------------------------------------------------------------------------------------------------------------------------------------------------------------------------------------------------------------------------------------------------------------|
| e. | Ulcers? <input type="checkbox"/> <input type="checkbox"/> <input type="checkbox"/>                                 | <div style="display: flex; justify-content: space-between;"> <div>           IF <b>YES</b>, →<br/>           →         </div> <div>           Ulcer Number: Single <input type="checkbox"/> Multiple <input type="checkbox"/><br/>           Ulcer Location: Prepuce <input type="checkbox"/> Glans <input type="checkbox"/> Shaft <input type="checkbox"/><br/>           Inguinal <input type="checkbox"/> Buttocks <input type="checkbox"/> Perianal <input type="checkbox"/><br/>           Other <input type="checkbox"/> </div> </div> <div style="display: flex; justify-content: space-between; margin-top: 10px;"> <div>           → Ulcer Pain: Yes <input type="checkbox"/> No <input type="checkbox"/><br/>           → Ulcer Bleeding: Yes <input type="checkbox"/> No <input type="checkbox"/> </div> </div> <div style="text-align: right; margin-top: 10px;"> <b>IF YES and Consented to photography-Take a photo</b> </div> |
| f. | Warts? <input type="checkbox"/> <input type="checkbox"/> <input type="checkbox"/>                                  | <div style="display: flex; justify-content: space-between;"> <div></div> <div>           Single <input type="checkbox"/> Multiple <input type="checkbox"/> </div> </div> <div style="margin-top: 10px;">           Location: _____<br/> <b>IF YES and Consented to photography-Take a photo</b> </div>                                                                                                                                                                                                                                                                                                                                                                                                                                                                                                                                                                                                                                       |
| g. | Peri-anal abnormalities? <input type="checkbox"/> <input type="checkbox"/> <input type="checkbox"/>                | <div style="margin-top: 10px;">           Details, _____<br/> <b>IF YES and Consented to photography-Take a photo</b> </div>                                                                                                                                                                                                                                                                                                                                                                                                                                                                                                                                                                                                                                                                                                                                                                                                                 |
| h. | Other genital abnormality or deformity? <input type="checkbox"/> <input type="checkbox"/> <input type="checkbox"/> | <div style="margin-top: 10px;">           Details, _____<br/> <b>IF YES and Consented to photography-Take a photo</b> </div>                                                                                                                                                                                                                                                                                                                                                                                                                                                                                                                                                                                                                                                                                                                                                                                                                 |

→Go to 10. LABORATORY SAMPLE COLLECTION

| 10. Samples collected     |                                                          |
|---------------------------|----------------------------------------------------------|
| <b>Blood samples</b>      |                                                          |
| HIV PVL                   | Yes <input type="checkbox"/> No <input type="checkbox"/> |
| CD4+ cell count           | Yes <input type="checkbox"/> No <input type="checkbox"/> |
| HBsAntigen                | Yes <input type="checkbox"/> No <input type="checkbox"/> |
| Syphilis serology:        |                                                          |
| RPR                       | Yes <input type="checkbox"/> No <input type="checkbox"/> |
| TPHA                      | Yes <input type="checkbox"/> No <input type="checkbox"/> |
| HSV – 2 serology          | Yes <input type="checkbox"/> No <input type="checkbox"/> |
| HPV serology              | Yes <input type="checkbox"/> No <input type="checkbox"/> |
| <b>Urine samples</b>      |                                                          |
| <i>C. trachomatis</i> PCR | Yes <input type="checkbox"/> No <input type="checkbox"/> |
| <i>N. gonorrhoeae</i> PCR | Yes <input type="checkbox"/> No <input type="checkbox"/> |
| <i>T. vaginalis</i> PCR   | Yes <input type="checkbox"/> No <input type="checkbox"/> |
| <i>M. genitalium</i> PCR  | Yes <input type="checkbox"/> No <input type="checkbox"/> |
| <b>Genital samples</b>    |                                                          |
| HPV genital swab          | Yes <input type="checkbox"/> No <input type="checkbox"/> |
| HPV anal canal swab       | Yes <input type="checkbox"/> No <input type="checkbox"/> |
| Anal cytology swab        | Yes <input type="checkbox"/> No <input type="checkbox"/> |
| <b>Oral samples</b>       |                                                          |
| oral rinse sample         | Yes <input type="checkbox"/> No <input type="checkbox"/> |
| oral HPV swab             | Yes <input type="checkbox"/> No <input type="checkbox"/> |

|                                                                                                                                                        |                              |                             |
|--------------------------------------------------------------------------------------------------------------------------------------------------------|------------------------------|-----------------------------|
| <b>11. DIAGNOSIS AND TREATMENT</b>                                                                                                                     |                              |                             |
| <i>IF REQUIRED, please provide participant with <b>script for treatment</b> to be collected at the pharmacy and <b>partner notification slips</b>.</i> |                              |                             |
| 11.1 Was the participant treated presumptively for any of the following at this visit?                                                                 | <b>Yes</b>                   | <b>No</b>                   |
| Urethritis syndrome                                                                                                                                    | <input type="checkbox"/>     | <input type="checkbox"/>    |
| Genital ulcer syndrome                                                                                                                                 | <input type="checkbox"/>     | <input type="checkbox"/>    |
| Scrotal swelling                                                                                                                                       | <input type="checkbox"/>     | <input type="checkbox"/>    |
| Balanitis / Balanoposthitis                                                                                                                            | <input type="checkbox"/>     | <input type="checkbox"/>    |
| Bubo                                                                                                                                                   | <input type="checkbox"/>     | <input type="checkbox"/>    |
| Molluscum contagiosum                                                                                                                                  | <input type="checkbox"/>     | <input type="checkbox"/>    |
| Genital Warts                                                                                                                                          | <input type="checkbox"/>     | <input type="checkbox"/>    |
| Pubic lice                                                                                                                                             | <input type="checkbox"/>     | <input type="checkbox"/>    |
| <b>If Yes to any complete the concomitant Log</b>                                                                                                      |                              |                             |
| 11.2.a Did the participant require treatment for ANY OTHER CONDITION?                                                                                  | Yes <input type="checkbox"/> | No <input type="checkbox"/> |
| <b>If yes to any complete the concomitant Log</b>                                                                                                      |                              |                             |
| →11.2.b IF <b>YES</b> , provide details                                                                                                                |                              |                             |
