# Supplementary material
Source: publisher figshare collection journal article supplement (https://plos.figshare.com/articles/dataset/_/11324555)
Supplement: Supplementary file 1 [file 1 › pone.0225571.s005.pdf]

**Case Report Form HIM: Follow-up Visit****Participant ID**

□□□□-□

**Visit Date**

□□/□□/□□□□

**Visit Code**

□□.□

**Staff Initials**

□□□

**DD / MM / Y Y Y Y****1. MEDICAL HISTORY***I'd like to ask you some general questions about your health. Since your last visit.*

1.1 Have you suffered from any diseases of the following, in the last 6 months?

**Yes****No****→IF YES give details and complete the SAE log:**

Heart

☐☐

Lungs

☐☐

Liver

☐☐

Kidneys

☐☐

Blood

☐☐

Digestive system

☐☐

Brain and nerves

☐☐

Hormonal system

☐☐

Skin

☐☐

Autoimmune

☐☐

1.2 Have you suffered from jaundice or hepatitis in the last 6 months?

Yes ☐No ☐↓details  
\_\_\_\_\_

1.3 Have you had fits, faints, seizures or convulsions in the last 6 months?

Yes ☐No ☐

1.4 Have you had any psychiatric problems in the last 6 months?

Yes ☐No ☐

1.5 Have you or your family ever had any bleeding or clotting disorders?

Yes ☐No ☐

1.6 Have you had a blood transfusion or received blood products in the last 6 months?

Yes ☐No ☐

1.7 Do you suffer from eczema or asthma?

Yes ☐No ☐

| 1.8 WHO clinical stage                                                                                   | I <input type="checkbox"/><br>II <input type="checkbox"/><br>III <input type="checkbox"/><br>IV <input type="checkbox"/>                                                                                                                                                                                                                                                                                                                                                                                                                                                                                                                                                                                                                                                                                                                                                                                                                                                                                                                                                                                                                                                                                                                                                                                                                                                                                                                                                                                                                                                                                                                                                                                                                                                                                                                                                                                                                                                                                                                                                                                                                                                                                                                                                                                                                         |                          |     |    |                     |                          |                          |                               |                          |                          |                            |                          |                          |                                    |                          |                          |                                                  |                          |                          |                                                 |                          |                          |                                                                              |                          |                          |             |                          |                          |                |                          |                          |      |                          |                          |
|----------------------------------------------------------------------------------------------------------|--------------------------------------------------------------------------------------------------------------------------------------------------------------------------------------------------------------------------------------------------------------------------------------------------------------------------------------------------------------------------------------------------------------------------------------------------------------------------------------------------------------------------------------------------------------------------------------------------------------------------------------------------------------------------------------------------------------------------------------------------------------------------------------------------------------------------------------------------------------------------------------------------------------------------------------------------------------------------------------------------------------------------------------------------------------------------------------------------------------------------------------------------------------------------------------------------------------------------------------------------------------------------------------------------------------------------------------------------------------------------------------------------------------------------------------------------------------------------------------------------------------------------------------------------------------------------------------------------------------------------------------------------------------------------------------------------------------------------------------------------------------------------------------------------------------------------------------------------------------------------------------------------------------------------------------------------------------------------------------------------------------------------------------------------------------------------------------------------------------------------------------------------------------------------------------------------------------------------------------------------------------------------------------------------------------------------------------------------|--------------------------|-----|----|---------------------|--------------------------|--------------------------|-------------------------------|--------------------------|--------------------------|----------------------------|--------------------------|--------------------------|------------------------------------|--------------------------|--------------------------|--------------------------------------------------|--------------------------|--------------------------|-------------------------------------------------|--------------------------|--------------------------|------------------------------------------------------------------------------|--------------------------|--------------------------|-------------|--------------------------|--------------------------|----------------|--------------------------|--------------------------|------|--------------------------|--------------------------|
| 1.9 How would you rate your health overall in the past 6 MONTHS?                                         | <div style="display: flex; justify-content: space-between;"> <div style="width: 45%;"> Excellent <input type="checkbox"/><br/> Very good <input type="checkbox"/><br/> Good <input type="checkbox"/> </div> <div style="width: 45%; text-align: right;"> Fair <input type="checkbox"/><br/> Poor (bad) <input type="checkbox"/> </div> </div>                                                                                                                                                                                                                                                                                                                                                                                                                                                                                                                                                                                                                                                                                                                                                                                                                                                                                                                                                                                                                                                                                                                                                                                                                                                                                                                                                                                                                                                                                                                                                                                                                                                                                                                                                                                                                                                                                                                                                                                                    |                          |     |    |                     |                          |                          |                               |                          |                          |                            |                          |                          |                                    |                          |                          |                                                  |                          |                          |                                                 |                          |                          |                                                                              |                          |                          |             |                          |                          |                |                          |                          |      |                          |                          |
| 1.10 In the last 6 MONTHS, did you suffer from any of the following health complaints:                   | <table style="width: 100%; border-collapse: collapse;"> <thead> <tr> <th style="width: 70%;"></th> <th style="width: 15%; text-align: center;">Yes</th> <th style="width: 15%; text-align: center;">No</th> </tr> </thead> <tbody> <tr><td style="text-align: right;">Fever for &gt; 1 month</td><td style="text-align: center;"><input type="checkbox"/></td><td style="text-align: center;"><input type="checkbox"/></td></tr> <tr><td style="text-align: right;">Persistent cough for &gt;1 month</td><td style="text-align: center;"><input type="checkbox"/></td><td style="text-align: center;"><input type="checkbox"/></td></tr> <tr><td style="text-align: right;">Night sweats for &gt; 1 month</td><td style="text-align: center;"><input type="checkbox"/></td><td style="text-align: center;"><input type="checkbox"/></td></tr> <tr><td style="text-align: right;">Pain or difficulty with swallowing</td><td style="text-align: center;"><input type="checkbox"/></td><td style="text-align: center;"><input type="checkbox"/></td></tr> <tr><td style="text-align: right;">Diarrhoea (i.e. &gt;2 loose stools/day) for &gt;1month</td><td style="text-align: center;"><input type="checkbox"/></td><td style="text-align: center;"><input type="checkbox"/></td></tr> <tr><td style="text-align: right;">Persistent mouth or genital sores for &gt; 1 month</td><td style="text-align: center;"><input type="checkbox"/></td><td style="text-align: center;"><input type="checkbox"/></td></tr> <tr><td style="text-align: right;">Unintended loss of weight (&gt; 10% body weight, i.e. &gt;7 kg for an average man)</td><td style="text-align: center;"><input type="checkbox"/></td><td style="text-align: center;"><input type="checkbox"/></td></tr> <tr><td style="text-align: right;">Skin rashes</td><td style="text-align: center;"><input type="checkbox"/></td><td style="text-align: center;"><input type="checkbox"/></td></tr> <tr><td style="text-align: right;">Swollen glands</td><td style="text-align: center;"><input type="checkbox"/></td><td style="text-align: center;"><input type="checkbox"/></td></tr> <tr><td style="text-align: right;">Fits</td><td style="text-align: center;"><input type="checkbox"/></td><td style="text-align: center;"><input type="checkbox"/></td></tr> </tbody> </table> |                          | Yes | No | Fever for > 1 month | <input type="checkbox"/> | <input type="checkbox"/> | Persistent cough for >1 month | <input type="checkbox"/> | <input type="checkbox"/> | Night sweats for > 1 month | <input type="checkbox"/> | <input type="checkbox"/> | Pain or difficulty with swallowing | <input type="checkbox"/> | <input type="checkbox"/> | Diarrhoea (i.e. >2 loose stools/day) for >1month | <input type="checkbox"/> | <input type="checkbox"/> | Persistent mouth or genital sores for > 1 month | <input type="checkbox"/> | <input type="checkbox"/> | Unintended loss of weight (> 10% body weight, i.e. >7 kg for an average man) | <input type="checkbox"/> | <input type="checkbox"/> | Skin rashes | <input type="checkbox"/> | <input type="checkbox"/> | Swollen glands | <input type="checkbox"/> | <input type="checkbox"/> | Fits | <input type="checkbox"/> | <input type="checkbox"/> |
|                                                                                                          | Yes                                                                                                                                                                                                                                                                                                                                                                                                                                                                                                                                                                                                                                                                                                                                                                                                                                                                                                                                                                                                                                                                                                                                                                                                                                                                                                                                                                                                                                                                                                                                                                                                                                                                                                                                                                                                                                                                                                                                                                                                                                                                                                                                                                                                                                                                                                                                              | No                       |     |    |                     |                          |                          |                               |                          |                          |                            |                          |                          |                                    |                          |                          |                                                  |                          |                          |                                                 |                          |                          |                                                                              |                          |                          |             |                          |                          |                |                          |                          |      |                          |                          |
| Fever for > 1 month                                                                                      | <input type="checkbox"/>                                                                                                                                                                                                                                                                                                                                                                                                                                                                                                                                                                                                                                                                                                                                                                                                                                                                                                                                                                                                                                                                                                                                                                                                                                                                                                                                                                                                                                                                                                                                                                                                                                                                                                                                                                                                                                                                                                                                                                                                                                                                                                                                                                                                                                                                                                                         | <input type="checkbox"/> |     |    |                     |                          |                          |                               |                          |                          |                            |                          |                          |                                    |                          |                          |                                                  |                          |                          |                                                 |                          |                          |                                                                              |                          |                          |             |                          |                          |                |                          |                          |      |                          |                          |
| Persistent cough for >1 month                                                                            | <input type="checkbox"/>                                                                                                                                                                                                                                                                                                                                                                                                                                                                                                                                                                                                                                                                                                                                                                                                                                                                                                                                                                                                                                                                                                                                                                                                                                                                                                                                                                                                                                                                                                                                                                                                                                                                                                                                                                                                                                                                                                                                                                                                                                                                                                                                                                                                                                                                                                                         | <input type="checkbox"/> |     |    |                     |                          |                          |                               |                          |                          |                            |                          |                          |                                    |                          |                          |                                                  |                          |                          |                                                 |                          |                          |                                                                              |                          |                          |             |                          |                          |                |                          |                          |      |                          |                          |
| Night sweats for > 1 month                                                                               | <input type="checkbox"/>                                                                                                                                                                                                                                                                                                                                                                                                                                                                                                                                                                                                                                                                                                                                                                                                                                                                                                                                                                                                                                                                                                                                                                                                                                                                                                                                                                                                                                                                                                                                                                                                                                                                                                                                                                                                                                                                                                                                                                                                                                                                                                                                                                                                                                                                                                                         | <input type="checkbox"/> |     |    |                     |                          |                          |                               |                          |                          |                            |                          |                          |                                    |                          |                          |                                                  |                          |                          |                                                 |                          |                          |                                                                              |                          |                          |             |                          |                          |                |                          |                          |      |                          |                          |
| Pain or difficulty with swallowing                                                                       | <input type="checkbox"/>                                                                                                                                                                                                                                                                                                                                                                                                                                                                                                                                                                                                                                                                                                                                                                                                                                                                                                                                                                                                                                                                                                                                                                                                                                                                                                                                                                                                                                                                                                                                                                                                                                                                                                                                                                                                                                                                                                                                                                                                                                                                                                                                                                                                                                                                                                                         | <input type="checkbox"/> |     |    |                     |                          |                          |                               |                          |                          |                            |                          |                          |                                    |                          |                          |                                                  |                          |                          |                                                 |                          |                          |                                                                              |                          |                          |             |                          |                          |                |                          |                          |      |                          |                          |
| Diarrhoea (i.e. >2 loose stools/day) for >1month                                                         | <input type="checkbox"/>                                                                                                                                                                                                                                                                                                                                                                                                                                                                                                                                                                                                                                                                                                                                                                                                                                                                                                                                                                                                                                                                                                                                                                                                                                                                                                                                                                                                                                                                                                                                                                                                                                                                                                                                                                                                                                                                                                                                                                                                                                                                                                                                                                                                                                                                                                                         | <input type="checkbox"/> |     |    |                     |                          |                          |                               |                          |                          |                            |                          |                          |                                    |                          |                          |                                                  |                          |                          |                                                 |                          |                          |                                                                              |                          |                          |             |                          |                          |                |                          |                          |      |                          |                          |
| Persistent mouth or genital sores for > 1 month                                                          | <input type="checkbox"/>                                                                                                                                                                                                                                                                                                                                                                                                                                                                                                                                                                                                                                                                                                                                                                                                                                                                                                                                                                                                                                                                                                                                                                                                                                                                                                                                                                                                                                                                                                                                                                                                                                                                                                                                                                                                                                                                                                                                                                                                                                                                                                                                                                                                                                                                                                                         | <input type="checkbox"/> |     |    |                     |                          |                          |                               |                          |                          |                            |                          |                          |                                    |                          |                          |                                                  |                          |                          |                                                 |                          |                          |                                                                              |                          |                          |             |                          |                          |                |                          |                          |      |                          |                          |
| Unintended loss of weight (> 10% body weight, i.e. >7 kg for an average man)                             | <input type="checkbox"/>                                                                                                                                                                                                                                                                                                                                                                                                                                                                                                                                                                                                                                                                                                                                                                                                                                                                                                                                                                                                                                                                                                                                                                                                                                                                                                                                                                                                                                                                                                                                                                                                                                                                                                                                                                                                                                                                                                                                                                                                                                                                                                                                                                                                                                                                                                                         | <input type="checkbox"/> |     |    |                     |                          |                          |                               |                          |                          |                            |                          |                          |                                    |                          |                          |                                                  |                          |                          |                                                 |                          |                          |                                                                              |                          |                          |             |                          |                          |                |                          |                          |      |                          |                          |
| Skin rashes                                                                                              | <input type="checkbox"/>                                                                                                                                                                                                                                                                                                                                                                                                                                                                                                                                                                                                                                                                                                                                                                                                                                                                                                                                                                                                                                                                                                                                                                                                                                                                                                                                                                                                                                                                                                                                                                                                                                                                                                                                                                                                                                                                                                                                                                                                                                                                                                                                                                                                                                                                                                                         | <input type="checkbox"/> |     |    |                     |                          |                          |                               |                          |                          |                            |                          |                          |                                    |                          |                          |                                                  |                          |                          |                                                 |                          |                          |                                                                              |                          |                          |             |                          |                          |                |                          |                          |      |                          |                          |
| Swollen glands                                                                                           | <input type="checkbox"/>                                                                                                                                                                                                                                                                                                                                                                                                                                                                                                                                                                                                                                                                                                                                                                                                                                                                                                                                                                                                                                                                                                                                                                                                                                                                                                                                                                                                                                                                                                                                                                                                                                                                                                                                                                                                                                                                                                                                                                                                                                                                                                                                                                                                                                                                                                                         | <input type="checkbox"/> |     |    |                     |                          |                          |                               |                          |                          |                            |                          |                          |                                    |                          |                          |                                                  |                          |                          |                                                 |                          |                          |                                                                              |                          |                          |             |                          |                          |                |                          |                          |      |                          |                          |
| Fits                                                                                                     | <input type="checkbox"/>                                                                                                                                                                                                                                                                                                                                                                                                                                                                                                                                                                                                                                                                                                                                                                                                                                                                                                                                                                                                                                                                                                                                                                                                                                                                                                                                                                                                                                                                                                                                                                                                                                                                                                                                                                                                                                                                                                                                                                                                                                                                                                                                                                                                                                                                                                                         | <input type="checkbox"/> |     |    |                     |                          |                          |                               |                          |                          |                            |                          |                          |                                    |                          |                          |                                                  |                          |                          |                                                 |                          |                          |                                                                              |                          |                          |             |                          |                          |                |                          |                          |      |                          |                          |
| 1.11 In the past 6 MONTHS, did a health care provider diagnose you with any of the following conditions: | <table style="width: 100%; border-collapse: collapse;"> <thead> <tr> <th style="width: 70%;"></th> <th style="width: 15%; text-align: center;">Yes</th> <th style="width: 15%; text-align: center;">No</th> </tr> </thead> <tbody> <tr><td style="text-align: right;">TB</td><td style="text-align: center;"><input type="checkbox"/></td><td style="text-align: center;"><input type="checkbox"/></td></tr> <tr><td style="text-align: right;">Pneumonia</td><td style="text-align: center;"><input type="checkbox"/></td><td style="text-align: center;"><input type="checkbox"/></td></tr> <tr><td style="text-align: right;">Shingles</td><td style="text-align: center;"><input type="checkbox"/></td><td style="text-align: center;"><input type="checkbox"/></td></tr> <tr><td style="text-align: right;">Oral thrush</td><td style="text-align: center;"><input type="checkbox"/></td><td style="text-align: center;"><input type="checkbox"/></td></tr> <tr><td style="text-align: right;">Meningitis</td><td style="text-align: center;"><input type="checkbox"/></td><td style="text-align: center;"><input type="checkbox"/></td></tr> <tr><td style="text-align: right;">Kaposi's Sarcoma</td><td style="text-align: center;"><input type="checkbox"/></td><td style="text-align: center;"><input type="checkbox"/></td></tr> </tbody> </table>                                                                                                                                                                                                                                                                                                                                                                                                                                                                                                                                                                                                                                                                                                                                                                                                                                                                                                                                                                                     |                          | Yes | No | TB                  | <input type="checkbox"/> | <input type="checkbox"/> | Pneumonia                     | <input type="checkbox"/> | <input type="checkbox"/> | Shingles                   | <input type="checkbox"/> | <input type="checkbox"/> | Oral thrush                        | <input type="checkbox"/> | <input type="checkbox"/> | Meningitis                                       | <input type="checkbox"/> | <input type="checkbox"/> | Kaposi's Sarcoma                                | <input type="checkbox"/> | <input type="checkbox"/> |                                                                              |                          |                          |             |                          |                          |                |                          |                          |      |                          |                          |
|                                                                                                          | Yes                                                                                                                                                                                                                                                                                                                                                                                                                                                                                                                                                                                                                                                                                                                                                                                                                                                                                                                                                                                                                                                                                                                                                                                                                                                                                                                                                                                                                                                                                                                                                                                                                                                                                                                                                                                                                                                                                                                                                                                                                                                                                                                                                                                                                                                                                                                                              | No                       |     |    |                     |                          |                          |                               |                          |                          |                            |                          |                          |                                    |                          |                          |                                                  |                          |                          |                                                 |                          |                          |                                                                              |                          |                          |             |                          |                          |                |                          |                          |      |                          |                          |
| TB                                                                                                       | <input type="checkbox"/>                                                                                                                                                                                                                                                                                                                                                                                                                                                                                                                                                                                                                                                                                                                                                                                                                                                                                                                                                                                                                                                                                                                                                                                                                                                                                                                                                                                                                                                                                                                                                                                                                                                                                                                                                                                                                                                                                                                                                                                                                                                                                                                                                                                                                                                                                                                         | <input type="checkbox"/> |     |    |                     |                          |                          |                               |                          |                          |                            |                          |                          |                                    |                          |                          |                                                  |                          |                          |                                                 |                          |                          |                                                                              |                          |                          |             |                          |                          |                |                          |                          |      |                          |                          |
| Pneumonia                                                                                                | <input type="checkbox"/>                                                                                                                                                                                                                                                                                                                                                                                                                                                                                                                                                                                                                                                                                                                                                                                                                                                                                                                                                                                                                                                                                                                                                                                                                                                                                                                                                                                                                                                                                                                                                                                                                                                                                                                                                                                                                                                                                                                                                                                                                                                                                                                                                                                                                                                                                                                         | <input type="checkbox"/> |     |    |                     |                          |                          |                               |                          |                          |                            |                          |                          |                                    |                          |                          |                                                  |                          |                          |                                                 |                          |                          |                                                                              |                          |                          |             |                          |                          |                |                          |                          |      |                          |                          |
| Shingles                                                                                                 | <input type="checkbox"/>                                                                                                                                                                                                                                                                                                                                                                                                                                                                                                                                                                                                                                                                                                                                                                                                                                                                                                                                                                                                                                                                                                                                                                                                                                                                                                                                                                                                                                                                                                                                                                                                                                                                                                                                                                                                                                                                                                                                                                                                                                                                                                                                                                                                                                                                                                                         | <input type="checkbox"/> |     |    |                     |                          |                          |                               |                          |                          |                            |                          |                          |                                    |                          |                          |                                                  |                          |                          |                                                 |                          |                          |                                                                              |                          |                          |             |                          |                          |                |                          |                          |      |                          |                          |
| Oral thrush                                                                                              | <input type="checkbox"/>                                                                                                                                                                                                                                                                                                                                                                                                                                                                                                                                                                                                                                                                                                                                                                                                                                                                                                                                                                                                                                                                                                                                                                                                                                                                                                                                                                                                                                                                                                                                                                                                                                                                                                                                                                                                                                                                                                                                                                                                                                                                                                                                                                                                                                                                                                                         | <input type="checkbox"/> |     |    |                     |                          |                          |                               |                          |                          |                            |                          |                          |                                    |                          |                          |                                                  |                          |                          |                                                 |                          |                          |                                                                              |                          |                          |             |                          |                          |                |                          |                          |      |                          |                          |
| Meningitis                                                                                               | <input type="checkbox"/>                                                                                                                                                                                                                                                                                                                                                                                                                                                                                                                                                                                                                                                                                                                                                                                                                                                                                                                                                                                                                                                                                                                                                                                                                                                                                                                                                                                                                                                                                                                                                                                                                                                                                                                                                                                                                                                                                                                                                                                                                                                                                                                                                                                                                                                                                                                         | <input type="checkbox"/> |     |    |                     |                          |                          |                               |                          |                          |                            |                          |                          |                                    |                          |                          |                                                  |                          |                          |                                                 |                          |                          |                                                                              |                          |                          |             |                          |                          |                |                          |                          |      |                          |                          |
| Kaposi's Sarcoma                                                                                         | <input type="checkbox"/>                                                                                                                                                                                                                                                                                                                                                                                                                                                                                                                                                                                                                                                                                                                                                                                                                                                                                                                                                                                                                                                                                                                                                                                                                                                                                                                                                                                                                                                                                                                                                                                                                                                                                                                                                                                                                                                                                                                                                                                                                                                                                                                                                                                                                                                                                                                         | <input type="checkbox"/> |     |    |                     |                          |                          |                               |                          |                          |                            |                          |                          |                                    |                          |                          |                                                  |                          |                          |                                                 |                          |                          |                                                                              |                          |                          |             |                          |                          |                |                          |                          |      |                          |                          |
| 1.12 In the past 6 MONTHS, have you been admitted to hospital?                                           | Yes <input type="checkbox"/> → <b>Specify and fill the AE</b><br>No <input type="checkbox"/> <b>log</b> _____                                                                                                                                                                                                                                                                                                                                                                                                                                                                                                                                                                                                                                                                                                                                                                                                                                                                                                                                                                                                                                                                                                                                                                                                                                                                                                                                                                                                                                                                                                                                                                                                                                                                                                                                                                                                                                                                                                                                                                                                                                                                                                                                                                                                                                    |                          |     |    |                     |                          |                          |                               |                          |                          |                            |                          |                          |                                    |                          |                          |                                                  |                          |                          |                                                 |                          |                          |                                                                              |                          |                          |             |                          |                          |                |                          |                          |      |                          |                          |

|                                                                                                           |                                                                                                                                                                                                                                                                                                                                                     |                                                                                                                                        |
|-----------------------------------------------------------------------------------------------------------|-----------------------------------------------------------------------------------------------------------------------------------------------------------------------------------------------------------------------------------------------------------------------------------------------------------------------------------------------------|----------------------------------------------------------------------------------------------------------------------------------------|
| 1.13 What is your ART status?                                                                             | <b>Status</b><br><br>Never taken ARVs <input type="checkbox"/> <b>Go to 1.18</b><br><br>On treatment <input type="checkbox"/> <b>Go to 1.14</b><br><br>Past prophylaxis <input type="checkbox"/> <b>Go to 1.18</b>                                                                                                                                  |                                                                                                                                        |
| 1.14a First date on ART                                                                                   | <input type="text"/> / <input type="text"/> / <input type="text"/> <input type="text"/> <input type="text"/><br><b>(dd/mm/yyyy)</b>                                                                                                                                                                                                                 |                                                                                                                                        |
| 1.14b For how long have you been on ART?                                                                  | <input type="text"/> <input type="text"/> years <input type="text"/> <input type="text"/> months                                                                                                                                                                                                                                                    |                                                                                                                                        |
| 1.14c1 What is the ART code (Refer to the HIM-SA ATC code)<br><br>1.14c2 What is the therapy edge number? | <input type="text"/> <input type="text"/> <input type="text"/> <input type="text"/> <input type="text"/> <input type="text"/><br><b>(Drop down menu eg <i>Jo5XXo6</i>)</b><br><br><input type="text"/> <input type="text"/> <input type="text"/> <input type="text"/> <input type="text"/> <input type="text"/> <b>N/A</b> <input type="checkbox"/> |                                                                                                                                        |
| 1.15 What is the line of treatment?                                                                       | 1 <input type="checkbox"/><br><br>2 <input type="checkbox"/><br><br>3 <input type="checkbox"/>                                                                                                                                                                                                                                                      | $\geq 3$ <input type="checkbox"/><br><br>Missing <input type="checkbox"/><br><br>Unknown <input type="checkbox"/>                      |
| 1.16 How well do you adhere to your ART?                                                                  | <input type="checkbox"/> None (< 10%)<br><br><input type="checkbox"/> A few times (10-30%)<br><br><input type="checkbox"/> About half the times (30-60%)                                                                                                                                                                                            | <input type="checkbox"/> Most of the times (60-90%)<br><br><input type="checkbox"/> All (>90%)<br><br><input type="checkbox"/> Unknown |

| 1.17 What are some of the reason(s) that make you not take your medication? <i>(Tick all that apply)</i>              | <table border="1"> <thead> <tr> <th>Reason</th> <th>Yes</th> <th>No</th> </tr> </thead> <tbody> <tr> <td>Toxicity</td> <td><input type="checkbox"/></td> <td><input type="checkbox"/></td> </tr> <tr> <td>Share with others</td> <td><input type="checkbox"/></td> <td><input type="checkbox"/></td> </tr> <tr> <td>Forgot</td> <td><input type="checkbox"/></td> <td><input type="checkbox"/></td> </tr> <tr> <td>Felt better</td> <td><input type="checkbox"/></td> <td><input type="checkbox"/></td> </tr> <tr> <td>Stock out</td> <td><input type="checkbox"/></td> <td><input type="checkbox"/></td> </tr> <tr> <td>Lost pills</td> <td><input type="checkbox"/></td> <td><input type="checkbox"/></td> </tr> </tbody> </table> | Reason                   | Yes | No | Toxicity | <input type="checkbox"/> | <input type="checkbox"/> | Share with others | <input type="checkbox"/> | <input type="checkbox"/> | Forgot | <input type="checkbox"/> | <input type="checkbox"/> | Felt better | <input type="checkbox"/> | <input type="checkbox"/> | Stock out | <input type="checkbox"/> | <input type="checkbox"/> | Lost pills | <input type="checkbox"/> | <input type="checkbox"/> | <table border="1"> <thead> <tr> <th>Reason</th> <th>Yes</th> <th>No</th> </tr> </thead> <tbody> <tr> <td>Missed appointment</td> <td><input type="checkbox"/></td> <td><input type="checkbox"/></td> </tr> <tr> <td>Ran out of Rx</td> <td><input type="checkbox"/></td> <td><input type="checkbox"/></td> </tr> <tr> <td>They taste badly</td> <td><input type="checkbox"/></td> <td><input type="checkbox"/></td> </tr> <tr> <td>Other</td> <td><input type="checkbox"/></td> <td><input type="checkbox"/></td> </tr> <tr> <td>Unknown</td> <td><input type="checkbox"/></td> <td><input type="checkbox"/></td> </tr> </tbody> </table> | Reason | Yes | No | Missed appointment | <input type="checkbox"/> | <input type="checkbox"/> | Ran out of Rx | <input type="checkbox"/> | <input type="checkbox"/> | They taste badly | <input type="checkbox"/> | <input type="checkbox"/> | Other | <input type="checkbox"/> | <input type="checkbox"/> | Unknown | <input type="checkbox"/> | <input type="checkbox"/> |
|-----------------------------------------------------------------------------------------------------------------------|--------------------------------------------------------------------------------------------------------------------------------------------------------------------------------------------------------------------------------------------------------------------------------------------------------------------------------------------------------------------------------------------------------------------------------------------------------------------------------------------------------------------------------------------------------------------------------------------------------------------------------------------------------------------------------------------------------------------------------------|--------------------------|-----|----|----------|--------------------------|--------------------------|-------------------|--------------------------|--------------------------|--------|--------------------------|--------------------------|-------------|--------------------------|--------------------------|-----------|--------------------------|--------------------------|------------|--------------------------|--------------------------|-------------------------------------------------------------------------------------------------------------------------------------------------------------------------------------------------------------------------------------------------------------------------------------------------------------------------------------------------------------------------------------------------------------------------------------------------------------------------------------------------------------------------------------------------------------------------------------------------------------------------------------------|--------|-----|----|--------------------|--------------------------|--------------------------|---------------|--------------------------|--------------------------|------------------|--------------------------|--------------------------|-------|--------------------------|--------------------------|---------|--------------------------|--------------------------|
| Reason                                                                                                                | Yes                                                                                                                                                                                                                                                                                                                                                                                                                                                                                                                                                                                                                                                                                                                                  | No                       |     |    |          |                          |                          |                   |                          |                          |        |                          |                          |             |                          |                          |           |                          |                          |            |                          |                          |                                                                                                                                                                                                                                                                                                                                                                                                                                                                                                                                                                                                                                           |        |     |    |                    |                          |                          |               |                          |                          |                  |                          |                          |       |                          |                          |         |                          |                          |
| Toxicity                                                                                                              | <input type="checkbox"/>                                                                                                                                                                                                                                                                                                                                                                                                                                                                                                                                                                                                                                                                                                             | <input type="checkbox"/> |     |    |          |                          |                          |                   |                          |                          |        |                          |                          |             |                          |                          |           |                          |                          |            |                          |                          |                                                                                                                                                                                                                                                                                                                                                                                                                                                                                                                                                                                                                                           |        |     |    |                    |                          |                          |               |                          |                          |                  |                          |                          |       |                          |                          |         |                          |                          |
| Share with others                                                                                                     | <input type="checkbox"/>                                                                                                                                                                                                                                                                                                                                                                                                                                                                                                                                                                                                                                                                                                             | <input type="checkbox"/> |     |    |          |                          |                          |                   |                          |                          |        |                          |                          |             |                          |                          |           |                          |                          |            |                          |                          |                                                                                                                                                                                                                                                                                                                                                                                                                                                                                                                                                                                                                                           |        |     |    |                    |                          |                          |               |                          |                          |                  |                          |                          |       |                          |                          |         |                          |                          |
| Forgot                                                                                                                | <input type="checkbox"/>                                                                                                                                                                                                                                                                                                                                                                                                                                                                                                                                                                                                                                                                                                             | <input type="checkbox"/> |     |    |          |                          |                          |                   |                          |                          |        |                          |                          |             |                          |                          |           |                          |                          |            |                          |                          |                                                                                                                                                                                                                                                                                                                                                                                                                                                                                                                                                                                                                                           |        |     |    |                    |                          |                          |               |                          |                          |                  |                          |                          |       |                          |                          |         |                          |                          |
| Felt better                                                                                                           | <input type="checkbox"/>                                                                                                                                                                                                                                                                                                                                                                                                                                                                                                                                                                                                                                                                                                             | <input type="checkbox"/> |     |    |          |                          |                          |                   |                          |                          |        |                          |                          |             |                          |                          |           |                          |                          |            |                          |                          |                                                                                                                                                                                                                                                                                                                                                                                                                                                                                                                                                                                                                                           |        |     |    |                    |                          |                          |               |                          |                          |                  |                          |                          |       |                          |                          |         |                          |                          |
| Stock out                                                                                                             | <input type="checkbox"/>                                                                                                                                                                                                                                                                                                                                                                                                                                                                                                                                                                                                                                                                                                             | <input type="checkbox"/> |     |    |          |                          |                          |                   |                          |                          |        |                          |                          |             |                          |                          |           |                          |                          |            |                          |                          |                                                                                                                                                                                                                                                                                                                                                                                                                                                                                                                                                                                                                                           |        |     |    |                    |                          |                          |               |                          |                          |                  |                          |                          |       |                          |                          |         |                          |                          |
| Lost pills                                                                                                            | <input type="checkbox"/>                                                                                                                                                                                                                                                                                                                                                                                                                                                                                                                                                                                                                                                                                                             | <input type="checkbox"/> |     |    |          |                          |                          |                   |                          |                          |        |                          |                          |             |                          |                          |           |                          |                          |            |                          |                          |                                                                                                                                                                                                                                                                                                                                                                                                                                                                                                                                                                                                                                           |        |     |    |                    |                          |                          |               |                          |                          |                  |                          |                          |       |                          |                          |         |                          |                          |
| Reason                                                                                                                | Yes                                                                                                                                                                                                                                                                                                                                                                                                                                                                                                                                                                                                                                                                                                                                  | No                       |     |    |          |                          |                          |                   |                          |                          |        |                          |                          |             |                          |                          |           |                          |                          |            |                          |                          |                                                                                                                                                                                                                                                                                                                                                                                                                                                                                                                                                                                                                                           |        |     |    |                    |                          |                          |               |                          |                          |                  |                          |                          |       |                          |                          |         |                          |                          |
| Missed appointment                                                                                                    | <input type="checkbox"/>                                                                                                                                                                                                                                                                                                                                                                                                                                                                                                                                                                                                                                                                                                             | <input type="checkbox"/> |     |    |          |                          |                          |                   |                          |                          |        |                          |                          |             |                          |                          |           |                          |                          |            |                          |                          |                                                                                                                                                                                                                                                                                                                                                                                                                                                                                                                                                                                                                                           |        |     |    |                    |                          |                          |               |                          |                          |                  |                          |                          |       |                          |                          |         |                          |                          |
| Ran out of Rx                                                                                                         | <input type="checkbox"/>                                                                                                                                                                                                                                                                                                                                                                                                                                                                                                                                                                                                                                                                                                             | <input type="checkbox"/> |     |    |          |                          |                          |                   |                          |                          |        |                          |                          |             |                          |                          |           |                          |                          |            |                          |                          |                                                                                                                                                                                                                                                                                                                                                                                                                                                                                                                                                                                                                                           |        |     |    |                    |                          |                          |               |                          |                          |                  |                          |                          |       |                          |                          |         |                          |                          |
| They taste badly                                                                                                      | <input type="checkbox"/>                                                                                                                                                                                                                                                                                                                                                                                                                                                                                                                                                                                                                                                                                                             | <input type="checkbox"/> |     |    |          |                          |                          |                   |                          |                          |        |                          |                          |             |                          |                          |           |                          |                          |            |                          |                          |                                                                                                                                                                                                                                                                                                                                                                                                                                                                                                                                                                                                                                           |        |     |    |                    |                          |                          |               |                          |                          |                  |                          |                          |       |                          |                          |         |                          |                          |
| Other                                                                                                                 | <input type="checkbox"/>                                                                                                                                                                                                                                                                                                                                                                                                                                                                                                                                                                                                                                                                                                             | <input type="checkbox"/> |     |    |          |                          |                          |                   |                          |                          |        |                          |                          |             |                          |                          |           |                          |                          |            |                          |                          |                                                                                                                                                                                                                                                                                                                                                                                                                                                                                                                                                                                                                                           |        |     |    |                    |                          |                          |               |                          |                          |                  |                          |                          |       |                          |                          |         |                          |                          |
| Unknown                                                                                                               | <input type="checkbox"/>                                                                                                                                                                                                                                                                                                                                                                                                                                                                                                                                                                                                                                                                                                             | <input type="checkbox"/> |     |    |          |                          |                          |                   |                          |                          |        |                          |                          |             |                          |                          |           |                          |                          |            |                          |                          |                                                                                                                                                                                                                                                                                                                                                                                                                                                                                                                                                                                                                                           |        |     |    |                    |                          |                          |               |                          |                          |                  |                          |                          |       |                          |                          |         |                          |                          |
| 1.18a Are you on any prescribed medications?                                                                          | Yes No<br><input type="checkbox"/> <input type="checkbox"/><br><b>If yes fill the Concomitant Log</b>                                                                                                                                                                                                                                                                                                                                                                                                                                                                                                                                                                                                                                |                          |     |    |          |                          |                          |                   |                          |                          |        |                          |                          |             |                          |                          |           |                          |                          |            |                          |                          |                                                                                                                                                                                                                                                                                                                                                                                                                                                                                                                                                                                                                                           |        |     |    |                    |                          |                          |               |                          |                          |                  |                          |                          |       |                          |                          |         |                          |                          |
| 1.18b Are you on any other medication including traditional, home remedies or over the counter?                       | Yes No<br><input type="checkbox"/> <input type="checkbox"/>                                                                                                                                                                                                                                                                                                                                                                                                                                                                                                                                                                                                                                                                          |                          |     |    |          |                          |                          |                   |                          |                          |        |                          |                          |             |                          |                          |           |                          |                          |            |                          |                          |                                                                                                                                                                                                                                                                                                                                                                                                                                                                                                                                                                                                                                           |        |     |    |                    |                          |                          |               |                          |                          |                  |                          |                          |       |                          |                          |         |                          |                          |
| 1.19a Do you know what was your lowest <b>(nadir)</b> CD4+ ?<br><br>1.19b When was the count and date of nadir CD4+ ? | Yes No<br><input type="checkbox"/> <input type="checkbox"/> <b>If yes go to 1.19b</b><br><b>If no go to 2.</b><br>CD+4 Count <input type="text"/> <input type="text"/> <input type="text"/><br><b>Date</b> <input type="text"/> <input type="text"/> / <input type="text"/> <input type="text"/> <input type="text"/> <input type="text"/><br><b>(dd/mm/yyyy)</b>                                                                                                                                                                                                                                                                                                                                                                    |                          |     |    |          |                          |                          |                   |                          |                          |        |                          |                          |             |                          |                          |           |                          |                          |            |                          |                          |                                                                                                                                                                                                                                                                                                                                                                                                                                                                                                                                                                                                                                           |        |     |    |                    |                          |                          |               |                          |                          |                  |                          |                          |       |                          |                          |         |                          |                          |

## 2. LIFESTYLE AND RISK BEHAVIOURS

Now I'm going to ask you some questions about your use of alcohol, tobacco and other drugs *SINCE YOUR LAST VISIT*. I am going to ask you questions about your experiences of using these substances across your lifetime and more recently. While some of this information may be embarrassing or difficult to remember, please try and answer as truthfully as you can. Your responses are confidential and will only be recorded for research purposes.

### 2.1 Alcohol

|                                                         | 0                        | 1                        | 2                        | 3                        | 4                        |
|---------------------------------------------------------|--------------------------|--------------------------|--------------------------|--------------------------|--------------------------|
|                                                         | Never                    | Once a month or less     | 2 to 4 times a month     | 2 to 3 times a week      | 4 or more times a week   |
| 2.1.1 How often do you have a drink containing alcohol? | <input type="checkbox"/> |

→ IF 0, skip to 2.2 Smoking

2.1.2 What kind of alcohol do you usually drink? Beer/cider/alco-pop ☐ Wine/champagne/port/sherry ☐

Spirits ☐ Home-brew/traditional beer ☐

→ Tick **MULTIPLE RESPONSES** if applicable

Specify spirits \_\_\_\_\_ ↓

|                                                                                                                                                                                                                                   | 0                        | 1                        | 2                        | 3                        | 4                        |
|-----------------------------------------------------------------------------------------------------------------------------------------------------------------------------------------------------------------------------------|--------------------------|--------------------------|--------------------------|--------------------------|--------------------------|
|                                                                                                                                                                                                                                   | 1 or 2                   | 3 or 4                   | 5 or 6                   | 7 to 9                   | 10 or more               |
| 2.1.3 How many drinks containing alcohol do you have on a typical day when you are drinking?<br><br><b>A drink is defined as....</b><br><b>1 can (330 ml) beer</b><br><b>1 small glass (140 ml) wine</b><br><b>1 shot spirits</b> | <input type="checkbox"/> |
|                                                                                                                                                                                                                                   | Never                    | Less than monthly        | Monthly                  | Weekly                   | Daily or almost daily    |
| 2.1.4 How often do you have 6 or more drinks on one occasion?                                                                                                                                                                     | <input type="checkbox"/> |

|              |   |
|--------------|---|
| <b>SCORE</b> | = |
|--------------|---|

→ IF question 2.1.4 is 0, skip to 2.2 Smoking

↓For respondents who have 6 or more drinks on one occasion

|                                                                                                                                                | 0                        | 1                        | 2                             | 3                        | 4                         |
|------------------------------------------------------------------------------------------------------------------------------------------------|--------------------------|--------------------------|-------------------------------|--------------------------|---------------------------|
|                                                                                                                                                | Never                    | Less than monthly        | Monthly                       | Weekly                   | Daily or almost daily     |
| 2.1.5 How often during the last 12 months have you found that you were not able to stop drinking once you started?                             | <input type="checkbox"/> | <input type="checkbox"/> | <input type="checkbox"/>      | <input type="checkbox"/> | <input type="checkbox"/>  |
| 2.1.6 How often during the last 12 months did you fail to do what was normally expected of you because of drinking?                            | <input type="checkbox"/> | <input type="checkbox"/> | <input type="checkbox"/>      | <input type="checkbox"/> | <input type="checkbox"/>  |
| 2.1.7 How often in the last 12 months have you needed a drink first thing in the morning to get yourself going after a heavy drinking session? | <input type="checkbox"/> | <input type="checkbox"/> | <input type="checkbox"/>      | <input type="checkbox"/> | <input type="checkbox"/>  |
| 2.1.8 How often in the past 12 months have you had a feeling of guilt or remorse after drinking?                                               | <input type="checkbox"/> | <input type="checkbox"/> | <input type="checkbox"/>      | <input type="checkbox"/> | <input type="checkbox"/>  |
| 2.1.9 How often in the past 12 months have you been unable to remember what happened the night before because of your drinking?                | <input type="checkbox"/> | <input type="checkbox"/> | <input type="checkbox"/>      | <input type="checkbox"/> | <input type="checkbox"/>  |
|                                                                                                                                                | No                       |                          | Yes, but not in the last year |                          | Yes, during the last year |
| 2.1.10 Have you or someone else been injured as a result of your drinking?                                                                     | <input type="checkbox"/> |                          | <input type="checkbox"/>      |                          | <input type="checkbox"/>  |
| 2.1.11 Has a relative, friend, doctor or other health care worker been concerned about your drinking or suggested that you cut down?           | <input type="checkbox"/> |                          | <input type="checkbox"/>      |                          | <input type="checkbox"/>  |
| SCORE                                                                                                                                          |                          |                          |                               |                          | =                         |

## 2.2 Smoking

2.2.1.a Do you currently smoke cigarettes?

Yes ☐ →Specify how many per day on average

No ☐

## 2.3 Substance use

*Now, I am going to ask you some questions about your experience of using substances other than those prescribed by a doctor for medical reasons. These substances can be smoked, swallowed, inhaled, injected or taken in the form of pills. Please be assured that the information on substance use will be treated as strictly confidential. We will use this information to assist us to identify any health needs you may have.*

*These questions relate to your use of substances over the PAST 6 MONTHS*

|                                                                       | 0                        | 2                        | 3                        | 4                        | 6                        |
|-----------------------------------------------------------------------|--------------------------|--------------------------|--------------------------|--------------------------|--------------------------|
| 2.3.1 In the past 6 months, how often have you used these substances? | Never                    | Once or twice            | Monthly                  | Weekly                   | Daily or almost daily    |
| Cannabis                                                              | <input type="checkbox"/> |
| Inhalants                                                             | <input type="checkbox"/> |
| Cocaine                                                               | <input type="checkbox"/> |
| Amphetamines                                                          | <input type="checkbox"/> |
| Sedatives incl. Mandrax                                               | <input type="checkbox"/> |
| Opiates                                                               | <input type="checkbox"/> |
| Hallucinogens                                                         | <input type="checkbox"/> |
| GHB                                                                   | <input type="checkbox"/> |
| Other<br>↓Specify<br>_____                                            | <input type="checkbox"/> |
| SCORE                                                                 |                          |                          |                          |                          | =                        |

→IF **NEVER** to all items above, is **0**, skip to **2.4 Violence**

↓For respondents who report substance use in *PAST 6 MONTHS*

|                                                                                                                                                                 | <b>0</b>                                 | <b>2</b>                                             | <b>3</b>                                   | <b>4</b>                                  | <b>6</b>                                                 |
|-----------------------------------------------------------------------------------------------------------------------------------------------------------------|------------------------------------------|------------------------------------------------------|--------------------------------------------|-------------------------------------------|----------------------------------------------------------|
|                                                                                                                                                                 | <b>Never</b>                             | <b>Once a month or less</b>                          | <b>2 to 4 times a month.</b>               | <b>2 to 3 times a week.</b>               | <b>4 or more times a week.</b>                           |
| 2.3.2 Do you use more than one type of drug on the same occasion?                                                                                               | <input type="checkbox"/>                 | <input type="checkbox"/>                             | <input type="checkbox"/>                   | <input type="checkbox"/>                  | <input type="checkbox"/>                                 |
| 2.3.3 How often in the past 6 months have you had a strong desire or urge to use drugs that you found hard to resist?                                           | <b>Never</b><br><input type="checkbox"/> | <b>Less than monthly</b><br><input type="checkbox"/> | <b>Monthly</b><br><input type="checkbox"/> | <b>Weekly</b><br><input type="checkbox"/> | <b>Daily or almost daily</b><br><input type="checkbox"/> |
| 2.3.4 How often in the last 6 months has it happened that you have not been able to stop taking drugs once you started?                                         | <input type="checkbox"/>                 | <input type="checkbox"/>                             | <input type="checkbox"/>                   | <input type="checkbox"/>                  | <input type="checkbox"/>                                 |
| 2.3.5 How often in the last 6 months did you fail to do what was normally expected of you because of drug use?                                                  | <input type="checkbox"/>                 | <input type="checkbox"/>                             | <input type="checkbox"/>                   | <input type="checkbox"/>                  | <input type="checkbox"/>                                 |
| 2.3.6 How often in the last 6 months have you had to take drugs first thing in the morning to get yourself going after a heavy drug use session the day before? | <input type="checkbox"/>                 | <input type="checkbox"/>                             | <input type="checkbox"/>                   | <input type="checkbox"/>                  | <input type="checkbox"/>                                 |
| 2.3.7 How often in the past 6 months have you had a feeling of guilt or remorse after using drugs?                                                              | <input type="checkbox"/>                 | <input type="checkbox"/>                             | <input type="checkbox"/>                   | <input type="checkbox"/>                  | <input type="checkbox"/>                                 |
| <b>SCORE</b>                                                                                                                                                    |                                          |                                                      |                                            |                                           | =                                                        |

↓For respondents who report substance use in PAST 6 MONTHS

|                                                                                                                                         | Yes, during the<br>last 6 months | Yes, but not<br>in the last 6<br>months          | No                       |
|-----------------------------------------------------------------------------------------------------------------------------------------|----------------------------------|--------------------------------------------------|--------------------------|
| 2.3.8 Have you become involved in fights while under the influence of drugs?                                                            | <input type="checkbox"/>         | <input type="checkbox"/>                         | <input type="checkbox"/> |
| 2.3.9 Have you engaged in sex for money, goods or drugs in order to obtain drugs?                                                       | <input type="checkbox"/>         | <input type="checkbox"/>                         | <input type="checkbox"/> |
| 2.3.10 Have you engaged in illegal activities in order to obtain drugs?                                                                 | <input type="checkbox"/>         | <input type="checkbox"/>                         | <input type="checkbox"/> |
| 2.3.11 Have you been arrested for possession of illegal drugs?                                                                          | <input type="checkbox"/>         | <input type="checkbox"/>                         | <input type="checkbox"/> |
| 2.3.12 Have you ever had blackouts or flashbacks as a result of using drugs?                                                            | <input type="checkbox"/>         | <input type="checkbox"/>                         | <input type="checkbox"/> |
| 2.3.13 Have you ever experienced withdrawal symptoms (felt sick) when you stopped taking drugs?                                         | <input type="checkbox"/>         | <input type="checkbox"/>                         | <input type="checkbox"/> |
| 2.3.14 Have you ever had medical problems as a result of your drug use (e.g. memory loss, fits, bleeding or hepatitis)?                 | <input type="checkbox"/>         | <input type="checkbox"/>                         | <input type="checkbox"/> |
| 2.3.15 Have you or someone else been mentally or physically hurt because you used drugs?                                                | <input type="checkbox"/>         | <input type="checkbox"/>                         | <input type="checkbox"/> |
| 2.3.16 Has a relative, friend, doctor or other health care worker been concerned about your drug use or suggested that you should stop? | <input type="checkbox"/>         | <input type="checkbox"/>                         | <input type="checkbox"/> |
| 2.3.17.a Have you ever injected drugs?                                                                                                  | <input type="checkbox"/>         | <input type="checkbox"/>                         | <input type="checkbox"/> |
| →2.3.17.b IF <b>YES</b> , how often did you inject drugs in the past 6 months?                                                          |                                  | Once weekly or less <input type="checkbox"/>     |                          |
|                                                                                                                                         |                                  | More than once per week <input type="checkbox"/> |                          |

## 2.4 Violence

*You are doing really well and we are about three-quarters of the way through the interview. The information you have given us is very important.*

*There are now a few more questions about your experiences growing up, and your relationships with others. Some men find these questions hard to talk about, others find it easy. Remember that everything you share here will only be used for research purposes and will be kept strictly secret. We have not written down your name anywhere and what you say in this interview cannot be linked to you in any way, but it **WILL** help us a lot in understanding the lives of men in South Africa.*

|                                                                                                                                                                   | <b>Never</b>             | <b>Once</b>              | <b>More than once</b>    |
|-------------------------------------------------------------------------------------------------------------------------------------------------------------------|--------------------------|--------------------------|--------------------------|
| 2.4.1 While you were growing up, how often did someone in your household push, grab, shove, throw something, slap, hit, kick or punch you?                        | <input type="checkbox"/> | <input type="checkbox"/> | <input type="checkbox"/> |
| 2.4.2 While you were growing up, how often did your parents or the people who raised you push, grab, shove, throw something, slap, hit, kick or punch each other? | <input type="checkbox"/> | <input type="checkbox"/> | <input type="checkbox"/> |

→Go to 3. SEXUAL BEHAVIOUR AND PRACTICES

### 3. SEXUAL BEHAVIOUR AND PRACTICES

*I'd now like to ask you about your sexual partners and practices. While some of this information may be embarrassing or difficult to remember, please try and answer as truthfully as you can.*

3.1.1.a How many sexual partners have you had  partners  
in the past 6 months?

→3.1.1.b IF >1 **partner**, did you have a relationship with more than one person at the same time during the last 6 months? Yes ☐ No ☐

3.1.2. Some men have sex with other men. Have you had sex with another man in the last 6 months? Yes ☐ No ☐

3.1.3 Do you identify yourself as? Heterosexual/Straight ☐ Homosexual/Gay ☐  
Bisexual ☐  
Other ☐ → Specify \_\_\_\_\_

#### 3.2 Partners

*I'd like to know more about ANY NEW sexual partner SINCE YOUR LAST VISIT, up to a maximum of 3 partners starting with your most recent sexual partner.*

*For these questions, sex is defined as any vaginal or anal sex that is where a man inserts his penis into the vagina or anus. A sexual partner is someone with whom you have had sex either regularly or only once.*

##### 3.2.1 Most recent **NEW** partner

3.2.1.a How old is this person? Years

3.2.1.b Is this person male or female? Female ☐ Male ☐

3.2.1.c How would you characterise your relationship with this person? Main partner ☐ Regular partner ☐  
Occasional partner ☐

**Main partner** = person you regularly have sex with  
AND married to/living with

**Regular partner** = person you regularly have sex  
with but not married/not living  
together

**Occasional partner** = person you had sex with once  
or twice

3.2.1.d Is this person a new partner, i.e. someone that you had sex with for the first time in the past 3 months? Yes ☐ No ☐

|                                                                                                                                                 |                                                                                                                                                                                                                                                                                                                                                                                                                      |                                                                                                                                                                                                                                                              |
|-------------------------------------------------------------------------------------------------------------------------------------------------|----------------------------------------------------------------------------------------------------------------------------------------------------------------------------------------------------------------------------------------------------------------------------------------------------------------------------------------------------------------------------------------------------------------------|--------------------------------------------------------------------------------------------------------------------------------------------------------------------------------------------------------------------------------------------------------------|
| 3.2.1.e Is this partner a recent immigrant to South Africa (i.e. arrived within the last 3 years)?                                              | Yes <input type="checkbox"/>                                                                                                                                                                                                                                                                                                                                                                                         | No <input type="checkbox"/>                                                                                                                                                                                                                                  |
|                                                                                                                                                 | Don't know <input type="checkbox"/>                                                                                                                                                                                                                                                                                                                                                                                  |                                                                                                                                                                                                                                                              |
| 3.2.1.f Has this person ever tested positive for HIV?                                                                                           | Yes <input type="checkbox"/>                                                                                                                                                                                                                                                                                                                                                                                         | No <input type="checkbox"/>                                                                                                                                                                                                                                  |
|                                                                                                                                                 | Don't know <input type="checkbox"/>                                                                                                                                                                                                                                                                                                                                                                                  |                                                                                                                                                                                                                                                              |
| 3.2.1.g How long did you know this person before you first had sex with them?                                                                   | Minutes <input type="text"/> <input type="text"/><br>Hours <input type="text"/> <input type="text"/><br>Weeks <input type="text"/> <input type="text"/>                                                                                                                                                                                                                                                              | Months <input type="text"/> <input type="text"/><br>Years <input type="text"/> <input type="text"/>                                                                                                                                                          |
| 3.2.1.h During the last 3 months, how many times did you have sex with this partner?                                                            | No. of times <input type="text"/> <input type="text"/> <input type="text"/>                                                                                                                                                                                                                                                                                                                                          |                                                                                                                                                                                                                                                              |
| 3.2.1.i How often did you use a condom when you had sex?                                                                                        | Always <input type="checkbox"/><br>>/= to half the time <input type="checkbox"/>                                                                                                                                                                                                                                                                                                                                     | < half the time <input type="checkbox"/><br>Never <input type="checkbox"/>                                                                                                                                                                                   |
| 3.2.1.j Did you drink alcohol the last time that you had sex with this partner (either during sex or up to two hours before you had sex)?       | Yes <input type="checkbox"/>                                                                                                                                                                                                                                                                                                                                                                                         | No <input type="checkbox"/>                                                                                                                                                                                                                                  |
| 3.2.1.k Did this partner give you or receive from you money, drugs, food or a place to stay in exchange for sex the last time that you had sex? | Yes <input type="checkbox"/>                                                                                                                                                                                                                                                                                                                                                                                         | No <input type="checkbox"/>                                                                                                                                                                                                                                  |
| 3.2.1.l What type of sex did you have with this person?<br><br><b>→ MULTIPLE RESPONSES possible</b>                                             | <b>Type of Sex Yes No</b><br>Oral received <input type="checkbox"/> <input type="checkbox"/><br>Oral performed <input type="checkbox"/> <input type="checkbox"/><br>Vaginal <input type="checkbox"/> <input type="checkbox"/><br>Receptive insertion of digits in anus <input type="checkbox"/> <input type="checkbox"/><br>Receptive insertion of objects in anus <input type="checkbox"/> <input type="checkbox"/> | <b>Type of Sex Yes No</b><br>Anal receptive <input type="checkbox"/> <input type="checkbox"/><br>Anal insertive <input type="checkbox"/> <input type="checkbox"/><br>Rimming received <input type="checkbox"/><br>Rimming performed <input type="checkbox"/> |
| 3.2.1.m Do you know or suspect that this person has other sexual partners?                                                                      | Yes <input type="checkbox"/>                                                                                                                                                                                                                                                                                                                                                                                         | No <input type="checkbox"/>                                                                                                                                                                                                                                  |
| 3.2.1.n Did you have sex with any other partners in the past 3 months?                                                                          | Yes <input type="checkbox"/>                                                                                                                                                                                                                                                                                                                                                                                         | No <input type="checkbox"/>                                                                                                                                                                                                                                  |
| ↓IF NO, go to <b>8. Genital Hygiene Practices</b>                                                                                               |                                                                                                                                                                                                                                                                                                                                                                                                                      |                                                                                                                                                                                                                                                              |
| <b>3.2.2 Second most recent partner in past 6 months</b>                                                                                        |                                                                                                                                                                                                                                                                                                                                                                                                                      |                                                                                                                                                                                                                                                              |
| 3.2.2.a How old is this person?                                                                                                                 | Years <input type="text"/> <input type="text"/>                                                                                                                                                                                                                                                                                                                                                                      |                                                                                                                                                                                                                                                              |

|                                                                                                                                                                                                                                                                                                                                                   |                                                                                                                                                                                                                               |                                                                                                                                                                   |
|---------------------------------------------------------------------------------------------------------------------------------------------------------------------------------------------------------------------------------------------------------------------------------------------------------------------------------------------------|-------------------------------------------------------------------------------------------------------------------------------------------------------------------------------------------------------------------------------|-------------------------------------------------------------------------------------------------------------------------------------------------------------------|
| 3.2.2.b Is this person male or female?                                                                                                                                                                                                                                                                                                            | Female <input type="checkbox"/>                                                                                                                                                                                               | Male <input type="checkbox"/>                                                                                                                                     |
| 3.2.2.c How would you characterise your relationship with this person?<br><br><b>Main partner</b> = person you regularly have sex with AND married to/living with<br><br><b>Regular partner</b> = person you regularly have sex with but not married/not living together<br><br><b>Occasional partner</b> = person you had sex with once or twice | Main partner <input type="checkbox"/><br>Occasional partner <input type="checkbox"/>                                                                                                                                          | Regular partner <input type="checkbox"/>                                                                                                                          |
| 3.2.2.d Is this person a new partner, i.e. someone that you had sex with for the first time in the past 3 months?                                                                                                                                                                                                                                 | Yes <input type="checkbox"/>                                                                                                                                                                                                  | No <input type="checkbox"/>                                                                                                                                       |
| 3.2.2.e Is this partner a recent immigrant to South Africa (i.e. arrived within the last 3 years)?                                                                                                                                                                                                                                                | Yes <input type="checkbox"/><br>Don't know <input type="checkbox"/>                                                                                                                                                           | No <input type="checkbox"/>                                                                                                                                       |
| 3.2.2.f Has this person ever tested positive for HIV?                                                                                                                                                                                                                                                                                             | Yes <input type="checkbox"/><br>Don't know <input type="checkbox"/>                                                                                                                                                           | No <input type="checkbox"/>                                                                                                                                       |
| 3.2.2.g How long did you know this person before you first had sex with them?                                                                                                                                                                                                                                                                     | Minutes <input type="checkbox"/> <input type="checkbox"/><br>Hours <input type="checkbox"/> <input type="checkbox"/><br>Weeks <input type="checkbox"/> <input type="checkbox"/>                                               | Months <input type="checkbox"/> <input type="checkbox"/><br>Years <input type="checkbox"/> <input type="checkbox"/>                                               |
| 3.2.2.h During the last 3 months, how many times did you have sex with this partner?                                                                                                                                                                                                                                                              | No. of times <input type="checkbox"/> <input type="checkbox"/>                                                                                                                                                                |                                                                                                                                                                   |
| 3.2.2.i How often did you use a condom when you had sex?                                                                                                                                                                                                                                                                                          | Always <input type="checkbox"/><br>>/= to half the time <input type="checkbox"/>                                                                                                                                              | < half the time <input type="checkbox"/><br>Never <input type="checkbox"/>                                                                                        |
| 3.2.2.j Did you drink alcohol the last time that you had sex with this partner – either during sex or up to two hours before you had sex?                                                                                                                                                                                                         | Yes <input type="checkbox"/>                                                                                                                                                                                                  | No <input type="checkbox"/>                                                                                                                                       |
| 3.2.2.k Did this partner give you or receive from you money, drugs, food or a place to stay in exchange for sex the last time that you had sex?                                                                                                                                                                                                   | Yes <input type="checkbox"/>                                                                                                                                                                                                  | No <input type="checkbox"/>                                                                                                                                       |
| 3.2.2.l What type of sex did you have with this person?<br><br>→ <b>MULTIPLE RESPONSES</b> possible                                                                                                                                                                                                                                               | <b>Type of Sex Yes No</b><br>Oral received <input type="checkbox"/> <input type="checkbox"/><br>Oral performed <input type="checkbox"/> <input type="checkbox"/><br>Vaginal <input type="checkbox"/> <input type="checkbox"/> | <b>Type of sex Yes No</b><br>Anal receptive <input type="checkbox"/> <input type="checkbox"/><br>Anal insertive <input type="checkbox"/> <input type="checkbox"/> |

|                                                                                                                                                                                                                                                                            |                                                                                                                                                         |                                                                                                     |
|----------------------------------------------------------------------------------------------------------------------------------------------------------------------------------------------------------------------------------------------------------------------------|---------------------------------------------------------------------------------------------------------------------------------------------------------|-----------------------------------------------------------------------------------------------------|
| 3.2.2.m Do you know or suspect that this person has other sexual partners?                                                                                                                                                                                                 | Yes <input type="checkbox"/>                                                                                                                            | No <input type="checkbox"/>                                                                         |
| 3.2.2.n Did you have sex with any other partners in the past 3 months?                                                                                                                                                                                                     | Yes <input type="checkbox"/>                                                                                                                            | No <input type="checkbox"/>                                                                         |
| →IF NO, go to<br><b>4.Genital Hygiene Practices</b>                                                                                                                                                                                                                        |                                                                                                                                                         |                                                                                                     |
| <b>3.2.3 Third most recent partner in past 6 months</b>                                                                                                                                                                                                                    |                                                                                                                                                         |                                                                                                     |
| 3.2.3.a How old is this person?                                                                                                                                                                                                                                            | Years <input type="text"/> <input type="text"/>                                                                                                         |                                                                                                     |
| 3.2.3.b Is this person male or female?                                                                                                                                                                                                                                     | Female <input type="checkbox"/>                                                                                                                         | Male <input type="checkbox"/>                                                                       |
| 3.2.3.c How would you characterise your relationship with this person?                                                                                                                                                                                                     | Main partner <input type="checkbox"/><br>Occasional partner <input type="checkbox"/>                                                                    | Regular partner <input type="checkbox"/>                                                            |
| <p><b>Main partner</b> = person you regularly have sex with AND married to/living with</p> <p><b>Regular partner</b> = person you regularly have sex with but not married/not living together</p> <p><b>Occasional partner</b> = person you had sex with once or twice</p> |                                                                                                                                                         |                                                                                                     |
| 3.2.3.d Is this person a new partner, i.e. someone that you had sex with for the first time in the past 6 months?                                                                                                                                                          | Yes <input type="checkbox"/>                                                                                                                            | No <input type="checkbox"/>                                                                         |
| 3.2.3.e Is this partner a recent immigrant to South Africa (i.e. arrived within the last 6 years)?                                                                                                                                                                         | Yes <input type="checkbox"/><br>Don't know <input type="checkbox"/>                                                                                     | No <input type="checkbox"/>                                                                         |
| 3.2.3.f Has this person ever tested positive for HIV?                                                                                                                                                                                                                      | Yes <input type="checkbox"/><br>Don't know <input type="checkbox"/>                                                                                     | No <input type="checkbox"/>                                                                         |
| 3.2.3.g How long did you know this person before you first had sex with them?                                                                                                                                                                                              | Minutes <input type="text"/> <input type="text"/><br>Hours <input type="text"/> <input type="text"/><br>Weeks <input type="text"/> <input type="text"/> | Months <input type="text"/> <input type="text"/><br>Years <input type="text"/> <input type="text"/> |
| 3.2.3.h During the last 36months, how many times did you have sex with this partner?                                                                                                                                                                                       | No. of times <input type="text"/> <input type="text"/>                                                                                                  |                                                                                                     |
| 3.2.3.i How often did you use a condom when you had sex?                                                                                                                                                                                                                   | Always <input type="checkbox"/><br>>/= to half the time <input type="checkbox"/>                                                                        | < half the time <input type="checkbox"/><br>Never <input type="checkbox"/>                          |

|                                                                                                                                                                                                                                                                                                                                                                                                                                                                                                                                                                                                                                                                                                                                                                                                                                                                                                                                                                                                                                                                                                                                                                                                                                                                                              |                                                   |                             |                                                   |        |             |        |               |                                                   |                |                                                   |                |                                                   |                |                                                   |         |                                                   |  |  |
|----------------------------------------------------------------------------------------------------------------------------------------------------------------------------------------------------------------------------------------------------------------------------------------------------------------------------------------------------------------------------------------------------------------------------------------------------------------------------------------------------------------------------------------------------------------------------------------------------------------------------------------------------------------------------------------------------------------------------------------------------------------------------------------------------------------------------------------------------------------------------------------------------------------------------------------------------------------------------------------------------------------------------------------------------------------------------------------------------------------------------------------------------------------------------------------------------------------------------------------------------------------------------------------------|---------------------------------------------------|-----------------------------|---------------------------------------------------|--------|-------------|--------|---------------|---------------------------------------------------|----------------|---------------------------------------------------|----------------|---------------------------------------------------|----------------|---------------------------------------------------|---------|---------------------------------------------------|--|--|
| 3.2.3.j Did you drink alcohol the last time that you had sex with this partner – either during sex or up to two hours before you had sex?                                                                                                                                                                                                                                                                                                                                                                                                                                                                                                                                                                                                                                                                                                                                                                                                                                                                                                                                                                                                                                                                                                                                                    | Yes <input type="checkbox"/>                      | No <input type="checkbox"/> |                                                   |        |             |        |               |                                                   |                |                                                   |                |                                                   |                |                                                   |         |                                                   |  |  |
| 3.2.3.k Did this partner give you or receive from you money, drugs, food or a place to stay in exchange for sex the last time that you had sex?                                                                                                                                                                                                                                                                                                                                                                                                                                                                                                                                                                                                                                                                                                                                                                                                                                                                                                                                                                                                                                                                                                                                              | Yes <input type="checkbox"/>                      | No <input type="checkbox"/> |                                                   |        |             |        |               |                                                   |                |                                                   |                |                                                   |                |                                                   |         |                                                   |  |  |
| 3.2.3.l What type of sex did you have with this person?<br><br><div style="display: flex; justify-content: space-between;"> <div style="width: 45%;"> <p>→ <b>MULTIPLERESPONSES</b> possible</p> </div> <div style="width: 50%;"> <table style="width: 100%; border: none;"> <tr> <td style="text-align: right; padding-right: 10px;">Type of sex</td> <td style="text-align: left;">Yes No</td> <td style="text-align: right; padding-right: 10px;">Type of Sex</td> <td style="text-align: left;">Yes No</td> </tr> <tr> <td style="text-align: right;">Oral received</td> <td style="text-align: left;"><input type="checkbox"/><input type="checkbox"/></td> <td style="text-align: right;">Anal receptive</td> <td style="text-align: left;"><input type="checkbox"/><input type="checkbox"/></td> </tr> <tr> <td style="text-align: right;">Oral performed</td> <td style="text-align: left;"><input type="checkbox"/><input type="checkbox"/></td> <td style="text-align: right;">Anal insertive</td> <td style="text-align: left;"><input type="checkbox"/><input type="checkbox"/></td> </tr> <tr> <td style="text-align: right;">Vaginal</td> <td style="text-align: left;"><input type="checkbox"/><input type="checkbox"/></td> <td></td> <td></td> </tr> </table> </div> </div> |                                                   |                             | Type of sex                                       | Yes No | Type of Sex | Yes No | Oral received | <input type="checkbox"/> <input type="checkbox"/> | Anal receptive | <input type="checkbox"/> <input type="checkbox"/> | Oral performed | <input type="checkbox"/> <input type="checkbox"/> | Anal insertive | <input type="checkbox"/> <input type="checkbox"/> | Vaginal | <input type="checkbox"/> <input type="checkbox"/> |  |  |
| Type of sex                                                                                                                                                                                                                                                                                                                                                                                                                                                                                                                                                                                                                                                                                                                                                                                                                                                                                                                                                                                                                                                                                                                                                                                                                                                                                  | Yes No                                            | Type of Sex                 | Yes No                                            |        |             |        |               |                                                   |                |                                                   |                |                                                   |                |                                                   |         |                                                   |  |  |
| Oral received                                                                                                                                                                                                                                                                                                                                                                                                                                                                                                                                                                                                                                                                                                                                                                                                                                                                                                                                                                                                                                                                                                                                                                                                                                                                                | <input type="checkbox"/> <input type="checkbox"/> | Anal receptive              | <input type="checkbox"/> <input type="checkbox"/> |        |             |        |               |                                                   |                |                                                   |                |                                                   |                |                                                   |         |                                                   |  |  |
| Oral performed                                                                                                                                                                                                                                                                                                                                                                                                                                                                                                                                                                                                                                                                                                                                                                                                                                                                                                                                                                                                                                                                                                                                                                                                                                                                               | <input type="checkbox"/> <input type="checkbox"/> | Anal insertive              | <input type="checkbox"/> <input type="checkbox"/> |        |             |        |               |                                                   |                |                                                   |                |                                                   |                |                                                   |         |                                                   |  |  |
| Vaginal                                                                                                                                                                                                                                                                                                                                                                                                                                                                                                                                                                                                                                                                                                                                                                                                                                                                                                                                                                                                                                                                                                                                                                                                                                                                                      | <input type="checkbox"/> <input type="checkbox"/> |                             |                                                   |        |             |        |               |                                                   |                |                                                   |                |                                                   |                |                                                   |         |                                                   |  |  |
| 3.2.3.m Do you know or suspect that this person has other sexual partners?                                                                                                                                                                                                                                                                                                                                                                                                                                                                                                                                                                                                                                                                                                                                                                                                                                                                                                                                                                                                                                                                                                                                                                                                                   | Yes <input type="checkbox"/>                      | No <input type="checkbox"/> |                                                   |        |             |        |               |                                                   |                |                                                   |                |                                                   |                |                                                   |         |                                                   |  |  |

→Go to 4. GENITAL HYGIENE PRACTICES

|                                                                                                                                                                                                                 |                                                                        |                                                                            |                                               |
|-----------------------------------------------------------------------------------------------------------------------------------------------------------------------------------------------------------------|------------------------------------------------------------------------|----------------------------------------------------------------------------|-----------------------------------------------|
| <b>4. GENITAL HYGIENE PRACTICES</b>                                                                                                                                                                             |                                                                        |                                                                            |                                               |
| <i>Now I'm going to ask you some questions about your personal hygiene practices. While some of these questions may be embarrassing or difficult to answer, please try and answer as truthfully as you can.</i> |                                                                        |                                                                            |                                               |
| 4.1.a Are you circumcised?                                                                                                                                                                                      | Yes <input type="checkbox"/>                                           | → Age of circumcision <input type="text"/> <input type="text"/>            | No <input type="checkbox"/>                   |
| →4.1.b Where were you circumcised?                                                                                                                                                                              | Traditional initiation school <input type="checkbox"/>                 | Other religious setting <input type="checkbox"/>                           | Health care facility <input type="checkbox"/> |
|                                                                                                                                                                                                                 |                                                                        | Don't know <input type="checkbox"/>                                        |                                               |
| 4.2.a Do you clean your penis before and/or after you have sex?                                                                                                                                                 | Yes, before sex <input type="checkbox"/>                               |                                                                            |                                               |
|                                                                                                                                                                                                                 | Yes, before and after sex <input type="checkbox"/>                     |                                                                            |                                               |
|                                                                                                                                                                                                                 | Yes, after sex <input type="checkbox"/>                                |                                                                            |                                               |
|                                                                                                                                                                                                                 | No <input type="checkbox"/>                                            | →IF <b>NO</b> , go to 4.4.a                                                |                                               |
| →4.2.b IF <b>YES</b> , what do you use to clean your penis before and/or after sex?                                                                                                                             | <b>Substances Yes No</b>                                               | <b>Substances Yes No</b>                                                   |                                               |
|                                                                                                                                                                                                                 | Water <input type="checkbox"/> <input type="checkbox"/>                | Other household products <input type="checkbox"/> <input type="checkbox"/> |                                               |
| →Tick <b>MULTIPLE RESPONSES</b> if applicable                                                                                                                                                                   | Water and soap <input type="checkbox"/> <input type="checkbox"/>       | Cloth/towel to wipe <input type="checkbox"/> <input type="checkbox"/>      |                                               |
|                                                                                                                                                                                                                 | Imbiza/herbs/powders <input type="checkbox"/> <input type="checkbox"/> |                                                                            |                                               |
| 4.3 How often do you clean your penis at the time of sex?                                                                                                                                                       | Always <input type="checkbox"/>                                        |                                                                            |                                               |
|                                                                                                                                                                                                                 | More than half of sex acts <input type="checkbox"/>                    |                                                                            |                                               |
|                                                                                                                                                                                                                 | Less than half of sex acts <input type="checkbox"/>                    |                                                                            |                                               |
| 4.4.a Did you use any substances to enhance your sexual performance?                                                                                                                                            | Yes <input type="checkbox"/>                                           | No <input type="checkbox"/>                                                |                                               |
| →7.4.bIF <b>YES</b> , what products did you use to enhance your sexual performance?                                                                                                                             | Substances taken orally <input type="checkbox"/>                       | Substances applied to penis <input type="checkbox"/>                       |                                               |
|                                                                                                                                                                                                                 | Pills <input type="checkbox"/>                                         |                                                                            |                                               |
| (Substances: Imbiza/muti/herbs/powders)                                                                                                                                                                         | Other <input type="checkbox"/>                                         | →Specify _____                                                             |                                               |
| 4.5 Do you know whether your sexual partner/s use products other than water to clean or tighten his/her genital area before and/or after sex?                                                                   | Yes <input type="checkbox"/>                                           | No <input type="checkbox"/>                                                |                                               |
|                                                                                                                                                                                                                 | Don't know <input type="checkbox"/>                                    |                                                                            |                                               |

→Go to 5.

## 5. SEXUAL HEALTH HISTORY

5.1 Have you ever had a sexually transmitted infection? Yes ☐ No ☐  
Don't know ☐

5.2 In the last 6 months, has a health care provider other than someone from the study, diagnosed you with or treated you for any of the following sexually transmitted or genital infections:

|                                                                                | Yes                      | No                       | Don't know               |
|--------------------------------------------------------------------------------|--------------------------|--------------------------|--------------------------|
| Burning urine or discharge from the penis                                      | <input type="checkbox"/> | <input type="checkbox"/> | <input type="checkbox"/> |
| Genital ulcer disease (including genital herpes)                               | <input type="checkbox"/> | <input type="checkbox"/> | <input type="checkbox"/> |
| Swollen glands in the groin (Bubo)                                             | <input type="checkbox"/> | <input type="checkbox"/> | <input type="checkbox"/> |
| Pain or swelling of testicles                                                  | <input type="checkbox"/> | <input type="checkbox"/> | <input type="checkbox"/> |
| Genital warts                                                                  | <input type="checkbox"/> | <input type="checkbox"/> | <input type="checkbox"/> |
| NA <input type="checkbox"/> For <b>MSM</b> : Pain or discharge from the rectum | <input type="checkbox"/> | <input type="checkbox"/> | <input type="checkbox"/> |
| Syphilis (by serological test)                                                 | <input type="checkbox"/> | <input type="checkbox"/> | <input type="checkbox"/> |

5.3 Were you diagnosed with a sexually transmitted infection but don't know the name or it is not listed above? Yes ☐ → Details \_\_\_\_\_  
No ☐  
Don't know ☐

5.4 Were you given treatment because your partner had a sexually transmitted infection? Yes ☐ No ☐  
Don't know ☐

5.5 Have you sought care from anywhere other than a government clinic in the past 6 months? Yes ☐ → Details \_\_\_\_\_  
No ☐ → Go to Question 5.6

5.6 IF you received treatment, did you:

→5.6.a Complete your treatment as prescribed? Yes ☐ No ☐

→5.6.b Have sex while taking treatment? Yes ☐ No ☐

→5.6.c IF **you had sex while taking treatment**, did you use a condom for every sex act?  
Yes ☐ No ☐

→5.6.d Were all your partners treated? Yes ☐ No ☐  
Don't know ☐ Not applicable ☐

→5.6.e Do you still have any genital symptoms? Yes ☐ No ☐  
Not applicable ☐

| 5.7 In the past 7 days, have you experienced:                                        |                                                    | Yes                      | No                       | Don't Know               |
|--------------------------------------------------------------------------------------|----------------------------------------------------|--------------------------|--------------------------|--------------------------|
|                                                                                      | Burning urine or discharge from the penis          | <input type="checkbox"/> | <input type="checkbox"/> | <input type="checkbox"/> |
|                                                                                      | Blisters or sores in the genital area              | <input type="checkbox"/> | <input type="checkbox"/> | <input type="checkbox"/> |
|                                                                                      | Swollen glands in the groin (Bubo)                 | <input type="checkbox"/> | <input type="checkbox"/> | <input type="checkbox"/> |
|                                                                                      | Pain or swelling of testicles                      | <input type="checkbox"/> | <input type="checkbox"/> | <input type="checkbox"/> |
|                                                                                      | Genital warts                                      | <input type="checkbox"/> | <input type="checkbox"/> | <input type="checkbox"/> |
| NA<br><input type="checkbox"/>                                                       | For <b>MSM</b> : Pain or discharge from the rectum | <input type="checkbox"/> | <input type="checkbox"/> | <input type="checkbox"/> |
| 5.8 In the past 7 days have you been given treatment because your partner has an STI |                                                    | <input type="checkbox"/> | <input type="checkbox"/> | <input type="checkbox"/> |

→Go to 6. PHYSICAL EXAMINATION

|                                              |                                      |                                                                               |                          |                                                                                                       |                                                                                                                                                                     |
|----------------------------------------------|--------------------------------------|-------------------------------------------------------------------------------|--------------------------|-------------------------------------------------------------------------------------------------------|---------------------------------------------------------------------------------------------------------------------------------------------------------------------|
| <b>6. PHYSICAL EXAMINATION</b>               |                                      |                                                                               |                          |                                                                                                       |                                                                                                                                                                     |
| 6.1 Body Temperature                         |                                      | <input type="text"/> <input type="text"/> <input type="text"/> °C             |                          |                                                                                                       |                                                                                                                                                                     |
| 6.2 Weight                                   |                                      | <input type="text"/> <input type="text"/> <input type="text"/> kilograms      |                          |                                                                                                       |                                                                                                                                                                     |
| 6.3 Heart Rate                               |                                      | <input type="text"/> <input type="text"/> <input type="text"/> per minute     |                          |                                                                                                       |                                                                                                                                                                     |
| 6.4 Blood Pressure                           |                                      | Systolic: <input type="text"/> <input type="text"/> <input type="text"/> mmHg |                          | Diastolic: <input type="text"/> <input type="text"/> <input type="text"/> mmHg                        |                                                                                                                                                                     |
| <b>6.5 Body system or Part Observations</b>  |                                      | <b>Not Examined</b>                                                           | <b>Normal</b>            | <b>Abnormal</b>                                                                                       | <b>→IF ABNORMAL, details below:</b>                                                                                                                                 |
| a.                                           | Skin and mucous membranes            | <input type="checkbox"/>                                                      | <input type="checkbox"/> | <input type="checkbox"/>                                                                              | <input type="text"/>                                                                                                                                                |
| b.                                           | Head and neck                        | <input type="checkbox"/>                                                      | <input type="checkbox"/> | <input type="checkbox"/>                                                                              | <input type="text"/>                                                                                                                                                |
| c.                                           | Cardiovascular                       | <input type="checkbox"/>                                                      | <input type="checkbox"/> | <input type="checkbox"/>                                                                              | <input type="text"/>                                                                                                                                                |
| d.                                           | Respiratory                          | <input type="checkbox"/>                                                      | <input type="checkbox"/> | <input type="checkbox"/>                                                                              | <input type="text"/>                                                                                                                                                |
| e.                                           | Gastrointestinal (abdominal & liver) | <input type="checkbox"/>                                                      | <input type="checkbox"/> | <input type="checkbox"/>                                                                              | <input type="text"/>                                                                                                                                                |
| f.                                           | Neurological                         | <input type="checkbox"/>                                                      | <input type="checkbox"/> | <input type="checkbox"/>                                                                              | <input type="text"/>                                                                                                                                                |
| g.                                           | Genital                              | <input type="checkbox"/>                                                      | <input type="checkbox"/> | <input type="checkbox"/>                                                                              | (see below)                                                                                                                                                         |
| <b>6.6. Genital Examination Observations</b> |                                      | <b>Not Examined</b>                                                           | <b>No</b>                | <b>Yes</b>                                                                                            | <b>→IF YES details below:</b>                                                                                                                                       |
| a.                                           | Is participant circumcised?          | <input type="checkbox"/>                                                      | <input type="checkbox"/> | <input type="checkbox"/>                                                                              | Partial <input type="checkbox"/> Full <input type="checkbox"/>                                                                                                      |
| b.                                           | Inguinal lymphadenopathy?            | <input type="checkbox"/>                                                      | <input type="checkbox"/> | <input type="checkbox"/>                                                                              | Single <input type="checkbox"/> Multiple <input type="checkbox"/><br>Bubo <input type="checkbox"/>                                                                  |
| c.                                           | Balanitis?                           | <input type="checkbox"/>                                                      | <input type="checkbox"/> | <input type="checkbox"/>                                                                              |                                                                                                                                                                     |
| d.                                           | Discharge?                           | <input type="checkbox"/>                                                      | <input type="checkbox"/> | <input type="checkbox"/>                                                                              | <b>Site Yes No</b><br>Meatal <input type="checkbox"/> <input type="checkbox"/> <b>Site Yes No</b><br>Subpreputial <input type="checkbox"/> <input type="checkbox"/> |
| e.                                           | Ulcers?                              | <input type="checkbox"/>                                                      | <input type="checkbox"/> | <input type="checkbox"/>                                                                              |                                                                                                                                                                     |
|                                              | IF YES,                              | → Ulcer Number:                                                               |                          | Single <input type="checkbox"/>                                                                       | Multiple <input type="checkbox"/>                                                                                                                                   |
|                                              |                                      | → Ulcer Location (Tick multiple locations if applicable):                     |                          | Prepuce <input type="checkbox"/> Glans <input type="checkbox"/> Shaft <input type="checkbox"/>        |                                                                                                                                                                     |
|                                              |                                      |                                                                               |                          | Inguinal <input type="checkbox"/> Buttocks <input type="checkbox"/> Perianal <input type="checkbox"/> |                                                                                                                                                                     |
|                                              |                                      |                                                                               |                          |                                                                                                       | Other <input type="checkbox"/>                                                                                                                                      |

|                                                                                                                                                                                    |  |                                                                                |  |                              |                             |
|------------------------------------------------------------------------------------------------------------------------------------------------------------------------------------|--|--------------------------------------------------------------------------------|--|------------------------------|-----------------------------|
| <b>If there are Ulcers and participant has consented,</b>                                                                                                                          |  | → Ulcer Pain:                                                                  |  | Yes <input type="checkbox"/> | No <input type="checkbox"/> |
|                                                                                                                                                                                    |  | → Ulcer Bleeding:                                                              |  | Yes <input type="checkbox"/> | No <input type="checkbox"/> |
| <div> <div>f.</div> <div> <div>Single <input type="checkbox"/></div> <div>Multiple <input type="checkbox"/></div> </div> </div>                                                    |  |                                                                                |  |                              |                             |
| Warts? <div> <input type="checkbox"/> <input type="checkbox"/> <input type="checkbox"/> </div>                                                                                     |  | Location:_____ <div> <b>If there are warts and consent take a photo</b> </div> |  |                              |                             |
| <div> <div>g.</div> <div> <div>Peri-anal abnormalities?</div> <div> <input type="checkbox"/> <input type="checkbox"/> <input type="checkbox"/> </div> </div> </div>                |  |                                                                                |  |                              |                             |
|                                                                                                                                                                                    |  | Details,_____ <div> <b>If yes and consent take a photo</b> </div>              |  |                              |                             |
| <div> <div>h.</div> <div> <div>Other genital abnormality or deformity?</div> <div> <input type="checkbox"/> <input type="checkbox"/> <input type="checkbox"/> </div> </div> </div> |  |                                                                                |  |                              |                             |
|                                                                                                                                                                                    |  | Details,_____ <div> <b>If yes and consent take a photo</b> </div>              |  |                              |                             |

→Go to 7. LABORATORY SAMPLE COLLECTION

|                                  |                                                                        |
|----------------------------------|------------------------------------------------------------------------|
| <b>7. Samples collected</b>      |                                                                        |
| <b>Blood samples</b>             |                                                                        |
| <b>HIV PVL</b>                   | <b>Yes</b> <input type="checkbox"/> <b>No</b> <input type="checkbox"/> |
| <b>CD4+ cell count</b>           | <b>Yes</b> <input type="checkbox"/> <b>No</b> <input type="checkbox"/> |
| <b>HBsAntigen</b>                | <b>Yes</b> <input type="checkbox"/> <b>No</b> <input type="checkbox"/> |
| <b>Syphilis serology:</b>        |                                                                        |
| <b>RPR</b>                       | <b>Yes</b> <input type="checkbox"/> <b>No</b> <input type="checkbox"/> |
| <b>TPHA</b>                      | <b>Yes</b> <input type="checkbox"/> <b>No</b> <input type="checkbox"/> |
| <b>HSV – 2 serology</b>          | <b>Yes</b> <input type="checkbox"/> <b>No</b> <input type="checkbox"/> |
| <b>HPV serology</b>              | <b>Yes</b> <input type="checkbox"/> <b>No</b> <input type="checkbox"/> |
| <b>Urine samples</b>             |                                                                        |
| <b><i>C. trachomatis</i> PCR</b> | <b>Yes</b> <input type="checkbox"/> <b>No</b> <input type="checkbox"/> |
| <b><i>N. gonorrhoeae</i> PCR</b> | <b>Yes</b> <input type="checkbox"/> <b>No</b> <input type="checkbox"/> |
| <b><i>T. vaginalis</i> PCR</b>   | <b>Yes</b> <input type="checkbox"/> <b>No</b> <input type="checkbox"/> |
| <b><i>M. genitalium</i> PCR</b>  | <b>Yes</b> <input type="checkbox"/> <b>No</b> <input type="checkbox"/> |
| <b>Genital samples</b>           |                                                                        |
| <b>HPV genital swab</b>          | <b>Yes</b> <input type="checkbox"/> <b>No</b> <input type="checkbox"/> |
| <b>HPV anal canal swab</b>       | <b>Yes</b> <input type="checkbox"/> <b>No</b> <input type="checkbox"/> |
| <b>Anal cytology swab</b>        | <b>Yes</b> <input type="checkbox"/> <b>No</b> <input type="checkbox"/> |
| <b>Oral samples</b>              |                                                                        |
| <b>oral rinse sample</b>         | <b>Yes</b> <input type="checkbox"/> <b>No</b> <input type="checkbox"/> |
| <b>oral HPV swab</b>             | <b>Yes</b> <input type="checkbox"/> <b>No</b> <input type="checkbox"/> |

**Go to 8 Diagnosis and treatment**

## 8. DIAGNOSIS AND TREATMENT

*IF REQUIRED, please provide participant with **script for treatment** to be collected at the pharmacy and **partner notification slips**.*

8.1 Was the participant treated presumptively for any of the following at this visit?

**Yes**

**No**

Urethritis syndrome

☐☐

Genital ulcer syndrome

☐☐

Scrotal swelling

☐☐

Balanitis / Balanoposthitis

☐☐

Bubo

☐☐

Molluscum contagiosum

☐☐

Genital Warts

☐☐

Pubic lice

☐☐

**If Yes to any  
complete the  
concomitant Log**

8.2.a Did the participant require treatment for ANY

OTHER CONDITION?

Yes ☐

No ☐

**If yes to any  
complete the  
concomitant Log**

→8.2.b IF **YES**, provide details
