# Supplementary material
Source: publisher figshare collection journal article supplement (https://plos.figshare.com/articles/dataset/_/11324555)
Supplement: Supplementary file 1 [file 1 › pone.0225571.s006.pdf]

strate, per(100)

```
failure _d: hpvan_anyinc == 1
analysis time _t: (v3date-origin)/365.25
origin: time vdateic
enter on or after: time vdateic
id: ptid
```

Estimated rates (per 100) and lower/upper bounds of 95% confidence intervals  
(180 records included in the analysis)

```
+-----+
| D   Y   Rate  Lower  Upper |
|-----|
| 2  2.5364  0.78853  0.19721  3.15288 |
+-----+
```
